# Supplementary material for: Ammonia oxidation at pH 2.5 by a new gammaproteobacterial ammonia-oxidizing bacterium
Source: PubMed Central journal article supplement (PMC8115276; doi:10.1038/s41396-020-00840-7), 2020-12-10
Supplement: 41396_2020_840_MOESM1_ESM.pdf [file 41396_2020_840_MOESM1_ESM.pdf]

## Supplementary Information

### Ammonia oxidation at pH 2.5 by a new gammaproteobacterial ammonia-oxidizing bacterium

Nunzia Picone<sup>1</sup>, Arjan Pol<sup>1</sup>, Rob Mesman<sup>1</sup>, Maartje A.H.J. van Kessel<sup>1</sup>, Geert Cremers<sup>1</sup>, Antonie H. van Gelder<sup>2</sup>, Theo van Alen<sup>1</sup>, Mike S.M. Jetten<sup>1</sup>, Sebastian Lücker<sup>1</sup> and Huub J.M. Op den Camp<sup>1\*</sup>

<sup>1</sup>Department of Microbiology, IWWR, Radboud University, Heyendaalseweg 135, NL-6525 AJ, Nijmegen, The Netherlands

<sup>2</sup>Department of Agrotechnology and Food Sciences, Wageningen University, Stippeneng 4, NL-6708 WE, Wageningen, The Netherlands

\*Correspondent author

Huub J.M. Op den Camp

[h.opdencamp@science.ru.nl](mailto:h.opdencamp@science.ru.nl)

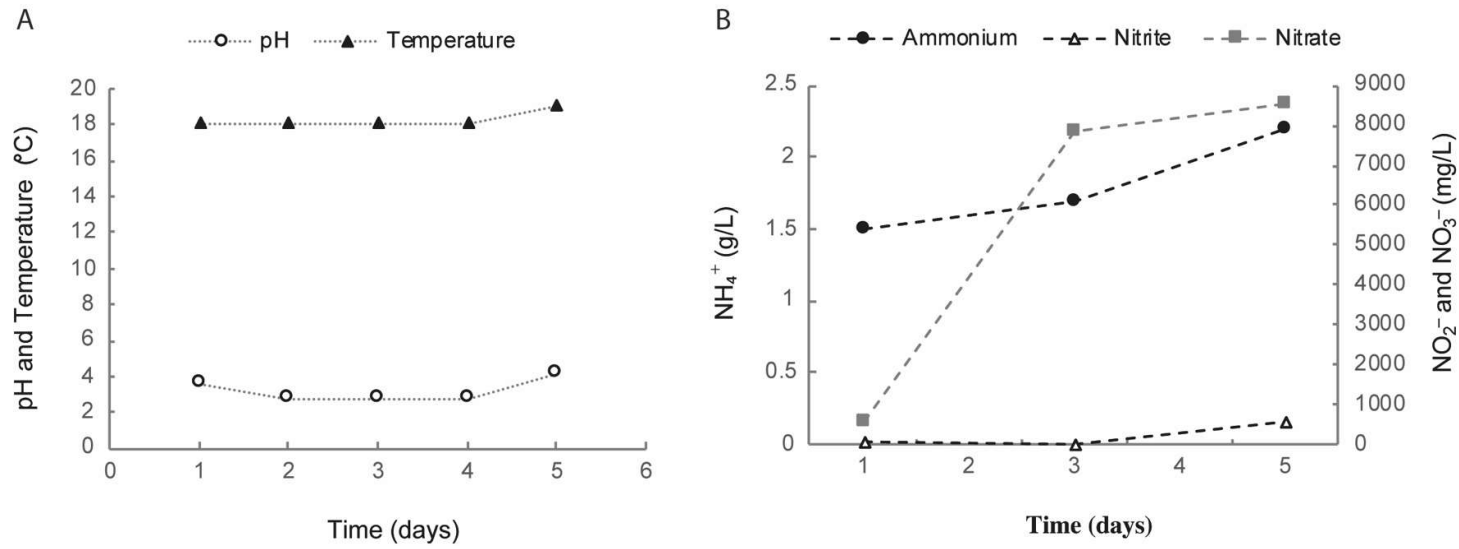

**Figure S1.** Characteristics of the acidic air scrubber. A) pH and Temperature registered in the air scrubber. B) Concentrations of  $\text{NH}_4^+$ ,  $\text{NO}_2^-$  and  $\text{NO}_3^-$  in the washing water.

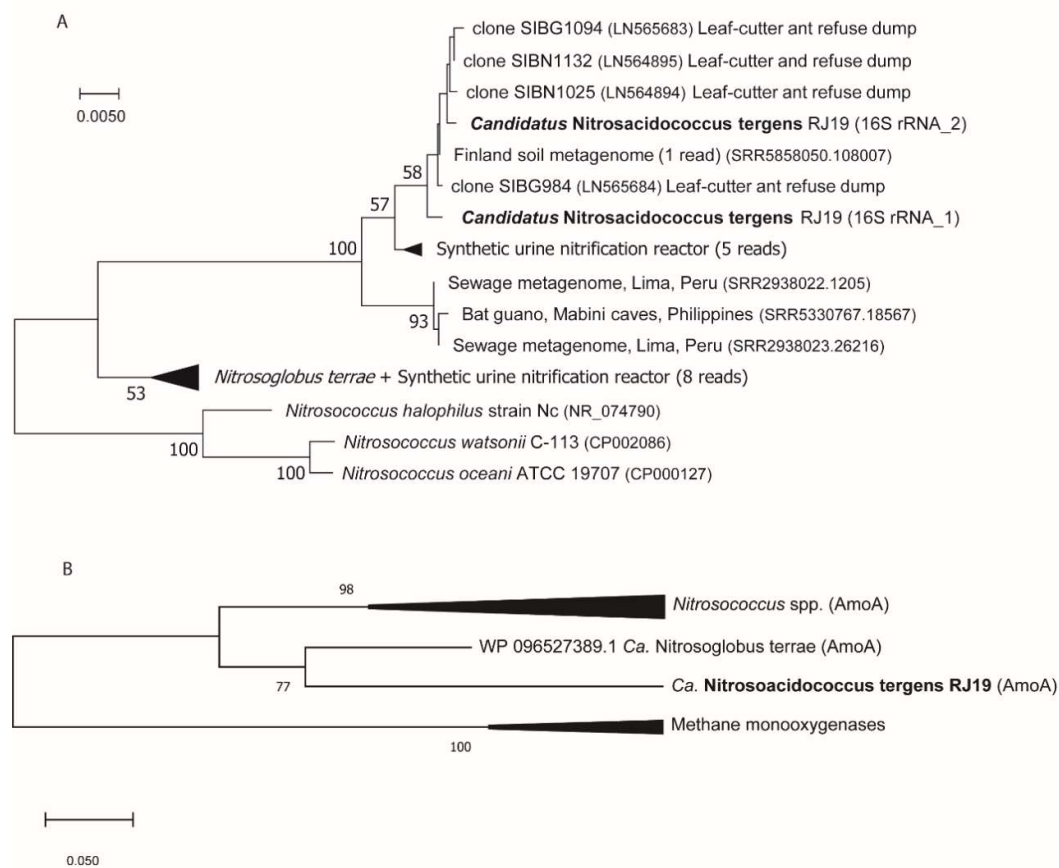

**Figure S2. (A)** 16S rRNA gene-based phylogenetic tree of “*Ca. Nitrosoacidococcus tergens*” RJ19, other nitrifiers and environmental sequences. The evolutionary history was inferred using the Neighbor-Joining method. The optimal tree with the sum of branch length = 0.22931256 is shown. The percentage of replicate trees in which the associated taxa clustered together in the bootstrap test (500 replicates) are shown next to the branches if >50. The tree is drawn to scale, with branch lengths in the same units as those of the evolutionary distances used to infer the phylogenetic tree. The evolutionary distances were computed using the Jukes-Cantor method and are in the units of the number of base substitutions per site. The analysis involved 29 nucleotide sequences. All ambiguous positions were removed for each sequence pair. There were a total of 1541 positions in the final dataset. **(B)** AmoA phylogenetic tree. The evolutionary history was inferred by using the Maximum Likelihood method and JTT matrix-based model. The tree with the highest log likelihood (-2179.61) is shown. The percentage of trees in which the associated taxa clustered together is shown next to the branches. Initial tree(s) for the heuristic search were obtained automatically by applying Neighbor-Join and BioNJ algorithms to a matrix of pairwise distances estimated using a JTT model, and then selecting the topology with superior log likelihood value. The tree is drawn to scale, with branch lengths measured in the number of substitutions per site. This analysis involved 13 amino acid sequences. There were a total of 255 positions in the final dataset. Evolutionary analyses were conducted in MEGA X. The group “*Nitrosococcus* spp.” contains 7 AmoA sequences of different members of the *Nitrosococcus* genus. The group “Methane monoxygenases” includes 4 methane/ammonia monoxygenases subunit A sequences from *Methylosarcina lacus* (WP02298805.1), an uncultured bacterium from Pavin lake (ARX77274.1), *Methylomonas* sp. (PPD34918.1), *Methylobacter* sp. (PPC90499.1).

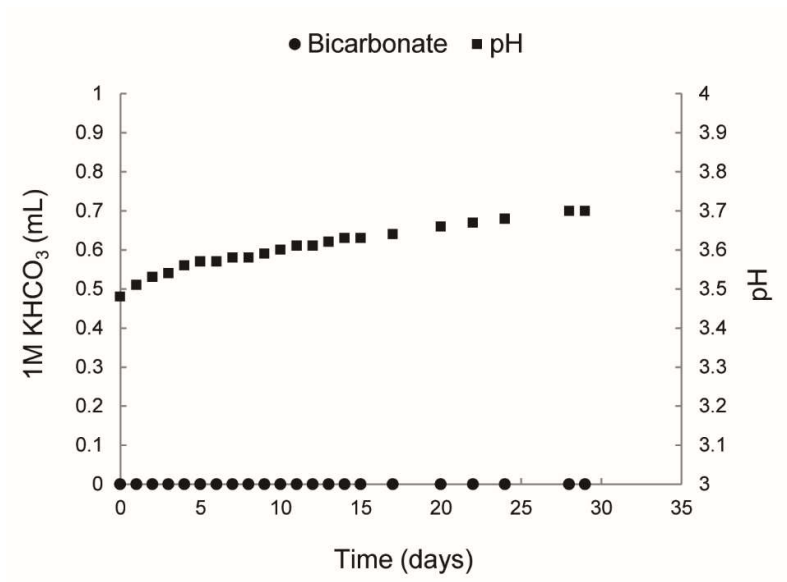

**Figure S3.** KHCO<sub>3</sub> consumption and pH trend in a bioreactor inoculated with inactive “*Ca. N. tergens* RJ19” biomass. KHCO<sub>3</sub> was not consumed and pH slightly increased.

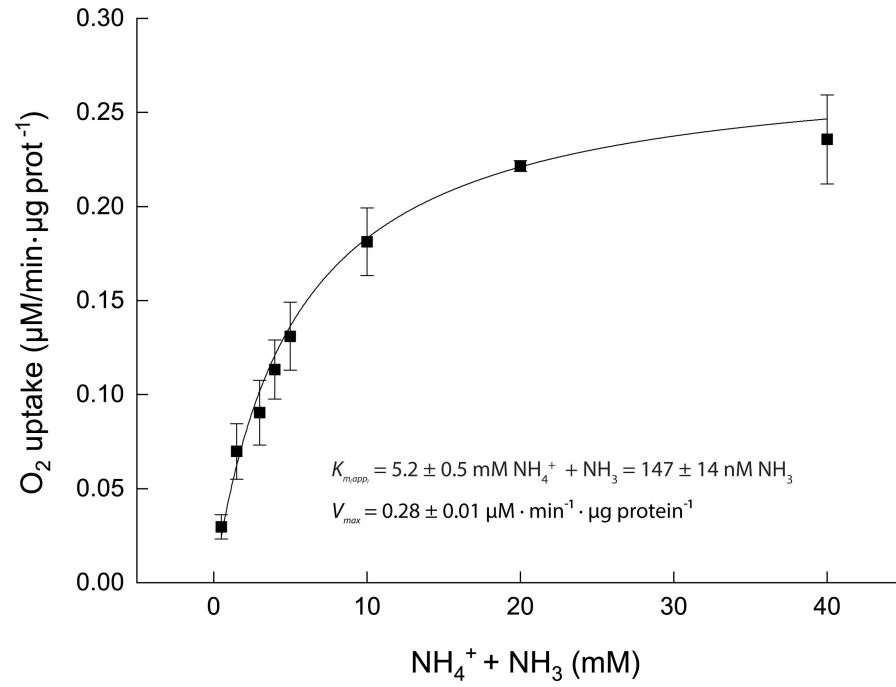

**Figure S4.** Ammonia oxidation kinetics of the “*Ca. Na. tergens*” sp. RJ19 enrichment culture. Black squares represent the average of three biological replicates. Bars indicate the standard deviation over the three measurements. The black curve represents the best nonlinear least-squares fit using Michaelis-Menten-type kinetics ( $R^2 = 0.998$ ).

**Table S1.** PCR primers used in this study.

| Target                          | Primer name    | Sequence                              | T <sub>m</sub> (°C) | Product size (bp) | Reference      |
|---------------------------------|----------------|---------------------------------------|---------------------|-------------------|----------------|
| Genome gap #1                   | 1_Nac_370455f  | 5'- GAC GCT TAC CAT AGC GCT CA -3'    | 58.5                | 645               | This work      |
| Genome gap #1                   | 1_Nac_371080r  | 5'- CAG TGG TAG TGC TAG AGC AG -3'    | 56.4                |                   | This work      |
| Genome gap #2                   | 2_Nac_1370669f | 5'- TGC TGT CGT CCA TAC ATG GC -3'    | 56.6                | 619               | This work      |
| Genome gap #2                   | 2_Nac_1371268r | 5'- GCA TTA CAA GAG CAG AAG TGC -3'   | 55.9                |                   | This work      |
| Genome gap #3                   | 3_Nac_1402503f | 5'- GAG CTA GCG TAA TAG TGA GTG -3'   | 55.2                | 697               | This work      |
| Genome gap #3                   | 3_Nac_1403179r | 5'- CTG TCC AAG TAC TGG TAG CTG A -3' | 56.8                |                   | This work      |
| pGEM-T Easy plasmid             | M13F           | 5'-GGT TTT CCC AGT CAC GAC-3'         | 56                  |                   | BaseClear B.V. |
| pGEM-T Easy plasmid             | M13R           | 5'-AGC GGA TAA CAA TTT CAC AC-3'      | 52                  |                   | BaseClear B.V. |
| 16S rRNA                        | 16Snitro2F     | 5'-GGA ATT ACT GGG CGT AAA GG-3'      | 53                  | ~630              | This work      |
| 16S rRNA                        | 16Snitro2R     | 5'-CCT TCC TCC GTT TTG TCA A-3'       | 51.8                |                   | This work      |
| Ammonia monooxygenase subunit A | amoAnitro1F    | 5'-TKG AYT GGA AAG ATC GCC G-3'       | 55                  | 421               | This work      |
| Ammonia monooxygenase subunit A | amoAnitro1R    | 5'-CCA GTR CGM ACA TAM TG-3'          | 48                  |                   | This work      |

**Table S2.** Efficiency measurements of NH<sub>3</sub> and odour removal in the acidic air scrubber.

| Component       | Location            | Unit                            | Value |
|-----------------|---------------------|---------------------------------|-------|
| NH <sub>3</sub> | Before air scrubber | mg/m <sup>3</sup> <sub>0</sub>  | 16    |
|                 | After air scrubber  | mg/m <sup>3</sup> <sub>0</sub>  | 0.13  |
|                 | Performance         | %                               | 99    |
|                 | Air                 | mg/m <sup>3</sup> <sub>0</sub>  | 0.039 |
| Odour           | Before air scrubber | OU <sub>E</sub> /m <sup>3</sup> | 5500  |
|                 | After air scrubber  | OU <sub>E</sub> /m <sup>3</sup> | 1160  |
|                 | Performance         | %                               | 79    |
|                 | Air                 | OU <sub>E</sub> /m <sup>3</sup> | 78    |

**Table S3.** Composition of the bacterial community in the acidic air scrubber. The metagenome reads were mapped against the Silva database for 16S rRNA analysis. Values are expressed as % of the total read count and reported on Genus level. The group “others” contains genera with total read count  $\leq 2\%$ .

| Genus                      | Abundance (%) |
|----------------------------|---------------|
| uncultured                 | 20.8          |
| <i>Castellaniella</i>      | 8.9           |
| <i>Nitrosococcus</i> -like | 6.4           |
| <i>Moheibacter</i>         | 3.6           |
| <i>Comamonas</i>           | 2.9           |
| <i>Salmonella</i>          | 2.9           |
| <i>Pseudomonas</i>         | 2.7           |
| <i>Vibrio</i>              | 2.6           |
| <i>Pseudoxanthomonas</i>   | 2.3           |
| <i>Ottowia</i>             | 2.2           |
| <i>Rhodanobacter</i>       | 2.0           |
| others*                    | 42.6          |

**Table S4.** 16S rRNA sequence identity between “*Ca. N. tergens* RJ19”, *Nitrosococcus oceani* ATCC 19707, *Nitrosococcus halophilus* Nc4, *Nitrosococcus watsonii* C-113 and “*Ca. Nitrosoglobus terrae* TAO100”.

|                                | “ <i>Ca. N. tergens</i> RJ19” | <i>N. oceani</i> ATCC 19707 | <i>N. halophilus</i> Nc4 | <i>N. watsonii</i> C-113 |
|--------------------------------|-------------------------------|-----------------------------|--------------------------|--------------------------|
| <i>N. oceani</i> ATCC 19707    | 91%                           |                             |                          |                          |
| <i>N. halophilus</i> Nc4       | 91%                           | 96%                         |                          |                          |
| <i>N. watsonii</i> C-113       | 91%                           | 99%                         | 96%                      |                          |
| “ <i>Ca. N. terrae</i> TAO100” | 92%                           | 95%                         | 95%                      | 95%                      |

**Table S5.** Average Nucleotide Identity (ANI) of “*Ca. N. tergens* RJ19” and *Nitrosococcus oceani* ATCC 19707, *Nitrosococcus halophilus* Nc4, *Nitrosococcus watsonii* C-113 and “*Ca. Nitrosoglobus terrae* TAO100”.

|                                      | <b>“<i>Ca. N. tergens</i> RJ19”</b> | <b><i>N. oceani</i> ATCC 19707</b> | <b><i>N. halophilus</i> Nc4</b> | <b><i>N. watsonii</i> C-113</b> |
|--------------------------------------|-------------------------------------|------------------------------------|---------------------------------|---------------------------------|
| <b><i>N. oceani</i> ATCC 19707</b>   | 81%                                 |                                    |                                 |                                 |
| <b><i>N. halophilus</i> Nc4</b>      | 78.5%                               | 78.6%                              |                                 |                                 |
| <b><i>N. watsonii</i> C-113</b>      | 78.6%                               | 88.8%                              | 74.5%                           |                                 |
| <b>“<i>Ca. N. terrae</i>” TAO100</b> | 76.2%                               | 74.8%                              | 74.5%                           | 74.8%                           |

**Table S6.** Ammonia monooxygenase (AmoA) amino acid sequence identity between” *Ca. N. tergens* RJ19” and *Nitrosococcus oceani* ATCC 19707, *Nitrosococcus halophilus* Nc4, *Nitrosococcus watsonii* C-113 and “*Ca. Nitrosoglobus terrae* TAO100”.

|                                      | <b>“<i>Ca. N. tergens</i> RJ19”</b> | <b><i>N. oceani</i> ATCC 19707</b> | <b><i>N. halophilus</i> Nc4</b> | <b><i>N. watsonii</i> C-113</b> |
|--------------------------------------|-------------------------------------|------------------------------------|---------------------------------|---------------------------------|
| <b><i>N. oceani</i> ATCC 19707</b>   | 71%                                 |                                    |                                 |                                 |
| <b><i>N. halophilus</i> Nc4</b>      | 72%                                 | 85%                                |                                 |                                 |
| <b><i>N. watsonii</i> C-113</b>      | 72%                                 | 97%                                | 84%                             |                                 |
| <b>“<i>Ca. N. terrae</i>” TAO100</b> | 78%                                 | 74%                                | 79%                             | 75%                             |



**Table S7.** “*Ca. Nitrosacidococcus tergens* RJ19” proteins with predicted functions.<sup>a</sup> “*Ca. N. tergens*” protein identifier; <sup>b</sup> Organism with highest scoring BLAST hit to “*Ca. N. tergens* RJ19” protein in SwissProt database. In parentheses: SwissProt accession number of best hit, amino acid identity. <sup>c</sup> Organism with highest scoring BLAST hit to “*Ca. N. tergens* RJ19” protein in TrEMBL database. In parentheses: TrEMBL accession number of best hit, amino acid identity.

| Energy metabolism |                                                      |          |                  |                                                                                       |                                                                       |
|-------------------|------------------------------------------------------|----------|------------------|---------------------------------------------------------------------------------------|-----------------------------------------------------------------------|
| COMPLEX I         |                                                      |          |                  |                                                                                       |                                                                       |
| Gene              | Product                                              | EC no.   | CDS <sup>a</sup> | Best BLAST hit in SwissProt <sup>b</sup>                                              | Best BLAST hit in TrEMBL <sup>c</sup>                                 |
| <i>nuoA</i>       | NADH ubiquinone oxidoreductase subunit A             | 1.6.99.5 | NSCAC_0235       | <i>Acidithiobacillus ferrooxidans</i> ATCC 53993 (B5EN71, 73.73%)                     | <i>Nitrosococcus halophilus</i> Nc4 (D5C2P5, 83.9%)                   |
| <i>nuoB</i>       | NADH ubiquinone oxidoreductase subunit B             | 1.6.99.5 | NSCAC_0236       | <i>Nitrosococcus oceani</i> ATCC 19707 / NCIMB 11848 (Q3J829, 94.3%)                  | <i>Nitrosococcus oceani</i> AFC27 (B6C6D6, 94.3%)                     |
| <i>nuoC</i>       | NADH ubiquinone oxidoreductase subunit C             | 1.6.99.5 | NSCAC_0237       | <i>Nitrosococcus oceani</i> ATCC 19707 / NCIMB 11848 (Q3J830, 69.91%)                 | <i>Nitrosococcus oceani</i> AFC27 (B6C6D5, 69.91%)                    |
| <i>nuoD</i>       | NADH ubiquinone oxidoreductase subunit D             | 1.6.99.5 | NSCAC_0238       | <i>Nitrosococcus oceani</i> ATCC 19707 / NCIMB 11848 (Q3J831, 88.49%)                 | <i>Nitrosococcus halophilus</i> Nc4 (D5C2P2, 88.01%)                  |
| <i>nuoE</i>       | NADH ubiquinone oxidoreductase subunit E             | 1.6.99.5 | NSCAC_0239       | <i>Rickettsia bellii</i> RML369-C (Q1RJ1, 47.22%)                                     | <i>Nitrosococcus halophilus</i> Nc4 (D5C2P1, 77.64%)                  |
| <i>nuoF</i>       | NADH ubiquinone oxidoreductase subunit F             | 1.6.99.5 | NSCAC_0240       | <i>Rickettsia bellii</i> OSU 85-389 (A8GYE0, 54.79%)                                  | <i>Nitrosococcus halophilus</i> Nc4 (D5C2P0, 79.95%)                  |
| <i>nuoG</i>       | NADH ubiquinone oxidoreductase subunit G             | 1.6.99.5 | NSCAC_0241       | <i>Macaca fascicularis</i> (Q4R6K9, 37.17%)                                           | <i>Nitrosococcus halophilus</i> Nc4 (D5C2N9, 64.65%)                  |
| <i>nuoH</i>       | NADH ubiquinone oxidoreductase subunit H             | 1.6.99.5 | NSCAC_0242       | <i>Nitrosococcus oceani</i> ATCC 19707 / NCIMB 11848 (Q3J835, 82.23%)                 | <i>Nitrosococcus oceani</i> AFC27 (B6C6D0, 82.23%)                    |
| <i>nuoI</i>       | NADH ubiquinone oxidoreductase subunit I             | 1.6.99.5 | NSCAC_0243       | <i>Nitrosococcus oceani</i> ATCC 19707 / NCIMB 11848 (Q3J836, 88.89%)                 | <i>Nitrosococcus oceani</i> AFC27 (B6C6C9, 88.89%)                    |
| <i>nuoJ</i>       | NADH ubiquinone oxidoreductase subunit J             | 1.6.99.5 | NSCAC_0244       | <i>Cyanidium caldarium</i> (P48925, 42.27%)                                           | <i>Nitrosococcus halophilus</i> Nc4 (D5C2N6, 73.87%)                  |
| <i>nuoK</i>       | NADH ubiquinone oxidoreductase subunit K             | 1.6.99.5 | NSCAC_0245       | <i>Methylothermobacter mobilis</i> JLW8 / ATCC BAA-1282 / DSM 17540 (C6WX51, 75.25%)  | <i>Nitrosococcus halophilus</i> Nc4 (D5C2N5, 87.13%)                  |
| <i>nuoL</i>       | NADH ubiquinone oxidoreductase subunit L             | 1.6.99.5 | NSCAC_0246       | <i>Neisseria meningitidis</i> serogroup A / serotype 4A strain Z2491 (Q9JX92, 55.77%) | <i>Nitrosococcus oceani</i> ATCC 19707 / NCIMB 11848 (Q3J839, 77.73%) |
| <i>nuoM</i>       | NADH ubiquinone oxidoreductase subunit M             | 1.6.99.5 | NSCAC_0247       | <i>Rhodobacter capsulatus</i> (P50974, 45.96%)                                        | <i>Nitrosococcus halophilus</i> Nc4 (D5C2N3, 78.4%)                   |
| <i>nuoN</i>       | NADH ubiquinone oxidoreductase subunit N             | 1.6.99.5 | NSCAC_0248       | <i>Nitrosococcus oceani</i> ATCC 19707 / NCIMB 11848 (Q3J841, 73.64%)                 | <i>Nitrosococcus watsoni</i> C-113 (D8KAZ8, 74.27%)                   |
| COMPLEX III       |                                                      |          |                  |                                                                                       |                                                                       |
| <i>petC</i>       | Quinol-cytochrome c reductase, cytochrome c1 subunit | 1.10.2.2 | NSCAC_0089       | <i>Allochromatium vinosum</i> ATCC 17899 / DSM 180 / NBRC 103801 / D (O31216, 48.57%) | <i>Nitrosococcus halophilus</i> Nc4 (D5C3G7, 65%)                     |
| <i>petB</i>       | Quinol-cytochrome c reductase, cytochrome b subunit  | 1.10.2.2 | NSCAC_0090       | <i>Allochromatium vinosum</i> ATCC 17899 / DSM 180 / NBRC 103801 / D (O31215, 61.88%) | <i>Nitrosococcus watsoni</i> C-113 (D8K9S4, 70.56%)                   |

|             |                                                                               |          |            |                                                                                                     |                                                                       |
|-------------|-------------------------------------------------------------------------------|----------|------------|-----------------------------------------------------------------------------------------------------|-----------------------------------------------------------------------|
| <i>ptaA</i> | Quinol-cytochrome c reductase, iron-sulfur subunit                            | 1.10.2.2 | NSCAC 0091 | <i>Allochromatium vinosum</i> ATCC 17899 / DSM 180 / NBRC 103801 / D (O31214, 61.66%)               | <i>Nitrosococcus watsoni</i> C-113 (D8K9S3, 75.49%)                   |
|             | <b>COMPLEX IV</b>                                                             |          |            |                                                                                                     |                                                                       |
| <i>coxB</i> | Cytochrome c oxidase, subunit II                                              | 1.9.3.1  | NSCAC 0136 | <i>Thermus thermophilus</i> (P98052, 30.28%)                                                        | <i>Nitrosococcus oceani</i> ATCC 19707 / NCIMB 11848 (Q3J6Y3, 65.52%) |
| <i>coxA</i> | Cytochrome c oxidase, subunit I                                               | 1.9.3.1  | NSCAC 0137 | <i>Allomyces macrogynus</i> (P80440, 22.32%)                                                        | <i>Nitrosococcus oceani</i> ATCC 19707 / NCIMB 11848 (Q3J6Y4, 70.12%) |
|             | Cytochrome oxidase biogenesis protein SCO1/SenC                               |          | NSCAC 0138 | <i>Pseudomonas stutzeri</i> (P47206, 29.26%)                                                        | <i>Nitrosococcus oceani</i> ATCC 19707 / NCIMB 11848 (Q3J6Y5, 58.38%) |
|             | conserved membrane protein of unknown function, cytochrome oxidase associated |          | NSCAC 0139 |                                                                                                     | <i>Nitrosococcus halophilus</i> Nc4 (D5BVI2, 67.96%)                  |
| <i>ctaB</i> | Protoheme IX farnesyltransferase                                              | 2.5.1.-  | NSCAC 1713 | <i>Nitrosococcus oceani</i> ATCC 19707 / NCIMB 11848 (Q3J6R6, 80.74%)                               | <i>Nitrosococcus halophilus</i> Nc4 (D5C4A2, 81.42%)                  |
| <i>ctaA</i> | Heme A synthase                                                               | 1.3.-.-  | NSCAC 1714 | <i>Sphingomonas wittichii</i> RW1 / DSM 6014 / JCM 10273 (A5VF68, 24.93%)                           | <i>Nitrosococcus watsoni</i> C-113 (D8K4K7, 66.18%)                   |
|             | putative Cytochrome oxidase biogenesis protein SurfI                          |          | NSCAC 1716 | <i>Schizosaccharomyces pombe</i> 972 / ATCC 24843 (Q9Y810, 26.91%)                                  | <i>Nitrosococcus watsoni</i> C-113 (D8K4K9, 46.53%)                   |
| <i>ctaE</i> | Cytochrome c oxidase, subunit III                                             | 1.9.3.1  | NSCAC 1718 | <i>Latimeria chalumnae</i> (O03170, 40.56%)                                                         | <i>Nitrosococcus halophilus</i> Nc4 (D5C497, 70.14%)                  |
| <i>ctaG</i> | Cytochrome c oxidase assembly protein CtaG                                    |          | NSCAC 1719 | <i>Arabidopsis thaliana</i> (Q8GWR0, 35.45%)                                                        | <i>Nitrosococcus oceani</i> ATCC 19707 / NCIMB 11848 (Q3J6R0, 60.22%) |
| <i>ctaD</i> | Cytochrome c oxidase, subunit I                                               | 1.9.3.1  | NSCAC 1721 | <i>Bradyrhizobium diazoefficiens</i> JCM 10833 / IAM 13628 / NBRC 14792 / USDA 110 (P31833, 53.32%) | <i>Nitrosococcus halophilus</i> Nc4 (D5C495, 78.05%)                  |
| <i>ctaC</i> | Cytochrome c oxidase subunit II                                               | 1.9.3.1  | NSCAC 1722 | <i>Rickettsia bellii</i> RML369-C (Q1RI44, 38.98%)                                                  | <i>Nitrosococcus halophilus</i> Nc4 (D5C494, 74.9%)                   |
|             | <b>COMPLEX V</b>                                                              |          |            |                                                                                                     |                                                                       |
| <i>atpC</i> | F1 sector of membrane-bound ATP synthase, epsilon subunit                     | 3.6.3.14 | NSCAC 1767 | <i>Nitrosococcus oceani</i> ATCC 19707 / NCIMB 11848 (Q3J6N2, 72.46%)                               | <i>Nitrosococcus halophilus</i> Nc4 (D5C418, 75%)                     |
| <i>atpD</i> | F1 sector of membrane-bound ATP synthase, beta subunit                        | 3.6.3.14 | NSCAC 1768 | <i>Nitrosococcus oceani</i> ATCC 19707 / NCIMB 11848 (Q3J6N1, 94.76%)                               | <i>Nitrosococcus watsoni</i> C-113 (D8K4P4, 95.2%)                    |
| <i>atpG</i> | F1 sector of membrane-bound ATP synthase, gamma subunit                       | 3.6.3.14 | NSCAC 1769 | <i>Nitrosococcus oceani</i> ATCC 19707 / NCIMB 11848 (Q3J6N0, 78.28%)                               | <i>Nitrosococcus halophilus</i> Nc4 (D5C420, 82.29%)                  |
| <i>atpA</i> | F1 sector of membrane-bound ATP synthase, alpha subunit                       | 3.6.3.14 | NSCAC 1770 | <i>Nitrosococcus oceani</i> ATCC 19707 / NCIMB 11848 (Q3J6M9, 87.77%)                               | <i>Nitrosococcus watsoni</i> C-113 (D8K4P6, 88.16%)                   |
| <i>atpH</i> | F1 sector of membrane-bound ATP synthase, delta subunit                       | 3.6.3.14 | NSCAC 1771 | <i>Nitrosococcus oceani</i> ATCC 19707 / NCIMB 11848 (Q3J6M8, 60.22%)                               | <i>Nitrosococcus watsoni</i> C-113 (D8K4P7, 59.12%)                   |
| <i>atpF</i> | F0 sector of membrane-bound ATP synthase, subunit b                           | 3.6.3.14 | NSCAC 1772 | <i>Nitrosococcus oceani</i> ATCC 19707 / NCIMB 11848 (Q3J6M7, 74.36%)                               | <i>Nitrosococcus watsoni</i> C-113 (D8K4P8, 74.36%)                   |
| <i>atpE</i> | F0 sector of membrane-bound ATP synthase, subunit c                           | 3.6.3.14 | NSCAC 1773 | <i>Nitrosococcus oceani</i> ATCC 19707 / NCIMB 11848 (Q3J6M6, 86.02%)                               | <i>Nitrosococcus halophilus</i> Nc4 (D5C424, 89.36%)                  |
| <i>atpB</i> | F0 sector of membrane-bound ATP synthase, subunit a                           | 3.6.3.14 | NSCAC 1774 | <i>Methylococcus capsulatus</i> ATCC 33009 / NCIMB 11132 / Bath (Q60CS0, 52.78%)                    | <i>Nitrosococcus halophilus</i> Nc4 (D5C425, 76.78%)                  |

| Cytochromes c           |                                                                           |           |                  |                                                                                             |                                                                       |
|-------------------------|---------------------------------------------------------------------------|-----------|------------------|---------------------------------------------------------------------------------------------|-----------------------------------------------------------------------|
|                         | Cytochrome c class I                                                      |           | NSCAC 0107       | <i>Halomonas halodenitrificans</i> ATCC 12084 / NCIMB 8669 (P00105, 39.02 %)                | <i>Nitrosococcus halophilus</i> Nc4 (D5C293, 55.66%)                  |
|                         | Putative di-heme cytochrome c                                             |           | NSCAC 0988       | <i>Rhizobium</i> sp. NGR234 (P55493, 28.08%)                                                | <i>Nitrosococcus oceani</i> ATCC 19707 / NCIMB 11848 (Q3JAR1, 63.5%)  |
|                         | Cytochrome c class I (fragment)                                           |           | NSCAC 1084       | <i>Chlorobaculum thiosulfatiphilum</i> (Q8RLX0, 29.2%)                                      | <i>Nitrosococcus watsoni</i> C-113 (D8KBT1, 65.35%)                   |
| <i>cycA</i>             | Cytochrome c class I                                                      |           | NSCAC 1390       | <i>Azotobacter vinelandii</i> (P43302, 40.91%)                                              | <i>Nitrosococcus halophilus</i> Nc4 (D5C0V9, 56.93%)                  |
|                         | Cytochrome c, class I                                                     |           | NSCAC 1724       | <i>Pseudomonas aeruginosa</i> ATCC 15692 / PAO1 / 1C / PRS 101 / LMG 12228 (P00106, 49.47%) | <i>Nitrosococcus watsoni</i> C-113 (D8K4L7, 66.96%)                   |
|                         | Cytochrome c, class I                                                     |           | NSCAC 1725       | <i>Marinobacter hydrocarbonoclasticus</i> (P82903, 41.67%)                                  | <i>Nitrosococcus halophilus</i> Nc4 (D5C491, 69.72%)                  |
|                         | Putative cytochrome c, class I                                            |           | NSCAC 0748       | <i>Anopheles gambiae</i> (Q5TWR9, 45.71%)                                                   | <i>Rhodospirillum photometricum</i> DSM 122 (H6SIA7, 84.62%)          |
| Nitrogen metabolism     |                                                                           |           |                  |                                                                                             |                                                                       |
| Ammonia oxidation       |                                                                           |           |                  |                                                                                             |                                                                       |
| Gene                    | Product                                                                   | EC no.    | CDS <sup>a</sup> | Best BLAST hit in SwissProt <sup>b</sup>                                                    | Best BLAST hit in TrEMBL <sup>c</sup>                                 |
| <i>amoB</i>             | Ammonia monooxygenase subunit B                                           | 1.13.12.- | NSCAC 1277       | <i>Methylococcus capsulatus</i> ATCC 33009 / NCIMB 11132 / Bath (G1UBD1, 53.56%)            | <i>Nitrosococcus halophilus</i> Nc4 (D5BWX6, 64.99%)                  |
| <i>amoA</i>             | Ammonia monooxygenase subunit A                                           | 1.13.12.- | NSCAC 1278       | <i>Methylococcus capsulatus</i> ATCC 33009 / NCIMB 11132 / Bath (Q607G3, 58.92%)            | <i>Nitrosococcus halophilus</i> Nc4 (D5BWX5, 71.95%)                  |
| <i>amoC</i>             | Ammonia monooxygenase subunit C                                           | 1.13.12.- | NSCAC 1280       |                                                                                             | <i>Nitrosococcus oceani</i> ATCC 19707 / NCIMB 11848 (Q3J890, 74.81%) |
| <i>amoD</i>             | Putative ammonia monooxygenase subunit D                                  |           | NSCAC 1276       |                                                                                             | <i>Nitrosococcus halophilus</i> strain Nc4 (D5BWX7, 37.7%)            |
| <i>cycX</i>             | putative tetraheme cytochrome c                                           |           | NSCAC 1125       | <i>Nitrosomonas europaea</i> ATCC 19718 / NBRC 14298 (Q50926, 61.68%)                       | <i>Nitrosococcus oceani</i> AFC27 (B6BZS6, 73.21%)                    |
|                         | conserved protein of unknown function, putative HaoB                      |           | NSCAC 1126       |                                                                                             | <i>Nitrosococcus halophilus</i> Nc4 (D5BZ45, 56.61%)                  |
| <i>hao</i>              | Hydroxylamine dehydrogenase                                               | 1.7.2.6   | NSCAC 1127       | <i>Nitrosomonas europaea</i> ATCC 19718 / NBRC 14298 (Q50925, 51.06%)                       | <i>Nitrosococcus halophilus</i> Nc4 (D5BZ44, 73.76%)                  |
|                         | conserved protein of unknown function, putative ammonia/ammonium permease |           | NSCAC 1037       | <i>Escherichia coli</i> K12 (P0AA93, 29.49%)                                                | <i>Nitrosococcus halophilus</i> Nc4 (D5C4N1, 53.85%)                  |
|                         | Formate/nitrite transporter                                               |           | NSCAC 1564       | <i>Methanothermobacter thermautotrophicus</i> (Q50568, 33.46%)                              | <i>Nitrosococcus watsoni</i> C-113 (D8K879, 66.28%)                   |
| <i>cyp</i>              | Putative Cytochrome P460                                                  |           | NSCAC 1129       |                                                                                             | <i>Nitrosococcus halophilus</i> Nc4 (D5BZ42, 67.78%)                  |
| Nitric oxide metabolism |                                                                           |           |                  |                                                                                             |                                                                       |

|                         |                                              |               |                        |                                                                                             |                                                         |
|-------------------------|----------------------------------------------|---------------|------------------------|---------------------------------------------------------------------------------------------|---------------------------------------------------------|
| <i>norB</i>             | Nitric oxide reductase                       | 1.7.2.5       | NSCAC<br>1563          | <i>Pseudomonas aeruginosa</i> ATCC 15692 / PAO1 / 1C / PRS 101 / LMG 12228 (Q59647, 23.77%) | <i>Rhodanobacter denitrificans</i> (I4WS67, 65.38%)     |
|                         | <b>Urea metabolism</b>                       |               |                        |                                                                                             |                                                         |
|                         | Urea transporter                             |               | NSCAC<br>0475          | <i>Homo sapiens</i> (Q13336, 30.98%)                                                        | <i>Nitrosococcus oceani</i> AFC27 (B6C5D8, 58.63%)      |
| <i>ureD</i>             | Urease accessory protein UreD                |               | NSCAC<br>0476          | <i>Nitrosococcus oceani</i> ATCC 19707 / NCIMB 11848 (Q3J767, 62.77%)                       | <i>Nitrosococcus oceani</i> AFC27 (B6C5D7, 62.77%)      |
| <i>ureA</i>             | Urease gamma subunit                         | 3.5.1.5       | NSCAC<br>0477          | <i>Nitrosococcus oceani</i> ATCC 19707 / NCIMB 11848 (Q3J768, 85.86%)                       | <i>Nitrosococcus watsoni</i> C-113 (D8K8W9, 87.88%)     |
| <i>ureB</i>             | Urease beta subunit                          | 3.5.1.5       | NSCAC<br>0478          | <i>Nitrosococcus oceani</i> ATCC 19707 / NCIMB 11848 (Q3J769, 75.25%)                       | <i>Nitrosococcus oceani</i> AFC27 (B6C5D5, 75.25%)      |
| <i>ureC</i>             | Urease alpha subunit                         | 3.5.1.5       | NSCAC<br>0479          | <i>Nitrosococcus oceani</i> ATCC 19707 / NCIMB 11848 (Q3J770, 77.92%)                       | <i>Nitrosococcus watsoni</i> C-113 (D8K8X1, 77.39%)     |
| <i>ureE</i>             | Urease accessory protein UreE                |               | NSCAC<br>0480          | <i>Nitrosococcus oceani</i> ATCC 19707 / NCIMB 11848 (Q3J771, 68.71%)                       | <i>Nitrosococcus oceani</i> AFC27 (B6C5D3, 68.71%)      |
| <i>ureF</i>             | Urease accessory protein UreF                |               | NSCAC<br>0481          | <i>Nitrosococcus oceani</i> ATCC 19707 / NCIMB 11848 (Q3J772, 60.71%)                       | <i>Nitrosococcus watsoni</i> C-113 (D8K8X3, 61.61%)     |
| <i>ureG</i>             | Urease accessory protein UreG                |               | NSCAC<br>0482          | <i>Nitrosococcus oceani</i> ATCC 19707 / NCIMB 11848 (Q3J773, 84.16%)                       | <i>Nitrosococcus watsoni</i> C-113 (D8K8X4, 84.65%)     |
|                         | <b>Carbon metabolism</b>                     |               |                        |                                                                                             |                                                         |
|                         | <b>Carbonate uptake</b>                      |               |                        |                                                                                             |                                                         |
| <b>Gene</b>             | <b>Product</b>                               | <b>EC no.</b> | <b>CDS<sup>a</sup></b> | <b>Best BLAST hit in SwissProt<sup>b</sup></b>                                              | <b>Best BLAST hit in TrEMBL<sup>c</sup></b>             |
| <i>can1</i>             | Carbonic anhydrase 1                         | 4.2.1.1       | NSCAC<br>0743          | <i>Shigella flexneri</i> (P61518, 54.37%)                                                   | <i>Pseudoxanthomonas spadix</i> BD-a59 (G7UV66, 63.11%) |
| <i>can2</i>             | Carbonic anhydrase 2                         | 4.2.1.1       | NSCAC<br>0938          | <i>Mycobacterium tuberculosis</i> (P64797, 42.31%)                                          | <i>Nitrosococcus halophilus</i> Nc4 (D5BZ98, 79.69%)    |
|                         | <b>Calvin cycle</b>                          |               |                        |                                                                                             |                                                         |
| <i>cbbL</i>             | Ribulose biphosphate carboxylase large chain | 4.1.1.39      | NSCAC<br>0587          | <i>Nitrosococcus oceani</i> ATCC 19707 / NCIMB 11848 (Q3JE87, 92.4%)                        | <i>Nitrosococcus watsoni</i> C-113 (D8KAW1, 93.02%)     |
| <i>cbbS</i>             | Ribulose biphosphate carboxylase small chain | 4.1.1.39      | NSCAC<br>0588          | <i>Cupriavidus necator</i> ATCC 17699 / H16 / DSM 428 / Stanier 337 (Q59102, 70.29%)        | <i>Nitrosococcus halophilus</i> Nc4 (D5C1B8, 85.42%)    |
| <i>pgk</i>              | Phosphoglycerate kinase                      | 2.7.2.3       | NSCAC<br>0211          | <i>Nitrosococcus oceani</i> ATCC 19707 / NCIMB 11848 (Q3J7E3, 77.44%)                       | <i>Nitrosococcus halophilus</i> Nc4 (D5C1C3, 80.41%)    |
| <i>cbbG</i><br><i>P</i> | Glyceraldehyde-3-phosphate dehydrogenase     | 1.2.1.12      | NSCAC<br>0210          | <i>Cupriavidus necator</i> ATCC 17699 / H16 / DSM 428 / Stanier 337 (P50322, 74.48%)        | <i>Nitrosococcus halophilus</i> Nc4 (D5C1C4, 83.68%)    |
| <i>fbA</i>              | Fructose-biphosphate aldolase                | 4.1.2.13      | NSCAC<br>0213          | <i>Pseudomonas stutzeri</i> (O87796, 76.27%)                                                | <i>Nitrosococcus halophilus</i> Nc4 (D5C1C1, 88.7%)     |
| <i>fbp</i>              | Fructose-1,6-biphosphatase I                 | 3.1.3.11      | NSCAC<br>0004          | <i>Nitrosococcus oceani</i> ATCC 19707 / NCIMB 11848 (Q3JF33, 74.77%)                       | <i>Nitrosococcus halophilus</i> Nc4 (D5C445, 76.28%)    |

|             |                                     |          |               |                                                                                   |                                                                       |
|-------------|-------------------------------------|----------|---------------|-----------------------------------------------------------------------------------|-----------------------------------------------------------------------|
| <i>tktA</i> | Transketolase                       | 2.2.1.1  | NSCAC<br>0209 | <i>Escherichia coli</i> K12 (P27302, 70.48%)                                      | <i>Nitrosococcus halophilus</i> Nc4 (D5C1C5, 77.74%)                  |
| <i>rpiA</i> | Ribose-5-phosphate isomerase        | 5.3.1.6  | NSCAC<br>1520 | <i>Nitrosococcus oceani</i> ATCC 19707 / NCIMB 11848 (Q3J7S6, 85%)                | <i>Nitrosococcus oceani</i> AFC27 (B6C4Q6, 85%)                       |
| <i>prkB</i> | Phosphoribulokinase                 | 2.7.1.19 | NSCAC<br>0197 | <i>Sinorhizobium medicae</i> WSM419 (P56887, 61.38%)                              | <i>Nitrosococcus halophilus</i> Nc4 (D5C1E0, 86.76%)                  |
| <i>tal</i>  | Transaldolase                       | 2.2.1.2  | NSCAC<br>0980 | <i>Nostoc</i> sp. PCC 7120 / UTEX 2576 (P48993, 50.27%)                           | <i>Nitrosococcus oceani</i> ATCC 19707 / NCIMB 11848 (Q3JEE7, 62.16%) |
|             | <b>Pentose Phosphate pathway</b>    |          |               |                                                                                   |                                                                       |
| <i>zwf</i>  | Glucose-6-phosphate 1-dehydrogenase | 1.1.1.49 | NSCAC<br>1177 | <i>Synechococcus elongatus</i> PCC 7942 (P29686, 47.86%)                          | <i>Nitrosococcus oceani</i> ATCC 19707 / NCIMB 11848 (Q3J9H4, 68.32%) |
| <i>pgl</i>  | 6-phosphogluconolactonase           | 3.1.1.31 | NSCAC<br>0942 | <i>Nostoc</i> sp. PCC 7120 / UTEX 2576 (P46016, 38.24%)                           | <i>Nitrosococcus halophilus</i> Nc4 (D5BZ91, 59.83%)                  |
| <i>gnd</i>  | 6-phosphogluconate dehydrogenase    | 1.1.1.44 | NSCAC<br>1176 | <i>Lactococcus lactis</i> subsp. <i>lactis</i> IL1403 (Q9CHU6, 47.69%)            | <i>Nitrosococcus halophilus</i> Nc4 (D5BY03, 66.67%)                  |
| <i>rpe</i>  | D-ribulose-5-phosphate 3-epimerase  | 5.1.3.1  | NSCAC<br>1267 | <i>Haemophilus influenzae</i> ATCC 51907 / DSM 11121 / KW20 / Rd (P44756, 78.38%) | <i>Nitrosococcus oceani</i> AFC27 (B6C0A2, 83.78%)                    |
| <i>rpiA</i> | ribose 5-phosphate isomerase A      | 5.3.1.6  | NSCAC<br>1520 | <i>Nitrosococcus oceani</i> ATCC 19707 / NCIMB 11848 (Q3J7S6, 85%)                | <i>Nitrosococcus oceani</i> AFC27 (B6C4Q6, 85%)                       |
| <i>tktA</i> | Transketolase                       | 2.2.1.1  | NSCAC<br>0209 | <i>Escherichia coli</i> K12 (P27302, 70.48%)                                      | <i>Nitrosococcus halophilus</i> Nc4 (D5C1C5, 77.74%)                  |
| <i>tal</i>  | Transaldolase                       | 2.2.1.2  | NSCAC<br>0980 | <i>Nostoc</i> sp. PCC 7120 / UTEX 2576 (P48993, 50.27%)                           | <i>Nitrosococcus oceani</i> ATCC 19707 / NCIMB 11848 (Q3JEE7, 62.16%) |
| <i>pgi</i>  | Glucose-6-phosphate isomerase       | 5.3.1.9  | NSCAC<br>1119 | <i>Nitrosococcus oceani</i> ATCC 19707 / NCIMB 11848 (Q3JCN1, 70.46%)             | <i>Nitrosococcus halophilus</i> Nc4 (D5BZ55, 73.01%)                  |
| <i>fbp</i>  | Fructose-1,6-bisphosphatase class 1 | 3.1.3.11 | NSCAC<br>0004 | <i>Nitrosococcus oceani</i> ATCC 19707 / NCIMB 11848 (Q3JF33, 74.77%)             | <i>Nitrosococcus halophilus</i> Nc4 (D5C445, 76.28%)                  |
| <i>fba</i>  | Fructose-bisphosphate aldolase      | 4.1.2.13 | NSCAC<br>0213 | <i>Pseudomonas stutzeri</i> (O87796, 76.27%)                                      | <i>Nitrosococcus halophilus</i> Nc4 (D5C1C1, 88.7%)                   |
|             | <b>TCA cycle</b>                    |          |               |                                                                                   |                                                                       |
| <i>gltA</i> | Citrate synthase                    | 2.3.3.1  | NSCAC<br>1482 | <i>Acidithiobacillus ferrooxidans</i> (P51045 50.92%)                             | <i>Nitrosococcus watsoni</i> C-113 (D8KAD9, 59.02%)                   |
| <i>acnA</i> | Aconitate hydratase                 | 4.2.1.3  | NSCAC<br>0758 | <i>Legionella pneumophila</i> (P37032, 58.4%)                                     | <i>Halorhodospira halophila</i> DSM 244 / SL1 (A1WWW1, 60.57%)        |
| <i>icd</i>  | Isocitrate dehydrogenase            | 1.1.1.42 | NSCAC<br>0452 | <i>Coxiella burnetii</i> RSA 493 (Q9ZH99, 68.27%)                                 | <i>Nitrosococcus halophilus</i> Nc4 (D5BWG2, 74.88%)                  |
| <i>sucD</i> | Succinyl-CoA ligase subunit alpha   | 6.2.1.5  | NSCAC<br>1476 | <i>Rickettsia felis</i> ATCC VR-1525 / URRWXCAl2 (Q4ULQ8, 70%)                    | <i>Nitrosococcus halophilus</i> Nc4 (D5BWC3, 78.2%)                   |
| <i>sucC</i> | Succinyl-CoA ligase subunit beta    | 6.2.1.5  | NSCAC<br>1477 | <i>Thioalkalivibrio</i> sp. HL-EbGR7 (B8GN38, 55.7%)                              | <i>Nitrosococcus halophilus</i> Nc4 (D5BWC2, 64.68%)                  |
| <i>fumC</i> | Fumarate hydratase class II         | 4.2.1.2  | NSCAC<br>0890 | <i>Coxiella burnetii</i> RSA 493 (Q83CL8, 61.63%)                                 | <i>Nitrosococcus watsoni</i> C-113 (D8K679, 71.03%)                   |

|             |                                          |          |               |                                                                                      |                                                          |
|-------------|------------------------------------------|----------|---------------|--------------------------------------------------------------------------------------|----------------------------------------------------------|
| <i>maeB</i> | Malic enzyme                             | 1.1.1.40 | NSCAC<br>0061 | <i>Rhizobium meliloti</i> 1021 (O30808, 53.25%)                                      | <i>Nitrosococcus halophilus</i> Nc4 (D5C3J9, 69.63%)     |
|             | <b>Glycolysis / Gluconeogenesis</b>      |          |               |                                                                                      |                                                          |
| <i>pgm</i>  | Phosphoglucomutase                       | 5.4.2.2  | NSCAC<br>1039 | <i>Rhizobium radiobacter</i> (P39671, 58.2%)                                         | <i>Nitrosococcus watsoni</i> C-113 (D8K5X6, 68.93%)      |
| <i>pgi</i>  | Glucose-6-phosphate isomerase            | 5.3.1.9  | NSCAC<br>1119 | <i>Nitrosococcus oceani</i> ATCC 19707 / NCIMB 11848 (Q3JCN1, 70.46%)                | <i>Nitrosococcus halophilus</i> Nc4 (D5BZ55, 73.01%)     |
| <i>pfp</i>  | Phosphofruktokinase                      | 2.7.1.90 | NSCAC<br>1402 | <i>Dictyoglomus thermophilum</i> (Q9KH71, 27.49%)                                    | <i>Nitrosococcus halophilus</i> Nc4 (D5BW42, 78.31%)     |
| <i>tpiA</i> | Triosephosphate isomerase                | 5.3.1.1  | NSCAC<br>0233 | <i>Nitrosococcus oceani</i> ATCC 19707 / NCIMB 11848 (Q3J827, 65.74%)                | <i>Nitrosococcus halophilus</i> Nc4 (D5C2P7, 66.14%)     |
| <i>gap</i>  | Glyceraldehyde-3-phosphate dehydrogenase | 1.2.1.12 | NSCAC<br>0210 | <i>Cupriavidus necator</i> ATCC 17699 / H16 / DSM 428 / Stanier 337 (P50322, 74.48%) | <i>Nitrosococcus halophilus</i> Nc4 (D5C1C4, 83.68%)     |
| <i>pgk</i>  | Phosphoglycerate kinase                  | 2.7.2.3  | NSCAC<br>0211 | <i>Nitrosococcus oceani</i> ATCC 19707 / NCIMB 11848 (Q3J7E3, 77.44%)                | <i>Nitrosococcus halophilus</i> Nc4 (D5C1C3, 80.41%)     |
| <i>eno</i>  | Enolase                                  | 4.2.1.11 | NSCAC<br>0796 | <i>Nitrosococcus oceani</i> ATCC 19707 / NCIMB 11848 (Q3JCT1, 71.46%)                | <i>Nitrosococcus halophilus</i> Nc4 (D5BX72, 73.76%)     |
| <i>pyk</i>  | Pyruvate kinase                          | 2.7.1.40 | NSCAC<br>0974 | <i>Bacillus subtilis</i> 168 (P80885, 39.62%)                                        | <i>Nitrosococcus watsoni</i> C-113 (D8K7K1, 62.95%)      |
| <i>glk</i>  | Glucokinase                              | 2.7.1.2  | NSCAC<br>0941 | <i>Nostoc punctiforme</i> ATCC 29133 / PCC 73102 (B2J224, 45.77%)                    | <i>Nitrosococcus halophilus</i> Nc4 (D5BZ92, 68.84%)     |
| <i>fbp</i>  | Fructose-1,6-bisphosphatase              | 3.1.3.11 | NSCAC<br>0004 | <i>Nitrosococcus oceani</i> ATCC 19707 / NCIMB 11848 (Q3JF33, 74.77%)                | <i>Nitrosococcus halophilus</i> Nc4 (D5C445, 76.28%)     |
| <i>fba</i>  | Fructose-bisphosphate aldolase           | 4.1.2.13 | NSCAC<br>0213 | <i>Pseudomonas stutzeri</i> (O87796, 76.27%)                                         | <i>Nitrosococcus halophilus</i> Nc4 (D5C1C1, 88.7%)      |
| <i>gpmA</i> | Phosphoglyceromutase                     | 5.4.2.11 | NSCAC<br>0704 | <i>Nitrosococcus oceani</i> ATCC 19707 / NCIMB 11848 (Q3JBA8, 74.67%)                | <i>Nitrosococcus watsoni</i> C-113 (D8K6N5, 74.78%)      |
| <i>ppc</i>  | Phosphoenolpyruvate carboxylase          | 4.1.1.31 | NSCAC<br>1317 | <i>Ralstonia solanacearum</i> GMI1000 (Q8XWW2, 36.33%)                               | <i>Nitrosococcus halophilus</i> Nc4 (D5C581, 72.44%)     |
|             | <b>Carbon storage</b>                    |          |               |                                                                                      |                                                          |
| <i>glgA</i> | Glycogen synthase                        | 2.4.1.21 | NSCAC<br>1316 | <i>Nitrosococcus oceani</i> ATCC 19707 / NCIMB 11848 (Q3JD12, 61.75%)                | <i>Nitrosococcus halophilus</i> Nc4 (D5C582, 63.83%)     |
|             | <b>Mannose / Fructose metabolism</b>     |          |               |                                                                                      |                                                          |
| <i>fbp</i>  | Fructose-1,6-bisphosphatase class 1      | 3.1.3.11 | NSCAC<br>0004 | <i>Nitrosococcus oceani</i> ATCC 19707 / NCIMB 11848 (Q3JF33, 74.77%)                | <i>Nitrosococcus halophilus</i> Nc4 (D5C445, 76.28%)     |
| <i>mak</i>  | Mannofruktokinase                        | 2.7.1.4  | NSCAC<br>0194 | <i>Escherichia coli</i> K12 (P23917, 55.18%)                                         | <i>Sulfuricella denitrificans</i> skB26 (S6B2M3, 67.34%) |
| <i>fba</i>  | Fructose-bisphosphate aldolase           | 4.1.2.13 | NSCAC<br>0213 | <i>Pseudomonas stutzeri</i> (O87796, 76.27%)                                         | <i>Nitrosococcus halophilus</i> Nc4 (D5C1C1, 88.7%)      |
| <i>tpiA</i> | Triosephosphate isomerase                | 5.3.1.1  | NSCAC<br>0233 | <i>Nitrosococcus oceani</i> ATCC 19707 / NCIMB 11848 (Q3J827, 65.74%)                | <i>Nitrosococcus halophilus</i> Nc4 (D5C2P7, 66.14%)     |



| <i>fcl</i>                                | GDP-L-fucose synthase                                                 | 1.1.1.271              | NSCAC<br>0511    | <i>Arabidopsis thaliana</i> (Q9LMU0, 60.13%)                                                                  | <i>Nitrosococcus watsoni</i> C-113 (D8K579, 75.74%)      |
|-------------------------------------------|-----------------------------------------------------------------------|------------------------|------------------|---------------------------------------------------------------------------------------------------------------|----------------------------------------------------------|
| <i>gmd</i>                                | GDP-D-mannose dehydratase                                             | 4.2.1.47               | NSCAC<br>0859    | <i>Vibrio cholerae</i> (Q56598, 69.32%)                                                                       | <i>Nitrosococcus watsoni</i> C-113 (D8K6H6, 80.16%)      |
| <i>manC</i>                               | Mannose-1-phosphate guanylyltransferase/mannose-6-phosphate isomerase | 2.7.7.13,<br>5.3.1.8   | NSCAC<br>1259    | <i>Xanthomonas campestris</i> pv. <i>campestris</i> B100 (B0RVK6, 56.07%)                                     | <i>Nitrosococcus watsoni</i> C-113 (D8KB73, 68.65%)      |
| <i>mpgI</i>                               | Mannose-1-phosphate guanyltransferase                                 | 2.7.7.13               | NSCAC<br>1309    | <i>Yarrowia lipolytica</i> CLIB 122 / E 150 (Q6CCU3, 30.74%)                                                  | <i>Nitrosococcus halophilus</i> Nc4 (D5BV07, 68.84%)     |
| <i>pfp</i>                                | Phosphofructokinase                                                   | 2.7.1.90               | NSCAC<br>1402    | <i>Dictyoglomus thermophilum</i> (Q9KH71, 27.49%)                                                             | <i>Nitrosococcus halophilus</i> Nc4 (D5BW42, 78.31%)     |
| <i>khk</i>                                | Ketohexokinase                                                        | 2.7.1.3                | NSCAC<br>1404    | <i>Homo sapiens</i> (P50053, 35.84%)                                                                          | <i>Nitrosococcus halophilus</i> Nc4 (D5BW40, 55.21%)     |
|                                           | putative UDP-glucose/GDP-mannose dehydrogenase                        | 1.1.1.22,<br>1.1.1.132 | NSCAC<br>1492    | <i>Salmonella typhi</i> (Q04972, 61.85%)                                                                      | <i>Nitrosococcus halophilus</i> Nc4 (D5BW99, 81.88%)     |
| <i>algC</i>                               | Phosphomannomutase/phosphoglucomutase                                 | 5.4.2.2,<br>5.4.2.8    | NSCAC<br>1698    | <i>Pseudomonas aeruginosa</i> ATCC 15692 / PAO1 / 1C / PRS 101 / LMG 12228 (P26276, 56.46%)                   | <i>Nitrosococcus halophilus</i> Nc4 (D5C3B0, 68.16%)     |
| <b>Aminoacid metabolism</b>               |                                                                       |                        |                  |                                                                                                               |                                                          |
| <b>Aspartate / Asparagine / Glutamate</b> |                                                                       |                        |                  |                                                                                                               |                                                          |
| Gene                                      | Product                                                               | EC no.                 | CDS <sup>a</sup> | Best BLAST hit in SwissProt <sup>b</sup>                                                                      | Best BLAST hit in TrEMBL <sup>c</sup>                    |
| <i>carA</i>                               | Carbamoyl-phosphate synthase, small subunit                           | 6.3.5.5                | NSCAC<br>0226    | <i>Thioalkalivibrio</i> sp. HL-EbGR7 (B8GNX4, 66.22%)                                                         | <i>Nitrosococcus halophilus</i> Nc4 (D5C2Q5, 73.49%)     |
| <i>carB</i>                               | Carbamoyl-phosphate synthase, large subunit                           | 6.3.5.5                | NSCAC<br>0227    | <i>Pseudomonas syringae</i> pv. <i>tomato</i> DC3000 (Q87WP4, 69.71%)                                         | <i>Nitrosococcus halophilus</i> Nc4 (D5C2Q4, 79.79%)     |
| <i>asnB</i>                               | Asparagine synthetase                                                 | 6.3.5.4                | NSCAC<br>1330    | <i>Bacillus subtilis</i> 168 (P54420, 26.61%)                                                                 | <i>Sulfuricella denitrificans</i> skB26 (S6B8Y8, 46.02%) |
| <i>aspC</i>                               | Aspartate aminotransferase                                            | 2.6.1.1                | NSCAC<br>1014    | <i>Rickettsia bellii</i> RML369-C (Q1RGV0, 53.71%)                                                            | <i>Nitrosococcus halophilus</i> Nc4 (D5C014, 75.57%)     |
| <i>asd</i>                                | Aspartate-semialdehyde dehydrogenase                                  | 1.2.1.11               | NSCAC<br>1076    | <i>Legionella pneumophila</i> (O31219, 65%)                                                                   | <i>Nitrosococcus halophilus</i> Nc4 (D5C3U9, 79.71%)     |
| <i>pyrB</i>                               | Aspartate carbamoyltransferase                                        | 2.1.3.2                | NSCAC<br>0268    | <i>Nitrosococcus oceani</i> ATCC 19707 / NCIMB 11848 (Q3JE55, 71.79%)                                         | <i>Nitrosococcus halophilus</i> Nc4 (D5C4Z0, 73.31%)     |
| <i>panD</i>                               | Aspartate 1-decarboxylase                                             | 4.1.1.11               | NSCAC<br>1130    | <i>Nitrosococcus oceani</i> ATCC 19707 / NCIMB 11848 (Q3JCP7, 70.09%)                                         | <i>Nitrosococcus halophilus</i> Nc4 (D5BZ33, 70.94%)     |
| <i>glnA</i>                               | Glutamine synthetase                                                  | 6.3.1.2                | NSCAC<br>1505    | <i>Methylococcus capsulatus</i> ATCC 33009 / NCIMB 11132 / Bath (P15124, 75.69%)                              | <i>Nitrosococcus halophilus</i> Nc4 (D5BW85, 84.65%)     |
| <i>gdh</i>                                | Glutamate dehydrogenase                                               | 1.4.1.4                | NSCAC<br>0541    | <i>Corynebacterium glutamicum</i> ATCC 13032 / DSM 20300 / JCM 1318 / LMG 3730 / NCIMB 10025 (P31026, 65.23%) | <i>Nitrosococcus watsoni</i> C-113 (D8K8F3, 76.46%)      |
| <i>proB</i>                               | Glutamate 5-kinase                                                    | 2.7.2.11               | NSCAC<br>1710    | <i>Nitrosococcus oceani</i> ATCC 19707 / NCIMB 11848 (Q3J6R9, 68.27%)                                         | <i>Nitrosococcus halophilus</i> Nc4 (D5C4A5, 67.73%)     |
| <i>mptN</i>                               | Alpha-L-glutamate ligase                                              | 6.3.2.33               | NSCAC<br>0081    | <i>Methanocaldococcus jannaschii</i> ATCC 43067 / DSM 2661 / JAL-1 / JCM 10045 / NBRC 100440 (Q58037, 33.45%) | <i>Nitrosococcus halophilus</i> Nc4 (D5C3I2, 58.92%)     |

|             |                                              |          |               |                                                                                                               |                                                                       |
|-------------|----------------------------------------------|----------|---------------|---------------------------------------------------------------------------------------------------------------|-----------------------------------------------------------------------|
| <i>gltX</i> | Glutamate-tRNA ligase                        | 6.1.1.17 | NSCAC<br>0538 | <i>Nitrosococcus oceani</i> ATCC 19707 / NCIMB 11848 (Q3J8Y8, 63.73%)                                         | <i>Nitrosococcus halophilus</i> Nc4 (D5BYC6, 64.87%)                  |
| <i>gshA</i> | Glutamate-cysteine ligase                    | 6.3.2.2  | NSCAC<br>0994 | <i>Alcanivorax borkumensis</i> SK2 / ATCC 700651 / DSM 11573 (Q0VSY7, 46.93%)                                 | <i>Nitrosococcus halophilus</i> Nc4 (D5BZX8, 62.96%)                  |
| <i>hemL</i> | Glutamate-1-semialdehyde aminotransferase    | 5.4.3.8  | NSCAC<br>1655 | <i>Nitrosococcus oceani</i> ATCC 19707 / NCIMB 11848 (Q3JDH7, 75.24%)                                         | <i>Nitrosococcus halophilus</i> Nc4 (D5C2V8, 75.82%)                  |
| <i>glnE</i> | Glutamate-ammonia-ligase adenylyltransferase | 2.7.7.42 | NSCAC<br>1683 | <i>Nitrosococcus oceani</i> ATCC 19707 / NCIMB 11848 (Q3JES8, 55.33%)                                         | <i>Nitrosococcus halophilus</i> Nc4 (D5C4W0, 55.97%)                  |
| <i>argB</i> | Acetylglutamate kinase                       | 2.7.2.8  | NSCAC<br>1697 | <i>Nitrosococcus oceani</i> ATCC 19707 / NCIMB 11848 (Q3J6V9, 75%)                                            | <i>Nitrosococcus oceani</i> AFC27 (B6C5S6, 75%)                       |
|             | <b>Glycine / Serine / Threonine</b>          |          |               |                                                                                                               |                                                                       |
| <i>hprA</i> | Glycerate dehydrogenase                      | 1.1.1.29 | NSCAC<br>0419 | <i>Methylobacterium extorquens</i> ATCC 14718 / DSM 1338 / AM1 (Q59516, 43.95%)                               | <i>Nitrosococcus halophilus</i> Nc4 (D5BXV7, 68.55%)                  |
| <i>GLYK</i> | D-glycerate 3-kinase                         | 2.7.1.31 | NSCAC<br>0567 | <i>Schizosaccharomyces pombe</i> 972 / ATCC 24843 (Q9UUH3, 32.08)                                             | <i>Nitrosococcus oceani</i> ATCC 19707 / NCIMB 11848 (Q3JDS9, 48.74%) |
| <i>serA</i> | D-3-phosphoglycerate dehydrogenase           | 1.1.1.95 | NSCAC<br>0879 | <i>Methanocaldococcus jannaschii</i> ATCC 43067 / DSM 2661 / JAL-1 / JCM 10045 / NBRC 100440 (Q58424, 37.14%) | <i>Nitrosococcus halophilus</i> Nc4 (D5BWP9, 71.06%)                  |
| <i>serB</i> | Phosphoserine phosphatase                    | 3.1.3.3  | NSCAC<br>1281 | <i>Haemophilus influenzae</i> ATCC 51907 / DSM 11121 / KW20 / Rd (P44997, 42.96%)                             | <i>Nitrosococcus oceani</i> ATCC 19707 / NCIMB 11848 (Q3J889, 56.43%) |
| <i>serC</i> | Phosphoserine aminotransferase               | 2.6.1.52 | NSCAC<br>0878 | <i>Thiobacillus denitrificans</i> ATCC 25259 (Q3SK88, 64.8%)                                                  | <i>Nitrosococcus halophilus</i> Nc4 (D5BWP8, 73.89%)                  |
| <i>hom</i>  | Homoserine dehydrogenase                     | 1.1.1.3  | NSCAC<br>1243 | <i>Pseudomonas aeruginosa</i> ATCC 15692 / PAO1 / IC / PRS 101 / LMG 12228 (P29365, 62.82%)                   | <i>Nitrosococcus halophilus</i> Nc4 (D5BX24, 75.06%)                  |
| <i>psd</i>  | Phosphatidylserine decarboxylase proenzyme   | 4.1.1.65 | NSCAC<br>0144 | <i>Nitrosococcus oceani</i> ATCC 19707 / NCIMB 11848 (Q3J754, 60.96%)                                         | <i>Nitrosococcus halophilus</i> Nc4 (D5BVJ8, 63.7%)                   |
| <i>metA</i> | Homoserine O-succinyltransferase             | 2.3.1.46 | NSCAC<br>0619 | <i>Vibrio fischeri</i> MJ11 (B5FA49, 34.22%)                                                                  | <i>Nitrosococcus halophilus</i> Nc4 (D5C1M0, 78.03%)                  |
| <i>metZ</i> | O-succinylhomoserine sulfhydrylase           | 2.5.1.-  | NSCAC<br>1004 | <i>Pseudomonas aeruginosa</i> ATCC 15692 / PAO1 / IC / PRS 101 / LMG 12228 (P55218, 61.66%)                   | <i>Nitrosococcus halophilus</i> Nc4 (D5BZZ8, 79.8%)                   |
| <i>glyA</i> | Serine hydroxymethyltransferase              | 2.1.2.1  | NSCAC<br>0423 | <i>Nitrosococcus oceani</i> ATCC 19707 / NCIMB 11848 (Q3J9K8, 83.69%)                                         | <i>Nitrosococcus watsoni</i> C-113 (D8K532, 84.17%)                   |
|             | Aspartate/glutamate/uridylate kinase         |          | NSCAC<br>0076 | <i>Arabidopsis thaliana</i> (Q93Y07, 31.37%)                                                                  | <i>Nitrosococcus halophilus</i> Nc4 (D5C3I9, 51.83%)                  |
| <i>asd</i>  | Aspartate-semialdehyde dehydrogenase         | 1.2.1.11 | NSCAC<br>1076 | <i>Legionella pneumophila</i> (O31219, 65%)                                                                   | <i>Nitrosococcus halophilus</i> Nc4 (D5C3U9, 79.71%)                  |
| <i>thrC</i> | Threonine synthase                           | 4.2.3.1  | NSCAC<br>1242 | <i>Synechocystis</i> sp. PCC 6803 / Kazusa (P74193, 56.12%)                                                   | <i>Nitrosococcus halophilus</i> Nc4 (D5BX25, 77.99%)                  |
|             | <b>Cysteine / Methionine</b>                 |          |               |                                                                                                               |                                                                       |
| <i>cysE</i> | Serine acetyltransferase                     | 2.3.1.30 | NSCAC<br>0752 | <i>Azotobacter chroococcum</i> mcd 1 (P23145, 53.24%)                                                         | <i>Nitrosococcus halophilus</i> Nc4 (D5C3R4, 69.5%)                   |
| <i>cysM</i> | Cysteine synthase                            | 2.5.1.47 | NSCAC<br>0395 | <i>Pseudomonas aeruginosa</i> ATCC 15692 / PAO1 / IC / PRS 101 / LMG 12228 (Q9I526, 66.44%)                   | <i>Nitrosococcus watsoni</i> C-113 (D8K8M1, 76.61%)                   |



|             |                                                                        |           |               |                                                                                             |                                                      |
|-------------|------------------------------------------------------------------------|-----------|---------------|---------------------------------------------------------------------------------------------|------------------------------------------------------|
| <i>iscS</i> | Cysteine desulfurase                                                   | 2.8.1.7   | NSCAC<br>0753 | <i>Dictyoglomus turgidum</i> Z-1310 / DSM 6724 (B8DZS1, 44.3%)                              | <i>Nitrosococcus watsoni</i> C-113 (D8K661, 64.29%)  |
| <i>icmt</i> | Isoprenylcysteine carboxyl methyltransferase                           | 2.1.1.100 | NSCAC<br>1030 | <i>Alcaligenes xylosoxydans</i> (Q44587, 28.41%)                                            | <i>Nitrosococcus halophilus</i> Nc4 (D5C4M2, 57.75%) |
| <i>metE</i> | 5-methyltetrahydropteroyltriglutamate-homocysteine S-methyltransferase | 2.1.1.14  | NSCAC<br>0673 | <i>Nitrosococcus oceani</i> ATCC 19707 / NCIMB 11848 (Q3JAD5, 72.66%)                       | <i>Nitrosococcus halophilus</i> Nc4 (D5C080, 73.18%) |
| <i>metK</i> | S-adenosylmethionine synthase                                          | 2.5.1.6   | NSCAC<br>1528 | <i>Nitrosococcus oceani</i> ATCC 19707 / NCIMB 11848 (Q3J7R5, 83.51%)                       | <i>Nitrosococcus halophilus</i> Nc4 (D5BW58, 84.79%) |
|             | <b>Valine / Leucine / Isoleucine</b>                                   |           |               |                                                                                             |                                                      |
| <i>CHAI</i> | L-threonine ammonia-lyase                                              | 4.3.1.19  | NSCAC<br>1519 | <i>Burkholderia multivorans</i> ATCC 17616 / 249 (P53607, 56.04%)                           | <i>Nitrosococcus halophilus</i> Nc4 (D5BW70, 75.51%) |
| <i>ilvC</i> | Ketol-acid reductoisomerase                                            | 1.1.1.86  | NSCAC<br>1286 | <i>Nitrosococcus oceani</i> ATCC 19707 / NCIMB 11848 (Q3J875, 85.5%)                        | <i>Nitrosococcus oceani</i> AFC27 (B6C687, 85.5%)    |
| <i>ilvH</i> | Acetolactate synthase, small subunit                                   | 2.2.1.6   | NSCAC<br>1287 | <i>Escherichia coli</i> K12 (P00894, 56.71%)                                                | <i>Nitrosococcus halophilus</i> Nc4 (D5BWV5, 80.37%) |
| <i>ilvI</i> | Acetolactate synthase, large subunit                                   | 2.2.1.6   | NSCAC<br>1288 | <i>Haemophilus influenzae</i> ATCC 51907 / DSM 11121 / KW20 / Rd (P45261, 57.88%)           | <i>Nitrosococcus halophilus</i> Nc4 (D5BWV4, 76.75%) |
| <i>ilvD</i> | Dihydroxy-acid dehydratase                                             | 4.2.1.9   | NSCAC<br>1351 | <i>Nitrosococcus oceani</i> ATCC 19707 / NCIMB 11848 (Q3J9N3, 82.47%)                       | <i>Nitrosococcus watsoni</i> C-113 (D8K6Y1, 82.63%)  |
| <i>ilvE</i> | Branched-chain-amino-acid aminotransferase                             | 2.6.1.42  | NSCAC<br>1682 | <i>Pseudomonas aeruginosa</i> ATCC 15692 / PAO1 / 1C / PRS 101 / LMG 12228 (O86428, 67.33%) | <i>Nitrosococcus watsoni</i> C-113 (D8K8A8, 81.55%)  |
| <i>leuA</i> | 2-isopropylmalate synthase                                             | 2.3.3.13  | NSCAC<br>1284 | <i>Nitrosococcus oceani</i> ATCC 19707 / NCIMB 11848 (Q3J877, 75.54%)                       | <i>Nitrosococcus halophilus</i> Nc4 (D5BWV8, 76.91%) |
| <i>leuB</i> | 3-isopropylmalate dehydrogenase                                        | 1.1.1.85  | NSCAC<br>1078 | <i>Nitrosococcus oceani</i> ATCC 19707 / NCIMB 11848 (Q3JCC4, 78.65%)                       | <i>Nitrosococcus watsoni</i> C-113 (D8K7H6, 79.55%)  |
| <i>leuD</i> | 3-isopropylmalate dehydratase, small subunit                           | 4.2.1.33  | NSCAC<br>1079 | <i>Nitrosococcus oceani</i> ATCC 19707 / NCIMB 11848 (Q3JCC5, 69.95%)                       | <i>Nitrosococcus halophilus</i> Nc4 (D5C3U7, 71.83%) |
| <i>leuC</i> | 3-isopropylmalate dehydratase, large subunit                           | 4.2.1.33  | NSCAC<br>0131 | <i>Nitrosococcus oceani</i> ATCC 19707 / NCIMB 11848 (Q3J716, 82.66%)                       | <i>Nitrosococcus halophilus</i> Nc4 (D5BUS1, 83.08%) |
|             | <b>Lysine / Arginine / Proline</b>                                     |           |               |                                                                                             |                                                      |
| <i>lysA</i> | Diaminopimelate decarboxylase                                          | 4.1.1.20  | NSCAC<br>0103 | <i>Vibrio cholerae</i> serotype O1 ATCC 39315 / El Tor Inaba N16961 (Q9KVL7, 63.88%)        | <i>Nitrosococcus oceani</i> AFC27 (B6C3A1, 70.84%)   |
| <i>dapF</i> | Diaminopimelate epimerase                                              | 5.1.1.7   | NSCAC<br>0105 | <i>Nitrosococcus oceani</i> ATCC 19707 / NCIMB 11848 (Q3JEA2, 63.04%)                       | <i>Nitrosococcus halophilus</i> Nc4 (D5C3E8, 65.58%) |
| <i>dapE</i> | Succinyl-diaminopimelate desuccinylase                                 | 3.5.1.18  | NSCAC<br>0570 | <i>Nitrosococcus oceani</i> ATCC 19707 / NCIMB 11848 (Q3J9B0, 66.13%)                       | <i>Nitrosococcus halophilus</i> Nc4 (D5BXS2, 66.93%) |
| <i>dapB</i> | 4-hydroxy-tetrahydrodipicolinate reductase                             | 1.17.1.8  | NSCAC<br>0208 | <i>Nitrosococcus oceani</i> ATCC 19707 / NCIMB 11848 (Q3J7E0, 61.36%)                       | <i>Nitrosococcus watsoni</i> C-113 (D8K9G0, 64.39%)  |
| <i>dapD</i> | 2,3,4,5-tetrahydropyridine-2,6-dicarboxylate N-succinyltransferase     | 2.3.1.117 | NSCAC<br>0571 | <i>Nitrosococcus oceani</i> ATCC 19707 / NCIMB 11848 (Q3J9B1, 78.39%)                       | <i>Nitrosococcus halophilus</i> Nc4 (D5BXS3, 79.12%) |
| <i>asd</i>  | Aspartate-semialdehyde dehydrogenase                                   | 1.2.1.11  | NSCAC<br>1076 | <i>Legionella pneumophila</i> (O31219, 65%)                                                 | <i>Nitrosococcus halophilus</i> Nc4 (D5C3U9, 79.71%) |

|              |                                                                         |                       |               |                                                                                             |                                                                       |
|--------------|-------------------------------------------------------------------------|-----------------------|---------------|---------------------------------------------------------------------------------------------|-----------------------------------------------------------------------|
| <i>lysC</i>  | Aspartate kinase                                                        | 2.7.2.4               | NSCAC<br>1101 | <i>Pseudomonas aeruginosa</i> ATCC 15692 / PAO1 / 1C / PRS 101 / LMG 12228 (O69077, 71.57%) | <i>Nitrosococcus halophilus</i> Nc4 (D5BZJ7, 78.92%)                  |
| <i>hom</i>   | Homoserine dehydrogenase                                                | 1.1.1.3               | NSCAC<br>1243 | <i>Pseudomonas aeruginosa</i> ATCC 15692 / PAO1 / 1C / PRS 101 / LMG 12228 (P29365, 62.82%) | <i>Nitrosococcus halophilus</i> Nc4 (D5BX24, 75.06%)                  |
| <i>alaC</i>  | Aspartate aminotransferase                                              | 2.6.1.1               | NSCAC<br>1244 | <i>Escherichia coli</i> K12 (P77434, 69.95%)                                                | <i>Nitrosococcus oceani</i> ATCC 19707 / NCIMB 11848 (Q3J8D8, 84.14%) |
| <i>murF</i>  | UDP-N-acetylmuramoyl-tripeptide:D-alanyl-D-alanine ligase               | 6.3.2.10              | NSCAC<br>1421 | <i>Escherichia coli</i> K12 (P11880, 41.48%)                                                | <i>Nitrosococcus halophilus</i> Nc4 (D5BW22, 56.88%)                  |
| <i>murE</i>  | UDP-N-acetylmuramoyl-L-alanyl-D-glutamate--2,6-diaminopimelate ligase   | 6.3.2.13              | NSCAC<br>1422 | <i>Coxiella burnetii</i> RSA 493 (Q83F28, 42.07%)                                           | <i>Nitrosococcus watsoni</i> C-113 (D8K8Y2, 55.73%)                   |
| <i>proA</i>  | Gamma-glutamyl phosphate reductase                                      | 1.2.1.41              | NSCAC<br>1515 | <i>Nitrosococcus oceani</i> ATCC 19707 / NCIMB 11848 (Q3J7T1, 72.73%)                       | <i>Nitrosococcus halophilus</i> Nc4 (D5BW74, 74.4%)                   |
| <i>proC</i>  | Proline-5-carboxylate reductase                                         | 1.5.1.2               | NSCAC<br>1692 | <i>Pseudomonas aeruginosa</i> ATCC 15692 / PAO1 / 1C / PRS 101 / LMG 12228 (P22008, 44.4%)  | <i>Nitrosococcus oceani</i> AFC27 (B6C5T3, 61.07%)                    |
| <i>proB</i>  | Glutamate 5-kinase                                                      | 2.7.2.11              | NSCAC<br>1710 | <i>Nitrosococcus oceani</i> ATCC 19707 / NCIMB 11848 (Q3J6R9, 68.27%)                       | <i>Nitrosococcus halophilus</i> Nc4 (D5C4A5, 67.73%)                  |
| <i>argH</i>  | Argininosuccinate lyase                                                 | 4.3.2.1               | NSCAC<br>1756 | <i>Nitrosococcus oceani</i> ATCC 19707 / NCIMB 11848 (Q3JDS2, 80.17%)                       | <i>Nitrosococcus watsoni</i> C-113 (D8KA13, 79.7%)                    |
|              | Arginine decarboxylase                                                  |                       | NSCAC<br>0500 |                                                                                             | <i>Nitrosococcus halophilus</i> Nc4 (D5BWL0, 47.44%)                  |
| <i>argJ</i>  | Arginine biosynthesis bifunctional protein ArgJ                         | 2.3.1.1,<br>2.3.1.35  | NSCAC<br>1406 | <i>Nitrosococcus oceani</i> ATCC 19707 / NCIMB 11848 (Q3J7A0, 65.19%)                       | <i>Nitrosococcus halophilus</i> Nc4 (D5BW38, 65.43%)                  |
|              | <b>Histidine</b>                                                        |                       |               |                                                                                             |                                                                       |
| <i>hisC</i>  | Histidinol-phosphate aminotransferase                                   | 2.6.1.9               | NSCAC<br>1567 | <i>Nitrosococcus oceani</i> ATCC 19707 / NCIMB 11848 (Q3J7H2, 66.57%)                       | <i>Nitrosococcus oceani</i> AFC27 (B6C529, 66.57%)                    |
| <i>hisD</i>  | Histidinol dehydrogenase                                                | 1.1.1.23              | NSCAC<br>1568 | <i>Nitrosococcus oceani</i> ATCC 19707 / NCIMB 11848 (Q3J7H1, 73.26%)                       | <i>Nitrosococcus halophilus</i> Nc4 (D5BVB8, 73.26%)                  |
| <i>hisG</i>  | ATP phosphoribosyltransferase                                           | 2.4.2.17              | NSCAC<br>1569 | <i>Nitrosococcus oceani</i> ATCC 19707 / NCIMB 11848 (Q3J7H0, 75.12%)                       | <i>Nitrosococcus watsoni</i> C-113 (D8K9J0, 75.59%)                   |
| <i>hisE</i>  | Phosphoribosyl-ATP pyrophosphatase/Phosphoribosyl-AMP cyclohydrolase    | 3.6.1.31,<br>3.5.4.19 | NSCAC<br>1731 | <i>Nitrosococcus oceani</i> ATCC 19707 / NCIMB 11848 (Q3J6P9, 66.99%)                       | <i>Nitrosococcus halophilus</i> Nc4 (D5C484, 70.87%)                  |
| <i>hisIE</i> | Phosphoribosyl-AMP cyclohydrolase/phosphoribosyl-ATP pyrophosphatase    | 3.5.4.19,<br>3.6.1.31 | NSCAC<br>1730 | <i>Nitrosococcus oceani</i> ATCC 19707 / NCIMB 11848 (Q3J6Q0, 66.67%)                       | <i>Nitrosococcus halophilus</i> Nc4 (D5C485, 65.89%)                  |
| <i>hisB</i>  | Imidazoleglycerol-phosphate dehydratase                                 | 4.2.1.19              | NSCAC<br>1726 | <i>Nitrosococcus oceani</i> ATCC 19707 / NCIMB 11848 (Q3J6Q4, 72.82%)                       | <i>Nitrosococcus halophilus</i> Nc4 (D5C489, 77.33%)                  |
| <i>hisH</i>  | Imidazole glycerol phosphate synthase, subunit HisH                     | 2.4.2.-               | NSCAC<br>1727 | <i>Nitrosococcus oceani</i> ATCC 19707 / NCIMB 11848 (Q3J6Q3, 65.88%)                       | <i>Nitrosococcus halophilus</i> Nc4 (D5C488, 67.77%)                  |
| <i>hisA</i>  | Phosphoribosylformimino-5-aminoimidazole carboxamide ribotide isomerase | 5.3.1.16              | NSCAC<br>1728 | <i>Nitrosococcus oceani</i> ATCC 19707 / NCIMB 11848 (Q3J6Q2, 80.08%)                       | <i>Nitrosococcus halophilus</i> Nc4 (D5C487, 81.33%)                  |
| <i>hisF</i>  | Imidazole glycerol phosphate synthase, subunit HisF                     | 4.1.3.-               | NSCAC<br>1729 | <i>Nitrosococcus oceani</i> ATCC 19707 / NCIMB 11848 (Q3J6Q1, 79.3%)                        | <i>Nitrosococcus halophilus</i> Nc4 (D5C486, 81.32%)                  |

| <b>Phenylalanine / Tyrosine / Tryptophan</b> |                                                    |                    |                  |                                                                                        |                                                                       |
|----------------------------------------------|----------------------------------------------------|--------------------|------------------|----------------------------------------------------------------------------------------|-----------------------------------------------------------------------|
| <i>aroG</i>                                  | Phospho-2-dehydro-3-deoxyheptonate aldolase        | 2.5.1.54           | NSCAC 0871       | <i>Escherichia coli</i> K12 (P0AB91, 60.17%)                                           | <i>Nitrosococcus halophilus</i> Nc4 (D5BWN5, 72.78%)                  |
| <i>aroB</i>                                  | 3-dehydroquinate synthase                          | 4.2.3.4            | NSCAC 0070       | <i>Nitrosococcus oceani</i> ATCC 19707 / NCIMB 11848 (Q3JEG3, 69.38%)                  | <i>Nitrosococcus halophilus</i> Nc4 (D5C3J0, 71.07%)                  |
| <i>aroQ</i>                                  | 3-dehydroquinate dehydratase                       | 4.2.1.10           | NSCAC 1548       | <i>Nitrosococcus oceani</i> ATCC 19707 / NCIMB 11848 (Q3JC85, 70.5%)                   | <i>Nitrosococcus watsoni</i> C-113 (D8K7D6, 71.94%)                   |
| <i>aroE</i>                                  | Shikimate dehydrogenase                            | 1.1.1.25           | NSCAC 0224       | <i>Nitrosococcus oceani</i> ATCC 19707 / NCIMB 11848 (Q3J818, 60.9%)                   | <i>Nitrosococcus watsoni</i> C-113 (D5C2Q7, 61.28%)                   |
| <i>aroK</i>                                  | Shikimate kinase                                   | 2.7.1.71           | NSCAC 0069       | <i>Nitrosococcus oceani</i> ATCC 19707 / NCIMB 11848 (Q3JEG4, 59.17%)                  | <i>Nitrosococcus oceani</i> AFC27 (B6C338, 59.17%)                    |
| <i>tyrA</i>                                  | Prephenate dehydrogenase                           | 1.3.1.12           | NSCAC 0882       | <i>Zymomonas mobilis</i> subsp. <i>mobilis</i> ATCC 31821 / ZM4 / CP4 (Q04983, 41.13%) | <i>Nitrosococcus oceani</i> AFC27 (B6C2V5, 56.89%)                    |
| <i>aroA</i>                                  | 3-phosphoshikimate 1-carboxyvinyltransferase       | 2.5.1.19           | NSCAC 0883       | <i>Nitrosococcus oceani</i> ATCC 19707 / NCIMB 11848 (Q3JEN6, 70.67%)                  | <i>Nitrosococcus halophilus</i> Nc4 (D5BX27, 71.59%)                  |
| <i>aroC</i>                                  | Chorismate synthase                                | 4.2.3.5            | NSCAC 1591       | <i>Nitrosococcus oceani</i> ATCC 19707 / NCIMB 11848 (Q3J713, 82.05%)                  | <i>Nitrosococcus halophilus</i> Nc4 (D5BUS5, 82.05%)                  |
| <i>alaC</i>                                  | Aspartate aminotransferase                         | 2.6.1.1            | NSCAC 1244       | <i>Escherichia coli</i> K12 (P77434, 69.95%)                                           | <i>Nitrosococcus oceani</i> ATCC 19707 / NCIMB 11848 (Q3J8D8, 84.14%) |
| <i>hisC</i>                                  | Histidinol-phosphate aminotransferase              | 2.6.1.9            | NSCAC 1567       | <i>Nitrosococcus oceani</i> ATCC 19707 / NCIMB 11848 (Q3J7H2, 66.57%)                  | <i>Nitrosococcus oceani</i> AFC27 (B6C529, 66.57%)                    |
| <i>pheA</i>                                  | Chorismate mutase / Prephenate dehydratase         | 5.4.99.5, 4.2.1.51 | NSCAC 0880       | <i>Pseudomonas stutzeri</i> (P27603, 52.49%)                                           | <i>Nitrosococcus watsoni</i> C-113 (D8K8T7, 68.96%)                   |
| <i>trpA</i>                                  | Tryptophan synthase alpha chain                    | 4.2.1.20           | NSCAC 1067       | <i>Nitrosococcus oceani</i> ATCC 19707 / NCIMB 11848 (Q3JCB7, 69.55%)                  | <i>Nitrosococcus oceani</i> AFC27 (B6C0H6, 69.55%)                    |
| <i>trpB</i>                                  | Tryptophan synthase beta chain                     | 4.2.1.20           | NSCAC 1068       | <i>Methylococcus capsulatus</i> ATCC 33009 / NCIMB 11132 / Bath (Q604P3, 75.19%)       | <i>Nitrosococcus oceani</i> AFC27 (B6C0H5, 80.9%)                     |
| <b>Hydrogen metabolism</b>                   |                                                    |                    |                  |                                                                                        |                                                                       |
| Gene                                         | Product                                            | EC no.             | CDS <sup>a</sup> | Best BLAST hit in SwissProt <sup>b</sup>                                               | Best BLAST hit in TrEMBL <sup>c</sup>                                 |
|                                              | putative [NiFe]-hydrogenase, small subunit HyfI    |                    | NSCAC 1085       | <i>Escherichia coli</i> K12 (P16433, 42.25%)                                           | <i>Afipia</i> sp. 1NLS2 (D6V096, 79.52%)                              |
|                                              | putative [NiFe]-hydrogenase, large subunit HyfG    |                    | NSCAC 1086       | <i>Escherichia coli</i> K12 (P16431, 31.96%)                                           | <i>Afipia</i> sp. 1NLS2 (D6V095, 74.9%)                               |
|                                              | putative [NiFe]-hydrogenase, membrane subunit HyfF |                    | NSCAC 1087       | <i>Methylococcus capsulatus</i> isolate V4 (A9QPJ1, 58.99%)                            | <i>Afipia</i> sp. 1NLS2 (D6V094, 76.36%)                              |
|                                              | putative [NiFe]-hydrogenase, membrane subunit HyfE |                    | NSCAC 1088       | <i>Mycobacterium tuberculosis</i> (P64681, 28.37%)                                     | <i>Afipia</i> sp. 1NLS2 (D6V093, 78.9%)                               |
|                                              | putative [NiFe]-hydrogenase, membrane subunit HyfC |                    | NSCAC 1089       | <i>Escherichia coli</i> K12 (P77858, 33.78%)                                           | <i>Afipia</i> sp. 1NLS2 (D6V092, 79.94%)                              |
|                                              | putative [NiFe]-hydrogenase, membrane subunit HyfB |                    | NSCAC 1090       | <i>Mycobacterium tuberculosis</i> (Q10880, 34.32%)                                     | <i>Afipia</i> sp. 1NLS2 (D6V091, 71.71%)                              |

| Sulfur metabolism              |                                                        |                      |                  |                                                                       |                                                                        |
|--------------------------------|--------------------------------------------------------|----------------------|------------------|-----------------------------------------------------------------------|------------------------------------------------------------------------|
| Assimilatory sulfate reduction |                                                        |                      |                  |                                                                       |                                                                        |
| Gene                           | Product                                                | EC no.               | CDS <sup>a</sup> | Best BLAST hit in SwissProt <sup>b</sup>                              | Best BLAST hit in TrEMBL <sup>c</sup>                                  |
| <i>cysC</i>                    | Adenylyl-sulfate kinase                                | 2.7.1.25             | NSCAC_1258       | <i>Acaryochloris marina</i> MBIC 11017 (B0CAX3, 64%)                  | <i>Nitrosococcus halophilus</i> Nc4 (D5BWZ5, 71.07%)                   |
| <i>cysH</i>                    | 5'-adenylylsulfate reductase (thioredoxin)             | 1.8.4.8              | NSCAC_0382       | <i>Burkholderia cepacia</i> (Q9RFS6, 51.58%)                          | <i>Nitrosococcus oceani</i> ATCC 19707 / NCIMB 11848 (Q3J8U8, 70.48%)  |
| <i>cysD</i>                    | Sulfate adenylyltransferase, small subunit             | 2.7.7.4              | NSCAC_0383       | <i>Mycobacterium</i> sp. strain JLS (A3Q3I2, 65.55%)                  | <i>Nitrosococcus watsoni</i> C-113 (D8K7S8, 86.38%)                    |
| <i>cysN</i>                    | Sulfate adenylyltransferase, large subunit             | 2.7.7.4              | NSCAC_0384       | <i>Mycobacterium tuberculosis</i> (Q10600, 57.38%)                    | <i>Nitrosococcus halophilus</i> Nc4 (D5BVT0, 80.19%)                   |
| <i>cysJ</i>                    | Sulfite reductase [NADPH] flavoprotein, alpha subunit  | 1.8.1.2,<br>1.5.1.29 | NSCAC_0552       | <i>Bacillus subtilis</i> 168 (O32214, 52.18%)                         | <i>Nitrosococcus watsoni</i> C-113 (D8K5E5, 69.71%)                    |
| <i>cysI</i>                    | Sulfite reductase [NADPH] hemoprotein, beta subunit    | 1.8.1.2              | NSCAC_0553       | <i>Nitrosococcus oceani</i> ATCC 19707 / NCIMB 11848 (Q3JB1, 74.14%)  | <i>Nitrosococcus watsoni</i> C-113 (D8K5E6, 74.31%)                    |
|                                | Sulfate transporter / antisigma-factor antagonist STAS |                      | NSCAC_1572       | <i>Bacillus subtilis</i> 168 (P17903, 30%)                            | <i>Nitrosococcus halophilus</i> Nc4 (D5BVB3, 49.48%)                   |
| Transporters                   |                                                        |                      |                  |                                                                       |                                                                        |
| Gene                           | Product                                                | EC no.               | CDS <sup>a</sup> | Best BLAST hit in SwissProt <sup>b</sup>                              | Best BLAST hit in TrEMBL <sup>c</sup>                                  |
|                                | Heavy metal transport/detoxification protein           |                      | NSCAC_1686       | <i>Staphylococcus haemolyticus</i> (Q4L971, 35.4%)                    | <i>Nitrosococcus halophilus</i> Nc4 (D5C4V6, 67.7%)                    |
| <i>cutA</i>                    | Divalent-cation tolerance protein CutA                 |                      | NSCAC_1545       | <i>Thermus thermophilus</i> (Q7SIA8, 42.7%)                           | <i>Nitrosococcus oceani</i> ATCC 19707 / NCIMB 11848 (Q3JC82, 58.88%)  |
| <i>czcA</i>                    | Cation efflux system protein CzcA                      |                      | NSCAC_0713       | <i>Alcaligenes</i> sp. (strain CT14) (P94177, 40.17%)                 | <i>Candidatus Nitrosoglobus terrae</i> (A0A1Q2SN03, 75.7%)             |
|                                | Sodium/hydrogen exchanger                              |                      | NSCAC_1736       | <i>Escherichia coli</i> (strain K12) (P45522, 25.57%)                 | <i>Nitrosococcus halophilus</i> Nc4 (D5C477, 63.65%)                   |
| <i>yfeH</i>                    | putative sodium/bile acid symporter family (mazG-like) |                      | NSCAC_0057       | <i>Pseudomonas aeruginosa</i> (P39879, 52.81%)                        | <i>gamma proteobacterium HdN1</i> (E1VNE1, 6961.85%)                   |
| <i>trkH</i>                    | potassium transporter                                  |                      | NSCAC_0059       | <i>Nitrosococcus oceani</i> ATCC 19707 / NCIMB 11848 (Q87TN7, 53.97%) | <i>Nitrosococcus oceani</i> ATCC 19707 / NCIMB 11848 (A0A0E2Z5T5, 70%) |
| <i>trkA</i>                    | NAD-binding component of TrK potassium transporter     |                      | NSCAC_1602       | <i>Halomonas elongata</i> (E1V6C6, 61.4%)                             | <i>Nitrosococcus halophilus</i> Nc4 (D5C3D0, 75.93%)                   |
|                                | Iron permease FTR1                                     |                      | NSCAC_0606       | <i>Bacillus subtilis</i> (P39595, 27.68%)                             | <i>Candidatus Nitrosoglobus terrae</i> (A0A1Q2SNC9, 63.67%)            |
|                                | copper/silver efflux system, membrane component        |                      | NSCAC_0608       | <i>Escherichia coli</i> (Q8FK36, 45.97%)                              | <i>Candidatus Nitrosoglobus terrae</i> (A0A1Q2SN97, 68.7%)             |
| <i>corA</i>                    | Magnesium and cobalt transport                         |                      | NSCAC_0600       | <i>Thermotoga maritima</i> (Q9WZ31, 43.1%)                            | <i>Nitrosococcus halophilus</i> Nc4 (D5C2B9, 61.27%)                   |

|  |                                             |  |               |                                                                      |                                                                |
|--|---------------------------------------------|--|---------------|----------------------------------------------------------------------|----------------------------------------------------------------|
|  | MotA/TolQ/ExbB proton channel               |  | NSCAC<br>1649 | <i>Synechocystis sp.</i> (strain PCC 6803 / Kazusa) (P72604, 38.89%) | <i>Candidatus Nitrosoglobus terrae</i><br>(A0A1Q2SKN4, 75.88%) |
|  | Efflux transporter, RND family, MFP subunit |  | NSCAC<br>0609 | <i>Salmonella typhimurium</i> (Q9ZHD0, 28.53%)                       | <i>Candidatus Nitrosoglobus terrae</i><br>(A0A1Q2SND8, 56.38%) |

**Table S8.** Transcriptomics analysis of “Ca. N. tergens RJ19” grown on NH<sub>3</sub> and urea. Values are expressed as RPKM and they represent the average over three samples. Sd: standard deviation.

| Locus_tag  | Gene | Product                                                                   | NH <sub>3</sub> | Urea     | sd NH <sub>3</sub> | sd urea | log2 Fold change | Pvalue | Padj |
|------------|------|---------------------------------------------------------------------------|-----------------|----------|--------------------|---------|------------------|--------|------|
| NSCAC_1280 | amoC | Ammonia monooxygenase subunit C                                           | 333276.3        | 281512.7 | 44135.7            | 46894.8 | -1               | 0.02   | 0.09 |
| NSCAC_1538 |      | conserved exported protein of unknown function                            | 50564.3         | 74270    | 8392.4             | 25928.9 | 0                | 0.74   | 0.86 |
| NSCAC_1278 | amoA | Ammonia monooxygenase subunit A                                           | 39278.4         | 19830.5  | 2666.3             | 806     | -1               | 0      | 0    |
| NSCAC_1277 | amoB | Ammonia monooxygenase subunit B                                           | 38123.4         | 18143.5  | 3609.9             | 2050.1  | -2               | 0      | 0    |
| NSCAC_0496 |      | conserved protein of unknown function                                     | 19015.8         | 15737.9  | 4288.9             | 3558.8  | -1               | 0.02   | 0.09 |
| NSCAC_0045 |      | conserved exported protein of unknown function                            | 15642.7         | 11313    | 7510.3             | 8227.9  | -1               | 0.04   | 0.12 |
| NSCAC_0627 |      | protein of unknown function                                               | 12418.1         | 22022.9  | 4244.4             | 10397   | 0                | 0.24   | 0.46 |
| NSCAC_1718 | ctaE | Cytochrome c oxidase, subunit III                                         | 12007.9         | 7907.3   | 1002.2             | 1888.8  | -1               | 0      | 0    |
| NSCAC_0046 |      | exported protein of unknown function                                      | 9312.6          | 8376.1   | 5424.3             | 5974.5  | -1               | 0.19   | 0.41 |
| NSCAC_0107 |      | Cytochrome c class I                                                      | 7732            | 8052.2   | 1664.2             | 2508    | 0                | 0.27   | 0.5  |
| NSCAC_1721 | ctaD | Cytochrome c oxidase, subunit I                                           | 7570.8          | 3279.1   | 459.9              | 67.4    | -2               | 0      | 0    |
| NSCAC_0629 |      | Chain A, Red Copper Protein Nitrosocyanin                                 | 6783.8          | 4283.8   | 2445.5             | 1834.3  | -1               | 0      | 0    |
| NSCAC_1037 |      | conserved protein of unknown function, putative ammonia/ammonium permease | 6628.9          | 52550.8  | 251.1              | 17114.9 | 3                | 0      | 0    |
| NSCAC_0173 |      | putative cold shock protein (CspA-like)                                   | 6418.2          | 8391.2   | 1319.4             | 1809.7  | 0                | 0.84   | 0.92 |
| NSCAC_0754 |      | conserved membrane protein of unknown function                            | 6022.3          | 6026.7   | 875                | 291.2   | 0                | 0.04   | 0.13 |
| NSCAC_0844 |      | exported protein of unknown function                                      | 5988            | 3000.9   | 724.3              | 78.8    | -1               | 0      | 0    |
| NSCAC_1722 | ctaC | Cytochrome c oxidase subunit II                                           | 5979            | 2662.4   | 976.7              | 316.6   | -2               | 0      | 0    |
| NSCAC_0034 |      | conserved exported protein of unknown function                            | 5741.8          | 4890.4   | 2162.7             | 3781.5  | -1               | 0.11   | 0.27 |
| NSCAC_0116 |      | conserved exported protein of unknown function                            | 5647.6          | 4271.9   | 1028.3             | 177.1   | -1               | 0      | 0    |

|            |       |                                                                                        |        |        |        |        |    |      |      |
|------------|-------|----------------------------------------------------------------------------------------|--------|--------|--------|--------|----|------|------|
| NSCAC_1276 |       | conserved exported protein of unknown function                                         | 5282.3 | 4021   | 428.9  | 111.5  | -1 | 0    | 0    |
| NSCAC_0816 |       | putative peroxiredoxin                                                                 | 5263.1 | 3887.4 | 213.5  | 227    | -1 | 0    | 0    |
| NSCAC_1539 | smbP  | Metal-binding protein SmbP                                                             | 4687   | 9323.1 | 219.1  | 2518.9 | 1  | 0.05 | 0.16 |
| NSCAC_0370 | rpsE  | 30S ribosomal protein S5                                                               | 4583.6 | 2544.7 | 1564   | 706.1  | -1 | 0    | 0    |
| NSCAC_0137 | coxA  | Cytochrome c oxidase, subunit I                                                        | 4553.9 | 1306   | 166.1  | 51.6   | -2 | 0    | 0    |
| NSCAC_1125 | cycX  | putative tetraheme cytochrome c                                                        | 4369.5 | 3267.7 | 665.1  | 792.5  | -1 | 0    | 0    |
| NSCAC_0136 | coxB  | Cytochrome c oxidase, subunit II                                                       | 3954.1 | 1216.2 | 671.5  | 263.8  | -2 | 0    | 0    |
| NSCAC_0972 |       | conserved exported protein of unknown function                                         | 3502.1 | 7215.4 | 211.2  | 74.6   | 1  | 0    | 0    |
| NSCAC_0345 | rplL  | 50S ribosomal subunit protein L7/L12                                                   | 3397.4 | 3928.5 | 746.4  | 1070.9 | 0  | 0.24 | 0.47 |
| NSCAC_1662 | rbpD  | putative RNA-binding protein RbpD                                                      | 3233   | 3915.1 | 1021.8 | 1450.7 | 0  | 0.53 | 0.73 |
| NSCAC_0032 | groEL | chaperone Hsp60, peptide-dependent ATPase, heat shock protein                          | 3187.2 | 3771.4 | 74.7   | 207.8  | 0  | 0.17 | 0.38 |
| NSCAC_1719 | ctaG  | Cytochrome c oxidase assembly protein CtaG                                             | 3020.6 | 1040.4 | 274.1  | 261.4  | -2 | 0    | 0    |
| NSCAC_1127 | hao   | Hydroxylamine oxidoreductase                                                           | 3015.8 | 2291.5 | 453.8  | 497.3  | -1 | 0    | 0    |
| NSCAC_0588 | cbbS  | Ribulose biphosphate carboxylase small chain                                           | 2972.9 | 841.4  | 533.7  | 91.2   | -2 | 0    | 0    |
| NSCAC_0118 |       | conserved exported protein of unknown function                                         | 2906.6 | 1495.5 | 345.7  | 192.7  | -1 | 0    | 0    |
| NSCAC_0497 |       | conserved exported protein of unknown function                                         | 2403.6 | 2538.1 | 624.1  | 189.1  | 0  | 0.07 | 0.21 |
| NSCAC_0587 | cbbL  | Ribulose biphosphate carboxylase large chain                                           | 2380.9 | 611.8  | 105.6  | 19.3   | -2 | 0    | 0    |
| NSCAC_0592 |       | Glutathione S-transferase, N-terminal domain                                           | 2231.6 | 1246.5 | 257.9  | 110.8  | -1 | 0    | 0    |
| NSCAC_0368 | rplF  | 50S ribosomal subunit protein L6                                                       | 2200.8 | 2511.5 | 76.3   | 423.5  | 0  | 0.08 | 0.23 |
| NSCAC_0187 |       | protein of unknown function                                                            | 2107.2 | 1244.8 | 580.2  | 179.7  | -1 | 0    | 0    |
| NSCAC_1564 |       | Formate/nitrite transporter                                                            | 2003   | 5000.1 | 226.8  | 314.9  | 1  | 0    | 0    |
| NSCAC_0893 |       | exported protein of unknown function                                                   | 1963.4 | 1448.9 | 298.6  | 107.2  | -1 | 0    | 0    |
| NSCAC_1725 |       | Cytochrome c, class I                                                                  | 1883.2 | 1031.1 | 418.2  | 331.3  | -1 | 0    | 0    |
| NSCAC_0278 | trxA  | thioredoxin I                                                                          | 1882.2 | 1929.4 | 164    | 586.4  | 0  | 0.17 | 0.38 |
| NSCAC_0895 |       | exported protein of unknown function                                                   | 1801.5 | 1940.8 | 253.7  | 138.8  | 0  | 0.01 | 0.06 |
| NSCAC_0351 | tufB  | protein chain elongation factor EF-Tu, possible GTP-binding factor (duplicate of tufA) | 1623   | 2538.3 | 589.6  | 51.2   | 0  | 0.23 | 0.46 |
| NSCAC_1635 |       | conserved exported protein of unknown function                                         | 1555.1 | 1246.2 | 179.5  | 20.1   | -1 | 0    | 0    |
| NSCAC_0894 |       | protein of unknown function                                                            | 1520.9 | 1337.4 | 229.4  | 69.4   | -1 | 0    | 0    |
| NSCAC_0970 | folE  | GTP cyclohydrolase I                                                                   | 1517   | 767.6  | 54.6   | 50.8   | -1 | 0    | 0    |
| NSCAC_1723 |       | conserved protein of unknown function                                                  | 1507.8 | 449.3  | 134.9  | 164.4  | -2 | 0    | 0    |

|            |      |                                                                                        |        |        |       |        |    |      |      |
|------------|------|----------------------------------------------------------------------------------------|--------|--------|-------|--------|----|------|------|
| NSCAC_0469 |      | Sigma-54 factor interaction domain-containing protein                                  | 1493.1 | 1647.2 | 213   | 305.2  | 0  | 0.24 | 0.47 |
| NSCAC_0039 |      | exported protein of unknown function                                                   | 1482.3 | 4404.9 | 303.7 | 1861.6 | 1  | 0    | 0    |
| NSCAC_1129 |      | Putative Cytochrome P460                                                               | 1469.4 | 957.9  | 284.2 | 177.6  | -1 | 0    | 0    |
| NSCAC_0230 | ftsH | protease, ATP-dependent zinc-metallo                                                   | 1462.1 | 1403   | 253.5 | 180.4  | 0  | 0    | 0    |
| NSCAC_0688 |      | exported protein of unknown function                                                   | 1448.5 | 2957   | 110.6 | 288.1  | 1  | 0    | 0    |
| NSCAC_1028 |      | Aminoglycoside phosphotransferase (modular protein)                                    | 1423.1 | 1082.1 | 370.3 | 482.2  | -1 | 0.04 | 0.12 |
| NSCAC_0590 |      | conserved protein of unknown function                                                  | 1374.1 | 1398.9 | 180.2 | 189.1  | 0  | 0.04 | 0.13 |
| NSCAC_0767 |      | conserved membrane protein of unknown function                                         | 1360.4 | 1413.2 | 56    | 100.5  | 0  | 0.03 | 0.11 |
| NSCAC_1368 |      | conserved exported protein of unknown function                                         | 1331.2 | 1709.4 | 79.7  | 134.6  | 0  | 0.67 | 0.82 |
| NSCAC_1496 | rpmG | 50S ribosomal protein L33                                                              | 1320   | 1552.7 | 327   | 98.3   | 0  | 0.33 | 0.56 |
| NSCAC_0888 |      | conserved protein of unknown function                                                  | 1290.2 | 1003.8 | 224.7 | 159.2  | -1 | 0    | 0    |
| NSCAC_1387 |      | conserved protein of unknown function                                                  | 1286.6 | 896    | 96.8  | 168.2  | -1 | 0    | 0    |
| NSCAC_0089 | petC | Quinol-cytochrome c reductase, cytochrome c1 subunit                                   | 1266.9 | 1221.1 | 293.6 | 220.9  | 0  | 0    | 0.01 |
| NSCAC_1126 |      | conserved protein of unknown function, putative HaoB                                   | 1257.9 | 745.8  | 122.8 | 303.9  | -1 | 0    | 0    |
| NSCAC_1574 | yrbE | toluene transporter subunit: membrane component of ABC superfamily                     | 1248.5 | 1406.3 | 84.6  | 178.3  | 0  | 0.2  | 0.42 |
| NSCAC_1306 | sodB | superoxide dismutase, Fe                                                               | 1228.6 | 833.3  | 352.5 | 286.6  | -1 | 0    | 0    |
| NSCAC_0373 | secY | preprotein translocase membrane subunit                                                | 1159.2 | 1297.3 | 74.7  | 20.5   | 0  | 0.04 | 0.14 |
| NSCAC_1565 |      | conserved protein of unknown function                                                  | 1139.2 | 703.7  | 208.6 | 160.4  | -1 | 0    | 0    |
| NSCAC_1724 |      | Cytochrome c, class I                                                                  | 1133.4 | 425.3  | 94.2  | 107.4  | -2 | 0    | 0    |
| NSCAC_0115 |      | conserved protein of unknown function                                                  | 1132.7 | 1489.4 | 347.4 | 119.9  | 0  | 0.88 | 0.94 |
| NSCAC_0369 | rplR | 50S ribosomal subunit protein L18                                                      | 1100.7 | 680.9  | 306.1 | 436.7  | -1 | 0    | 0    |
| NSCAC_0339 | tufB | protein chain elongation factor EF-Tu, possible GTP-binding factor (duplicate of tufA) | 1078.6 | 1582.1 | 13.8  | 156.5  | 0  | 0.53 | 0.73 |
| NSCAC_1713 | ctaB | Protoheme IX farnesyltransferase                                                       | 1075.4 | 443.9  | 247.8 | 42.3   | -2 | 0    | 0    |
| NSCAC_1149 |      | Blue (Type1) copper domain-containing protein                                          | 1074.7 | 1221.1 | 316.1 | 348.1  | 0  | 0.22 | 0.44 |
| NSCAC_0980 | tal  | Transaldolase                                                                          | 1061   | 729.6  | 395.9 | 273.2  | -1 | 0    | 0    |
| NSCAC_1100 | csrA | pleiotropic regulatory protein for carbon source metabolism                            | 1054.5 | 1246.4 | 187.6 | 165.2  | 0  | 0.36 | 0.6  |
| NSCAC_0044 |      | exported protein of unknown function                                                   | 1048.4 | 2176.3 | 580.5 | 1636.8 | 1  | 0.36 | 0.59 |
| NSCAC_0295 |      | Ste24 endopeptidase                                                                    | 1028.3 | 595.9  | 54.9  | 32.5   | -1 | 0    | 0    |
| NSCAC_0783 | coaX | Type III pantothenate kinase                                                           | 1012.4 | 1062   | 230.7 | 58.7   | 0  | 0.05 | 0.15 |
| NSCAC_0372 | rplO | 50S ribosomal subunit protein L15                                                      | 970.9  | 892.1  | 187.7 | 217.7  | -1 | 0    | 0.01 |

|            |      |                                                           |       |        |       |       |    |      |      |
|------------|------|-----------------------------------------------------------|-------|--------|-------|-------|----|------|------|
| NSCAC_0141 | hupA | HU, DNA-binding transcriptional regulator, alpha subunit  | 965.5 | 553.9  | 374.8 | 366.6 | -1 | 0    | 0    |
| NSCAC_1563 | norB | Nitric oxide reductase                                    | 955.4 | 525.3  | 95.3  | 36.3  | -1 | 0    | 0    |
| NSCAC_0914 | acpP | acyl carrier protein (ACP)                                | 948.5 | 1456.9 | 66    | 31.3  | 0  | 0.32 | 0.55 |
| NSCAC_0257 |      | conserved protein of unknown function                     | 943.5 | 990.8  | 123.9 | 21    | 0  | 0.05 | 0.17 |
| NSCAC_0259 |      | protein of unknown function                               | 929.9 | 1332.3 | 246.8 | 75    | 0  | 0.53 | 0.73 |
| NSCAC_0360 | rplP | 50S ribosomal protein L16                                 | 913.4 | 1289.7 | 296.7 | 512.3 | 0  | 0.81 | 0.9  |
| NSCAC_0348 | rpsL | 30S ribosomal protein S12                                 | 904.4 | 1112.5 | 346.1 | 292.5 | 0  | 0.62 | 0.79 |
| NSCAC_1157 |      | protein of unknown function                               | 896.7 | 187.9  | 213   | 21.3  | -3 | 0    | 0    |
| NSCAC_0091 | petA | Quinol-cytochrome c reductase, iron-sulfur subunit        | 894.5 | 912.1  | 48.9  | 97.3  | 0  | 0.01 | 0.04 |
| NSCAC_0367 | rpsH | 30S ribosomal subunit protein S8                          | 891   | 1212.7 | 471.4 | 371.7 | 0  | 0.89 | 0.95 |
| NSCAC_1768 | atpD | F1 sector of membrane-bound ATP synthase, beta subunit    | 889.7 | 977.7  | 120   | 162.1 | 0  | 0.02 | 0.09 |
| NSCAC_0440 | tehB | putative AdoMet-dependent methyltransferase               | 888.7 | 894.3  | 98.3  | 206.1 | 0  | 0.1  | 0.26 |
| NSCAC_0246 | nuoL | NADH ubiquinone oxidoreductase subunit L                  | 863.5 | 834.2  | 40.6  | 113.7 | 0  | 0.02 | 0.08 |
| NSCAC_1627 | hflC | Protein HflC                                              | 853.2 | 683.9  | 77.5  | 25.2  | -1 | 0    | 0    |
| NSCAC_0551 |      | conserved protein of unknown function                     | 844.4 | 509.9  | 412.5 | 209.7 | -1 | 0    | 0    |
| NSCAC_0904 |      | conserved membrane protein of unknown function            | 834.7 | 729.5  | 47.2  | 197.1 | -1 | 0.02 | 0.08 |
| NSCAC_1672 |      | Peptidoglycan-associated lipoprotein                      | 827.8 | 940.2  | 361.2 | 232   | 0  | 0.37 | 0.6  |
| NSCAC_1751 | minE | cell division topological specificity factor              | 826.1 | 877.4  | 202.7 | 57.3  | 0  | 0.03 | 0.1  |
| NSCAC_0350 | fusA | protein chain elongation factor EF-G, GTP-binding         | 825.7 | 1325.5 | 120.7 | 122.1 | 0  | 0.04 | 0.13 |
| NSCAC_0903 |      | conserved membrane protein of unknown function            | 820.6 | 625    | 150.1 | 122.6 | -1 | 0    | 0.01 |
| NSCAC_0247 | nuoM | NADH ubiquinone oxidoreductase subunit M                  | 818.7 | 768.2  | 117.2 | 99.2  | -1 | 0.02 | 0.09 |
| NSCAC_0460 |      | Heat shock protein Hsp20                                  | 809.2 | 1771.7 | 78.8  | 119.8 | 1  | 0    | 0    |
| NSCAC_1767 | atpC | F1 sector of membrane-bound ATP synthase, epsilon subunit | 801.4 | 754.7  | 160.7 | 84.5  | -1 | 0.01 | 0.03 |
| NSCAC_1497 |      | Fatty acid desaturase                                     | 799.2 | 559.1  | 132.3 | 77    | -1 | 0    | 0    |
| NSCAC_1156 |      | Lipoprotein (fragment)                                    | 797   | 149.6  | 147.7 | 20.3  | -3 | 0    | 0    |
| NSCAC_0447 |      | conserved protein of unknown function                     | 791.6 | 593.2  | 127.4 | 159.3 | -1 | 0    | 0    |
| NSCAC_1720 |      | protein of unknown function                               | 790.9 | 270.4  | 344   | 34.5  | -2 | 0    | 0    |
| NSCAC_0356 | rplB | 50S ribosomal protein L2                                  | 785.7 | 1287.8 | 151.2 | 97.3  | 0  | 0.03 | 0.1  |
| NSCAC_1391 |      | Thiol:disulfide interchange protein                       | 779.3 | 880.8  | 130.3 | 15.3  | 0  | 0.07 | 0.2  |
| NSCAC_0933 | pgsA | phosphatidylglycerophosphate synthetase                   | 767.1 | 654.5  | 136.3 | 115.7 | -1 | 0    | 0.02 |
| NSCAC_1495 | rpmB | 50S ribosomal protein L28                                 | 752.9 | 713.6  | 466.7 | 384   | 0  | 0.24 | 0.46 |



|            |      |                                                                     |       |        |       |       |    |      |      |
|------------|------|---------------------------------------------------------------------|-------|--------|-------|-------|----|------|------|
| NSCAC_1727 | hisH | Imidazole glycerol phosphate synthase subunit HisH                  | 749.4 | 778.6  | 119.2 | 255   | 0  | 0.23 | 0.46 |
| NSCAC_0213 | fba  | Fructose-bisphosphate aldolase                                      | 742.4 | 776.3  | 105   | 117.5 | 0  | 0    | 0.01 |
| NSCAC_0766 |      | membrane protein of unknown function                                | 730.5 | 684.5  | 118   | 67.4  | -1 | 0.01 | 0.06 |
| NSCAC_0359 | rpsC | 30S ribosomal protein S3                                            | 723.8 | 985.3  | 250.3 | 329.7 | 0  | 0.98 | 0.99 |
| NSCAC_0083 | pntB | pyridine nucleotide transhydrogenase, beta subunit                  | 711.8 | 485.1  | 12.8  | 70    | -1 | 0    | 0    |
| NSCAC_1220 | ccpA | Cytochrome c551 peroxidase                                          | 710.3 | 1585.7 | 136.6 | 495.1 | 1  | 0    | 0    |
| NSCAC_1770 | atpA | F1 sector of membrane-bound ATP synthase, alpha subunit             | 702.4 | 855.2  | 30.1  | 42.1  | 0  | 0.31 | 0.54 |
| NSCAC_1773 | atpE | F0 sector of membrane-bound ATP synthase, subunit c                 | 702.1 | 822.6  | 157.4 | 233.5 | 0  | 0.49 | 0.71 |
| NSCAC_0378 | rplQ | 50S ribosomal protein L17                                           | 697.7 | 945.8  | 111   | 45.6  | 0  | 0.93 | 0.97 |
| NSCAC_0938 | can2 | Carbonic anhydrase 2                                                | 694.2 | 509.3  | 123   | 99.7  | -1 | 0    | 0    |
| NSCAC_0785 |      | Sulfurtransferase                                                   | 691.4 | 614.4  | 208.3 | 90.6  | -1 | 0    | 0.01 |
| NSCAC_1772 | atpF | F0 sector of membrane-bound ATP synthase, subunit b                 | 688.1 | 971.3  | 131   | 258   | 0  | 0.76 | 0.87 |
| NSCAC_1212 | ccmE | periplasmic heme chaperone                                          | 682.1 | 678.8  | 197.7 | 27    | 0  | 0.02 | 0.08 |
| NSCAC_0344 | rplJ | 50S ribosomal subunit protein L10                                   | 676.3 | 907.6  | 157.6 | 146.2 | 0  | 0.92 | 0.97 |
| NSCAC_0363 | rplN | 50S ribosomal protein L14                                           | 670.6 | 909.8  | 164.9 | 190.9 | 0  | 0.95 | 0.98 |
| NSCAC_1267 | rpe  | D-ribulose-5-phosphate 3-epimerase                                  | 660.7 | 579.8  | 142.7 | 57.7  | -1 | 0    | 0    |
| NSCAC_1507 |      | tRNA (5-methylaminomethyl-2-thiouridylate)-methyltransferase        | 659.1 | 1006.5 | 26.1  | 291   | 0  | 0.47 | 0.68 |
| NSCAC_1626 | hfIK | modulator for HflB protease specific for phage lambda cII repressor | 651.2 | 582.1  | 133.2 | 197.7 | -1 | 0    | 0.02 |
| NSCAC_1177 | zwf  | Glucose-6-phosphate 1-dehydrogenase                                 | 650.9 | 406.1  | 79.6  | 23.7  | -1 | 0    | 0    |
| NSCAC_1176 | gnd  | 6-phosphogluconate dehydrogenase, decarboxylating                   | 648.3 | 418.4  | 102.7 | 38.8  | -1 | 0    | 0    |
| NSCAC_0298 | trxB | thioredoxin reductase 1                                             | 640.4 | 522.5  | 77.1  | 57.9  | -1 | 0    | 0.01 |
| NSCAC_0364 | rplX | 50S ribosomal subunit protein L24                                   | 636.3 | 1113   | 193.8 | 410.3 | 0  | 0.14 | 0.33 |
| NSCAC_0992 |      | Amidohydrolase                                                      | 611.8 | 574.5  | 155.4 | 25.8  | -1 | 0    | 0.02 |
| NSCAC_0028 | rpoD | RNA polymerase, sigma 70 (sigma D) factor                           | 607.2 | 606.5  | 58.4  | 37.5  | 0  | 0    | 0.01 |
| NSCAC_0090 | petB | Quinol-cytochrome c reductase, cytochrome b subunit                 | 607.2 | 620.2  | 17.9  | 57.1  | 0  | 0    | 0.02 |
| NSCAC_0724 | terE | Tellurium resistance protein TerE                                   | 601.9 | 439.1  | 231.6 | 230.8 | -1 | 0    | 0.02 |
| NSCAC_0829 |      | conserved protein of unknown function                               | 600.2 | 1783.8 | 208.2 | 394.4 | 1  | 0    | 0    |
| NSCAC_1657 |      | conserved exported protein of unknown function                      | 599.9 | 389.1  | 179.1 | 74.8  | -1 | 0    | 0    |
| NSCAC_0543 | aceE | Pyruvate dehydrogenase, decarboxylase component E1                  | 593   | 471.3  | 79.3  | 46.1  | -1 | 0    | 0    |
| NSCAC_0240 | nuoF | NADH-quinone oxidoreductase, F subunit                              | 579.6 | 728.4  | 105.4 | 21.5  | 0  | 0.53 | 0.73 |
| NSCAC_0705 |      | DegP2 peptidase, Serine peptidase, MEROPS family S01B               | 578.3 | 221.9  | 74.4  | 10    | -2 | 0    | 0    |

|            |      |                                                                                                                                  |       |        |       |       |    |      |      |
|------------|------|----------------------------------------------------------------------------------------------------------------------------------|-------|--------|-------|-------|----|------|------|
| NSCAC_0238 | nuoD | NADH-quinone oxidoreductase subunit D                                                                                            | 572.4 | 721.5  | 54.9  | 69.5  | 0  | 0.59 | 0.77 |
| NSCAC_1499 |      | ABC transporter related protein                                                                                                  | 571.3 | 724.5  | 133.5 | 29.3  | 0  | 0.66 | 0.81 |
| NSCAC_1765 | glmS | L-glutamine:D-fructose-6-phosphate aminotransferase                                                                              | 566.1 | 415.2  | 29.7  | 23.1  | -1 | 0    | 0    |
| NSCAC_0343 | rplA | 50S ribosomal subunit protein L1                                                                                                 | 565.8 | 663.7  | 180.4 | 212.9 | 0  | 0.36 | 0.6  |
| NSCAC_0353 | rplC | 50S ribosomal subunit protein L3                                                                                                 | 556.2 | 740.3  | 98.5  | 166.8 | 0  | 0.86 | 0.93 |
| NSCAC_0264 |      | conserved exported protein of unknown function                                                                                   | 555.4 | 567.7  | 160.1 | 110.2 | 0  | 0.03 | 0.11 |
| NSCAC_1118 | glgC | glucose-1-phosphate adenyltransferase                                                                                            | 555   | 625.5  | 61.6  | 31.6  | 0  | 0.07 | 0.2  |
| NSCAC_0210 | gap  | Glyceraldehyde-3-phosphate dehydrogenase                                                                                         | 553.8 | 625    | 98.5  | 32.8  | 0  | 0.06 | 0.18 |
| NSCAC_0950 |      | conserved protein of unknown function                                                                                            | 546.3 | 1027.6 | 79.4  | 186   | 0  | 0.02 | 0.07 |
| NSCAC_1702 |      | FAD-dependent pyridine nucleotide-disulfide oxidoreductase                                                                       | 546.3 | 382.1  | 92.9  | 20.9  | -1 | 0    | 0    |
| NSCAC_0293 |      | Rhodanese-related sulfurtransferase                                                                                              | 541.7 | 471.3  | 117.4 | 46.4  | -1 | 0    | 0    |
| NSCAC_1711 | rpsT | 30S ribosomal subunit protein S20                                                                                                | 541.6 | 288.6  | 103.3 | 99.7  | -1 | 0    | 0    |
| NSCAC_0546 |      | conserved membrane protein of unknown function                                                                                   | 533.3 | 741.9  | 130.2 | 67.2  | 0  | 0.76 | 0.87 |
| NSCAC_0886 | rpsA | 30S ribosomal subunit protein S1                                                                                                 | 533.1 | 702.6  | 108.5 | 308.4 | 0  | 0.82 | 0.9  |
| NSCAC_1148 |      | Amidohydrolase 2                                                                                                                 | 529   | 858.6  | 96.8  | 184.2 | 0  | 0.09 | 0.25 |
| NSCAC_1390 | cycA | Cytochrome c class I                                                                                                             | 526.2 | 934.9  | 210.2 | 189.1 | 0  | 0.06 | 0.18 |
| NSCAC_0905 | terD | tellurium resistance protein                                                                                                     | 526.2 | 778.8  | 273.9 | 212.6 | 0  | 0.58 | 0.76 |
| NSCAC_0248 | nuoN | NADH ubiquinone oxidoreductase subunit N                                                                                         | 522.9 | 609.1  | 60.1  | 124   | 0  | 0.35 | 0.58 |
| NSCAC_0866 |      | TonB-dependent heme/hemoglobin receptor family protein/TonB-dependent hemoglobin/transferrin/lactoferrin receptor family protein | 520.7 | 338.5  | 40.3  | 75.4  | -1 | 0    | 0    |
| NSCAC_0376 | rpsD | 30S ribosomal protein S4                                                                                                         | 518.2 | 953.1  | 92.1  | 390   | 0  | 0.06 | 0.18 |
| NSCAC_0365 | rplE | 50S ribosomal protein L5                                                                                                         | 513.1 | 644.1  | 121.2 | 230.1 | 0  | 0.58 | 0.76 |
| NSCAC_0669 | ispH | 1-hydroxy-2-methyl-2-(E)-butenyl 4-diphosphate reductase, 4Fe-4S protein                                                         | 510.6 | 555.5  | 109   | 117.8 | 0  | 0.05 | 0.16 |
| NSCAC_0971 | yahK | putative oxidoreductase, Zn-dependent and NAD(P)-binding                                                                         | 510.6 | 605.9  | 112   | 19    | 0  | 0.34 | 0.58 |
| NSCAC_0541 | gdh  | Glutamate dehydrogenase                                                                                                          | 507.5 | 646    | 58.1  | 52.1  | 0  | 0.64 | 0.8  |
| NSCAC_0498 |      | conserved protein of unknown function                                                                                            | 502.7 | 371.4  | 67.8  | 52.5  | -1 | 0    | 0    |
| NSCAC_1456 | rpoZ | DNA-directed RNA polymerase subunit omega                                                                                        | 500.5 | 833.9  | 95.2  | 144.4 | 0  | 0.04 | 0.12 |
| NSCAC_0352 | rpsJ | 30S ribosomal protein S10                                                                                                        | 500.3 | 502.1  | 135.7 | 93.4  | 0  | 0.03 | 0.12 |
| NSCAC_1256 | ihfB | Integration host factor subunit beta                                                                                             | 497.6 | 220.8  | 295.5 | 158.2 | -2 | 0.01 | 0.05 |
| NSCAC_1285 |      | CDP-diacylglycerol/serine O-phosphatidyltransferase                                                                              | 496.3 | 599.5  | 96.7  | 108.5 | 0  | 0.5  | 0.71 |
| NSCAC_1161 | fdhA | Glutathione-independent formaldehyde dehydrogenase                                                                               | 492.2 | 627.9  | 109.4 | 40.9  | 0  | 0.65 | 0.8  |

|            |       |                                                                                                                                     |       |        |       |       |    |      |      |
|------------|-------|-------------------------------------------------------------------------------------------------------------------------------------|-------|--------|-------|-------|----|------|------|
| NSCAC_0236 | nuoB  | NADH-quinone oxidoreductase subunit B 2                                                                                             | 491.7 | 522.3  | 86.9  | 53    | 0  | 0.09 | 0.24 |
| NSCAC_0175 | rplM  | 50S ribosomal protein L13                                                                                                           | 490.5 | 812.6  | 188.5 | 167.2 | 0  | 0.16 | 0.37 |
| NSCAC_1288 | ilvI  | Acetolactate synthase, large subunit                                                                                                | 488.3 | 490.5  | 70    | 27.5  | 0  | 0    | 0    |
| NSCAC_0241 | nuoG  | NADH-quinone oxidoreductase, chain G                                                                                                | 488   | 509.2  | 19.3  | 54.7  | 0  | 0.01 | 0.03 |
| NSCAC_0037 |       | protein of unknown function                                                                                                         | 486.8 | 1606.6 | 140.1 | 734.9 | 1  | 0    | 0    |
| NSCAC_0229 | rrmJ  | 23S rRNA methyltransferase                                                                                                          | 486.1 | 1054.5 | 154.9 | 55.3  | 1  | 0    | 0    |
| NSCAC_0926 | clpP  | ATP-dependent Clp protease proteolytic subunit (Endopeptidase Clp) (Caseinolytic protease) (Protease Ti) (Heat shock protein F21.5) | 482   | 548.7  | 154   | 118.8 | 0  | 0.25 | 0.47 |
| NSCAC_0244 | nuoJ  | NADH-ubiquinone/plastoquinone oxidoreductase chain J                                                                                | 482   | 601.6  | 61.8  | 26.6  | 0  | 0.53 | 0.73 |
| NSCAC_0941 | glk   | Glucokinase                                                                                                                         | 481.5 | 281.9  | 16.9  | 41.7  | -1 | 0    | 0    |
| NSCAC_1573 | yrbD  | toluene transporter subunit: membrane component of ABC superfamily                                                                  | 480.8 | 585.9  | 120.4 | 249.4 | 0  | 0.52 | 0.72 |
| NSCAC_1728 | hisA  | Phosphoribosylformimino-5-aminoimidazole carboxamide ribotide isomerase                                                             | 480   | 473.9  | 79.4  | 59.1  | 0  | 0.02 | 0.08 |
| NSCAC_1327 |       | O-antigen polymerase                                                                                                                | 478.5 | 287.7  | 61.9  | 2.6   | -1 | 0    | 0    |
| NSCAC_1210 | ccmC  | heme exporter subunit ; membrane component of ABC superfamily                                                                       | 473.3 | 432.5  | 133.3 | 50.7  | -1 | 0.03 | 0.11 |
| NSCAC_0586 |       | conserved protein of unknown function                                                                                               | 472.8 | 436.1  | 132   | 83.4  | -1 | 0    | 0.01 |
| NSCAC_1169 |       | putative Multidrug resistance protein B                                                                                             | 472.8 | 718    | 59.2  | 135.2 | 0  | 0.54 | 0.73 |
| NSCAC_0564 |       | conserved exported protein of unknown function                                                                                      | 468.7 | 258.8  | 84.3  | 26.7  | -1 | 0    | 0    |
| NSCAC_0355 | rplW  | 50S ribosomal subunit protein L23                                                                                                   | 468.6 | 820.6  | 154.9 | 403.5 | 0  | 0.23 | 0.46 |
| NSCAC_0377 | rpoA  | RNA polymerase, alpha subunit                                                                                                       | 467.9 | 620.2  | 149   | 306   | 0  | 0.9  | 0.95 |
| NSCAC_0242 | nuoH  | NADH:ubiquinone oxidoreductase, membrane subunit H                                                                                  | 464.9 | 436.4  | 23.8  | 37.4  | -1 | 0.01 | 0.04 |
| NSCAC_0172 |       | putative RNA-binding protein                                                                                                        | 464.7 | 848.7  | 121   | 89.1  | 0  | 0.02 | 0.07 |
| NSCAC_1624 |       | RNA-binding protein Hfq (modular protein)                                                                                           | 463.6 | 369.5  | 89.9  | 76.1  | -1 | 0    | 0    |
| NSCAC_0031 | groES | chaperone Hsp10, affects cell division                                                                                              | 461.8 | 603.7  | 88.5  | 125.9 | 0  | 0.74 | 0.86 |
| NSCAC_0668 |       | Hopanoid biosynthesis associated radical SAM protein HpnH                                                                           | 460.3 | 577.1  | 58.5  | 94.5  | 0  | 0.43 | 0.66 |
| NSCAC_1576 |       | VacJ family lipoprotein                                                                                                             | 460.2 | 389.5  | 69    | 40.8  | -1 | 0    | 0    |
| NSCAC_0628 |       | protein of unknown function                                                                                                         | 459.6 | 391.2  | 100.9 | 214.2 | -1 | 0.02 | 0.08 |
| NSCAC_0579 | pnp   | polynucleotide phosphorylase/polyadenylase                                                                                          | 456.3 | 454.8  | 103.1 | 63.1  | 0  | 0    | 0.02 |
| NSCAC_0174 | rpsI  | 30S ribosomal protein S9                                                                                                            | 455.9 | 401.7  | 144.5 | 60    | -1 | 0    | 0.01 |
| NSCAC_0915 | fabG  | 3-oxoacyl-[acyl-carrier-protein] reductase                                                                                          | 454.9 | 415.6  | 99.5  | 69.3  | -1 | 0    | 0    |
| NSCAC_1769 | atpG  | F1 sector of membrane-bound ATP synthase, gamma subunit                                                                             | 453.2 | 641.2  | 89.7  | 145.6 | 0  | 0.71 | 0.84 |
| NSCAC_1500 |       | putative ABC transporter, permease protein                                                                                          | 452.8 | 590.7  | 92.7  | 32.7  | 0  | 0.81 | 0.9  |

|            |       |                                                                                                     |       |        |       |        |    |      |      |
|------------|-------|-----------------------------------------------------------------------------------------------------|-------|--------|-------|--------|----|------|------|
| NSCAC_1286 | ilvC  | Ketol-acid reductoisomerase                                                                         | 444.8 | 486.3  | 32.8  | 47.5   | 0  | 0.03 | 0.1  |
| NSCAC_1305 |       | putative glutaredoxin-like protein (grxD-like)                                                      | 444.3 | 662.3  | 106.9 | 62.7   | 0  | 0.7  | 0.83 |
| NSCAC_1757 | gevT  | aminomethyltransferase, tetrahydrofolate-dependent, subunit (T protein) of glycine cleavage complex | 443.5 | 432.7  | 40.3  | 53.4   | 0  | 0.03 | 0.1  |
| NSCAC_1755 | hemC  | hydroxymethylbilane synthase                                                                        | 440.4 | 516.7  | 37.1  | 14.2   | 0  | 0.13 | 0.32 |
| NSCAC_0349 | rpsG  | 30S ribosomal protein S7                                                                            | 439.6 | 839.6  | 71.7  | 215.2  | 0  | 0.01 | 0.04 |
| NSCAC_1655 | hemL  | Glutamate-1-semialdehyde aminotransferase                                                           | 437.4 | 382.9  | 98.1  | 29.2   | -1 | 0    | 0    |
| NSCAC_0357 | rpsS  | 30S ribosomal protein S19                                                                           | 436.9 | 700.9  | 99    | 105.5  | 0  | 0.17 | 0.39 |
| NSCAC_1530 | metF  | 5,10-methylenetetrahydrofolate reductase                                                            | 434.3 | 326.8  | 18.2  | 22.3   | -1 | 0    | 0    |
| NSCAC_0670 | dxs   | 1-deoxyxylulose-5-phosphate synthase, thiamine-requiring, FAD-requiring                             | 434   | 480.2  | 62.8  | 32.5   | 0  | 0.04 | 0.13 |
| NSCAC_0575 | infB  | translation initiation factor IF-2                                                                  | 432.7 | 399.8  | 73.9  | 32.1   | -1 | 0    | 0    |
| NSCAC_1708 | rpmA  | 50S ribosomal protein L27                                                                           | 427.3 | 852.8  | 59.8  | 129.1  | 1  | 0    | 0    |
| NSCAC_1130 | panD  | aspartate 1-decarboxylase                                                                           | 427.2 | 275.1  | 78.2  | 53.1   | -1 | 0    | 0    |
| NSCAC_1729 | hisF  | imidazole glycerol phosphate synthase, subunit HisF                                                 | 426.2 | 457    | 2.4   | 22.5   | 0  | 0.03 | 0.11 |
| NSCAC_1714 | ctaA  | Heme A synthase                                                                                     | 425   | 292.1  | 22.5  | 19     | -1 | 0    | 0    |
| NSCAC_1730 | hisIE | Phosphoribosyl-AMP cyclohydrolase/phosphoribosyl-ATP pyrophosphatase                                | 423.2 | 572.5  | 108.6 | 177.8  | 0  | 0.96 | 0.98 |
| NSCAC_1707 | rplU  | 50S ribosomal subunit protein L21                                                                   | 422.7 | 878.1  | 186.6 | 554.5  | 1  | 0.1  | 0.26 |
| NSCAC_0328 |       | conserved protein of unknown function                                                               | 421   | 345.1  | 89.6  | 36.9   | -1 | 0    | 0    |
| NSCAC_0199 | hemF  | coproporphyrinogen III oxidase                                                                      | 418.2 | 476.2  | 33.9  | 121.4  | 0  | 0.36 | 0.59 |
| NSCAC_0731 | bfr   | bacterioferritin, iron storage and detoxification protein                                           | 413.8 | 595.4  | 211.9 | 487.5  | 0  | 0.91 | 0.96 |
| NSCAC_0484 |       | HupE/UreJ protein                                                                                   | 409.6 | 666.6  | 24.8  | 50.2   | 0  | 0.17 | 0.39 |
| NSCAC_0777 |       | conserved exported protein of unknown function                                                      | 409.6 | 900.6  | 47.4  | 25.3   | 1  | 0    | 0    |
| NSCAC_0889 | rpoS  | RNA polymerase, sigma S (sigma 38) factor                                                           | 408.2 | 1861.9 | 147.1 | 1501.4 | 2  | 0    | 0.02 |
| NSCAC_0366 | rpsN  | 30S ribosomal protein S14                                                                           | 406.2 | 635.7  | 133.1 | 228.2  | 0  | 0.41 | 0.64 |
| NSCAC_0383 | cysD  | Sulfate adenylyltransferase, small subunit                                                          | 406.1 | 479.8  | 60.1  | 91.6   | 0  | 0.19 | 0.41 |
| NSCAC_0725 |       | Tellurite resistance TerB                                                                           | 405.4 | 459.9  | 47    | 204.9  | 0  | 0.28 | 0.52 |
| NSCAC_0035 |       | exported protein of unknown function                                                                | 405.2 | 782.3  | 238.8 | 773    | 0  | 0.54 | 0.73 |
| NSCAC_1750 | minD  | cell division inhibitor, a membrane ATPase, activates minC                                          | 403.6 | 485.2  | 128.5 | 79.1   | 0  | 0.42 | 0.65 |
| NSCAC_0209 | tktA  | transketolase 1, thiamin-binding                                                                    | 403.5 | 410.6  | 18.4  | 35.6   | 0  | 0    | 0.01 |
| NSCAC_1738 | ybaL  | Inner membrane protein YbaL                                                                         | 395.7 | 244.5  | 24.2  | 32.6   | -1 | 0    | 0    |

|            |      |                                                                                      |       |        |       |       |    |      |      |
|------------|------|--------------------------------------------------------------------------------------|-------|--------|-------|-------|----|------|------|
| NSCAC_0235 | nuoA | NADH-quinone oxidoreductase subunit A                                                | 395.7 | 470.8  | 124.6 | 71.6  | 0  | 0.53 | 0.73 |
| NSCAC_1717 |      | conserved protein of unknown function                                                | 394.5 | 374.9  | 104.5 | 158.4 | -1 | 0.13 | 0.32 |
| NSCAC_1107 | tsaB | tRNA threonylcarbamoyladenine biosynthesis protein TsaB                              | 389.9 | 505.9  | 83.2  | 88.2  | 0  | 0.81 | 0.9  |
| NSCAC_0401 | pyrH | uridylyl transferase                                                                 | 385.3 | 360.9  | 85.3  | 95.6  | -1 | 0    | 0.02 |
| NSCAC_0726 |      | Lipid A 3-O-deacylase-related protein (modular protein)                              | 384.1 | 479    | 81.4  | 39.4  | 0  | 0.43 | 0.66 |
| NSCAC_0930 | treZ | Malto-oligosyltrehalose trehalohydrolase                                             | 382.7 | 333.9  | 25.9  | 24.9  | -1 | 0    | 0    |
| NSCAC_1474 | suhB | inositol monophosphatase                                                             | 382.5 | 429.1  | 75.4  | 9.5   | 0  | 0.09 | 0.23 |
| NSCAC_0147 | gspG | pseudopilin, cryptic, general secretion pathway                                      | 380.1 | 315.7  | 56.8  | 61.5  | -1 | 0    | 0    |
| NSCAC_0817 | dksA | DNA-binding transcriptional regulator of rRNA transcription, DnaK suppressor protein | 378.3 | 571.1  | 291.1 | 181.2 | 0  | 0.73 | 0.86 |
| NSCAC_1553 | argC | N-acetyl-gamma-glutamyl-phosphate reductase                                          | 377.1 | 450.2  | 59.5  | 45.2  | 0  | 0.16 | 0.37 |
| NSCAC_0013 | ctpA | Carboxy-terminal-processing protease                                                 | 375.5 | 455.3  | 68.3  | 89    | 0  | 0.29 | 0.52 |
| NSCAC_1610 |      | conserved protein of unknown function                                                | 375.4 | 411.4  | 60.4  | 59.2  | 0  | 0.17 | 0.38 |
| NSCAC_0354 | rplD | 50S ribosomal subunit protein L4                                                     | 374.8 | 504.6  | 49.3  | 88.1  | 0  | 0.92 | 0.97 |
| NSCAC_0329 |      | conserved membrane protein of unknown function                                       | 374.2 | 350.4  | 61.7  | 113.1 | -1 | 0.09 | 0.25 |
| NSCAC_0243 | nuoI | NADH-quinone oxidoreductase subunit I 2                                              | 373.1 | 465.1  | 9.2   | 45.3  | 0  | 0.54 | 0.73 |
| NSCAC_0340 | secE | Protein translocase subunit SecE                                                     | 369.4 | 444.8  | 85.1  | 25.8  | 0  | 0.37 | 0.61 |
| NSCAC_1544 |      | conserved protein of unknown function                                                | 368.8 | 641.8  | 40.9  | 31.1  | 0  | 0.09 | 0.24 |
| NSCAC_1014 | aspC | Aspartate aminotransferase                                                           | 363.8 | 234.8  | 48.5  | 20.1  | -1 | 0    | 0    |
| NSCAC_0052 |      | putative tRNA-i(6)A37 modification enzyme (MiaB)                                     | 363.4 | 523.2  | 123.9 | 44.1  | 0  | 0.56 | 0.75 |
| NSCAC_0594 |      | conserved exported protein of unknown function                                       | 363.2 | 1090.9 | 26.9  | 39.3  | 1  | 0    | 0    |
| NSCAC_1706 | ispB | Trans-hexaprenyltransferase                                                          | 361.8 | 248.3  | 95.9  | 26.7  | -1 | 0    | 0    |
| NSCAC_0542 |      | protein of unknown function                                                          | 359.5 | 283.3  | 92.1  | 44.4  | -1 | 0    | 0    |
| NSCAC_0423 | glyA | serine hydroxymethyltransferase                                                      | 354.2 | 442.8  | 57.7  | 98.2  | 0  | 0.45 | 0.67 |
| NSCAC_1546 | dsbD | Thiol:disulfide interchange protein DsbD                                             | 354.1 | 434.9  | 70.7  | 9.8   | 0  | 0.47 | 0.69 |
| NSCAC_0125 | sugE | multidrug efflux system protein                                                      | 352.9 | 227.2  | 19.4  | 89.1  | -1 | 0    | 0.01 |
| NSCAC_0859 | gmd  | GDP-D-mannose dehydratase                                                            | 352   | 438.2  | 21    | 26.1  | 0  | 0.51 | 0.71 |
| NSCAC_1208 | ccmA | heme exporter subunit ; ATP-binding component of ABC superfamily                     | 350.4 | 490.4  | 79.2  | 14.1  | 0  | 0.7  | 0.83 |
| NSCAC_1523 |      | conserved membrane protein of unknown function                                       | 350   | 490.1  | 8.4   | 125.6 | 0  | 0.83 | 0.91 |
| NSCAC_0667 |      | Hopanoid biosynthesis associated membrane protein HpnM                               | 349.5 | 298.5  | 11.3  | 102.7 | -1 | 0    | 0.01 |
| NSCAC_1189 | fur  | negative regulator of ferric iron uptake                                             | 348.8 | 433.9  | 110.4 | 131.5 | 0  | 0.59 | 0.77 |

|            |      |                                                                                               |       |        |       |       |    |      |      |
|------------|------|-----------------------------------------------------------------------------------------------|-------|--------|-------|-------|----|------|------|
| NSCAC_1182 |      | conserved protein of unknown function                                                         | 346.7 | 349.9  | 38.3  | 35    | 0  | 0    | 0.01 |
| NSCAC_1549 | accB | acetyl CoA carboxylase, BCCP subunit                                                          | 345.2 | 339.8  | 42.7  | 35.7  | 0  | 0.01 | 0.03 |
| NSCAC_0975 |      | conserved protein of unknown function                                                         | 345.2 | 415.4  | 106.9 | 74.4  | 0  | 0.43 | 0.66 |
| NSCAC_1006 | himA | integration host factor (IHF), alpha subunit, DNA-binding protein, DNA replication            | 343.5 | 701    | 160.1 | 169.9 | 1  | 0.02 | 0.08 |
| NSCAC_1307 | argD | Acetylornithine aminotransferase                                                              | 343   | 266.8  | 37.7  | 41.9  | -1 | 0    | 0.01 |
| NSCAC_0084 | pntA | pyridine nucleotide transhydrogenase, alpha subunit                                           | 342.6 | 302.7  | 123.2 | 22.2  | -1 | 0.01 | 0.04 |
| NSCAC_0155 | rpsF | 30S ribosomal subunit protein S6                                                              | 342.6 | 384    | 36.1  | 133   | 0  | 0.22 | 0.45 |
| NSCAC_0990 |      | conserved membrane protein of unknown function                                                | 341.4 | 162.6  | 84.5  | 25.6  | -2 | 0    | 0    |
| NSCAC_1550 | accC | biotin carboxylase (A subunit of acetyl-CoA carboxylase)                                      | 341.3 | 447.1  | 37.2  | 29.5  | 0  | 0.81 | 0.9  |
| NSCAC_0531 | rplS | 50S ribosomal protein L19                                                                     | 338.6 | 383.3  | 60.6  | 90.2  | 0  | 0.18 | 0.39 |
| NSCAC_0375 | rpsK | 30S ribosomal protein S11                                                                     | 335.7 | 405.1  | 35.5  | 76.4  | 0  | 0.23 | 0.45 |
| NSCAC_0939 | apaH | diadenosine tetraphosphatase                                                                  | 335   | 334.5  | 50    | 63.7  | 0  | 0.08 | 0.21 |
| NSCAC_0237 | nuoC | NADH-quinone oxidoreductase subunit C                                                         | 333.1 | 477.7  | 63    | 74.3  | 0  | 0.55 | 0.74 |
| NSCAC_1649 |      | MotA/TolQ/ExbB proton channel                                                                 | 333   | 225.3  | 24.9  | 16.1  | -1 | 0    | 0    |
| NSCAC_1710 | proB | Glutamate 5-kinase                                                                            | 328.2 | 491.7  | 32.1  | 48.6  | 0  | 0.42 | 0.66 |
| NSCAC_0502 |      | ApbE family lipoprotein                                                                       | 327.9 | 254.8  | 38.6  | 17.8  | -1 | 0    | 0    |
| NSCAC_0406 | yaeL | zinc metalloproteinase                                                                        | 326.1 | 475.2  | 34.3  | 31.7  | 0  | 0.49 | 0.71 |
| NSCAC_0610 |      | Outer membrane efflux protein                                                                 | 322.8 | 545.7  | 74.7  | 80.8  | 0  | 0.03 | 0.12 |
| NSCAC_1213 | ccmF | heme lyase, CcmF subunit                                                                      | 319.2 | 252.7  | 29.5  | 4.8   | -1 | 0    | 0    |
| NSCAC_1119 | pgi  | Glucose-6-phosphate isomerase                                                                 | 316.3 | 314.4  | 89.4  | 83.9  | 0  | 0.04 | 0.12 |
| NSCAC_1275 |      | conserved protein of unknown function                                                         | 315   | 306.5  | 70.5  | 75.1  | 0  | 0.03 | 0.1  |
| NSCAC_1774 | atpB | F0 sector of membrane-bound ATP synthase, subunit a                                           | 314.9 | 484.8  | 98.5  | 77.1  | 0  | 0.43 | 0.66 |
| NSCAC_0478 | ureB | Urease beta subunit                                                                           | 312.7 | 1547.3 | 89.6  | 76.3  | 2  | 0    | 0    |
| NSCAC_0942 | pgl  | 6-phosphogluconolactonase                                                                     | 312.7 | 177.7  | 47.5  | 43.8  | -1 | 0    | 0    |
| NSCAC_1303 | clpA | ATPase and specificity subunit of ClpA-ClpP ATP-dependent serine protease, chaperone activity | 312.5 | 422.1  | 52.6  | 44.6  | 0  | 1    | 1    |
| NSCAC_1211 |      | Heme exporter protein CcmD                                                                    | 311.7 | 827    | 195.4 | 132.7 | 1  | 0.18 | 0.4  |
| NSCAC_0666 |      | Hopanoid biosynthesis associated RND transporter like protein HpnN                            | 311   | 289.5  | 32.6  | 8     | -1 | 0    | 0    |
| NSCAC_0188 |      | Methyltransferase FkbM family                                                                 | 308.5 | 325.6  | 113.3 | 111   | 0  | 0.16 | 0.36 |
| NSCAC_0030 | fxsA | inner membrane protein                                                                        | 307.9 | 283    | 111.8 | 53.1  | -1 | 0.08 | 0.22 |
| NSCAC_0913 | fabF | 3-oxoacyl-[acyl-carrier-protein] synthase II                                                  | 307.4 | 356.5  | 39.8  | 32.9  | 0  | 0.25 | 0.47 |

|            |      |                                                                                                    |       |       |       |       |    |      |      |
|------------|------|----------------------------------------------------------------------------------------------------|-------|-------|-------|-------|----|------|------|
| NSCAC_0900 |      | conserved exported protein of unknown function                                                     | 307.3 | 333.3 | 142.3 | 188.4 | 0  | 0.37 | 0.61 |
| NSCAC_0925 | clpX | ATP-dependent Clp protease ATP-binding subunit                                                     | 306.7 | 421.3 | 94.4  | 67.3  | 0  | 0.87 | 0.93 |
| NSCAC_1555 |      | Fe2-S2-type ferredoxin                                                                             | 306.2 | 307.1 | 79.3  | 73    | 0  | 0.05 | 0.15 |
| NSCAC_0917 | fabH | 3-oxoacyl-[acyl-carrier-protein] synthase III                                                      | 303.8 | 340.7 | 12.6  | 27.6  | 0  | 0.15 | 0.35 |
| NSCAC_1771 | atpH | F1 sector of membrane-bound ATP synthase, delta subunit                                            | 302   | 252.9 | 49    | 93.4  | -1 | 0    | 0.01 |
| NSCAC_0880 | pheA | Chorismate mutase / Prephenate dehydratase                                                         | 300.5 | 246.5 | 53.2  | 22    | -1 | 0    | 0    |
| NSCAC_0838 |      | Ion transport protein                                                                              | 300   | 159.2 | 48.7  | 57.7  | -1 | 0    | 0    |
| NSCAC_1775 |      | conserved membrane protein of unknown function                                                     | 299.7 | 402.2 | 45.3  | 70.7  | 0  | 0.96 | 0.98 |
| NSCAC_0341 | nusG | transcription antitermination protein                                                              | 298.3 | 511.2 | 34.9  | 83.7  | 0  | 0.06 | 0.18 |
| NSCAC_0583 | argG | Argininosuccinate synthase                                                                         | 296.7 | 371.6 | 99.5  | 21.2  | 0  | 0.65 | 0.81 |
| NSCAC_0924 | lon  | DNA-binding ATP-dependent protease La                                                              | 296.7 | 345.1 | 62.8  | 90.9  | 0  | 0.23 | 0.45 |
| NSCAC_1435 |      | conserved membrane protein of unknown function                                                     | 295.1 | 404.8 | 31.9  | 22.2  | 0  | 0.99 | 0.99 |
| NSCAC_0906 | terA | Tellurium resistance protein TerA                                                                  | 295   | 398.7 | 57    | 34.1  | 0  | 0.94 | 0.98 |
| NSCAC_0951 |      | Outer membrane lipoprotein Slp                                                                     | 293.4 | 348   | 77.5  | 48    | 0  | 0.44 | 0.66 |
| NSCAC_1012 | thrS | threonyl-tRNA synthetase                                                                           | 291.8 | 346.4 | 79.7  | 22.1  | 0  | 0.33 | 0.57 |
| NSCAC_1265 | sufB | component of SufBCD complex                                                                        | 290.4 | 192.8 | 37    | 19.2  | -1 | 0    | 0    |
| NSCAC_0918 | plsX | fatty acid/phospholipid synthesis protein                                                          | 289.9 | 438.2 | 93.5  | 48.7  | 0  | 0.34 | 0.57 |
| NSCAC_0074 |      | conserved exported protein of unknown function                                                     | 289.5 | 253.7 | 15.2  | 9.9   | -1 | 0    | 0    |
| NSCAC_1172 |      | Secretion protein HlyD family                                                                      | 289   | 483.1 | 24.6  | 24.9  | 0  | 0.03 | 0.11 |
| NSCAC_0919 | rpmF | 50S ribosomal subunit protein L32                                                                  | 288.9 | 852.2 | 29.9  | 62.6  | 1  | 0    | 0    |
| NSCAC_0233 | tpiA | Triosephosphate isomerase                                                                          | 286.4 | 283.3 | 148.2 | 37.6  | 0  | 0.15 | 0.34 |
| NSCAC_0450 |      | exported protein of unknown function                                                               | 286   | 540.9 | 65.1  | 221.7 | 0  | 0.05 | 0.16 |
| NSCAC_0405 | dxr  | 1-deoxy-D-xylulose 5-phosphate reductoisomerase                                                    | 285.8 | 241.3 | 49    | 18.7  | -1 | 0    | 0.01 |
| NSCAC_0327 | secD | SecYEG protein translocase auxillary subunit                                                       | 283.6 | 255.9 | 78    | 25.6  | -1 | 0    | 0.01 |
| NSCAC_1178 |      | conserved protein of unknown function                                                              | 283.4 | 260   | 73.5  | 35.5  | -1 | 0.01 | 0.03 |
| NSCAC_1634 | infA | protein chain initiation factor IF-1                                                               | 283.1 | 273.8 | 117.6 | 20.4  | 0  | 0.07 | 0.21 |
| NSCAC_0578 | rpsO | 30S ribosomal subunit protein S15                                                                  | 282.4 | 400.8 | 81.4  | 104.1 | 0  | 0.72 | 0.85 |
| NSCAC_0545 | lpdA | Pyruvate dehydrogenase complex, dihydrolipoamide dehydrogenase component E3                        | 281.7 | 377.9 | 37.2  | 27    | 0  | 0.93 | 0.97 |
| NSCAC_0277 |      | Phospholipid/glycerol acyltransferase                                                              | 281.2 | 314.4 | 51.4  | 68.6  | 0  | 0.32 | 0.55 |
| NSCAC_0347 | rpoC | DNA-directed RNA polymerase beta' chain (Transcriptase beta' chain) (RNA polymerase beta' subunit) | 280.9 | 375.3 | 55.1  | 77    | 0  | 0.9  | 0.96 |

|            |      |                                                                      |       |       |       |       |    |      |      |
|------------|------|----------------------------------------------------------------------|-------|-------|-------|-------|----|------|------|
| NSCAC_1732 | hitA | Protein HitA                                                         | 280.9 | 400.6 | 114.9 | 28.3  | 0  | 0.76 | 0.87 |
| NSCAC_0574 | nusA | transcription termination/antitermination L factor                   | 280.2 | 348.9 | 119.4 | 79    | 0  | 0.69 | 0.83 |
| NSCAC_0963 | trmU | tRNA (5-methylaminomethyl-2-thiouridylate)-methyltransferase         | 280.2 | 399   | 55.5  | 7.1   | 0  | 0.6  | 0.77 |
| NSCAC_1011 |      | protein chain initiation factor IF-3 (fragment)                      | 280   | 344.2 | 112.7 | 45.1  | 0  | 0.69 | 0.83 |
| NSCAC_0940 | apaG | protein associated with Co <sup>2+</sup> and Mg <sup>2+</sup> efflux | 279.4 | 263.9 | 80.8  | 5.4   | -1 | 0.01 | 0.05 |
| NSCAC_1325 | rpoH | RNA polymerase, sigma 32 (sigma H) factor                            | 278.1 | 609.1 | 115.4 | 181.7 | 1  | 0    | 0.02 |
| NSCAC_1250 | mucD | putative periplasmic serine endoprotease DegP-like                   | 277.6 | 255.9 | 52.2  | 75.8  | -1 | 0    | 0.02 |
| NSCAC_1292 | dapA | dihydrodipicolinate synthase                                         | 277   | 311.4 | 46.9  | 49.7  | 0  | 0.07 | 0.2  |
| NSCAC_0004 | fbp  | Fructose-1,6-bisphosphatase class 1                                  | 275.8 | 292.1 | 44.4  | 53.4  | 0  | 0.11 | 0.27 |
| NSCAC_0399 | rpsB | 30S ribosomal subunit protein S2                                     | 275.6 | 405.7 | 94.3  | 71.6  | 0  | 0.5  | 0.71 |
| NSCAC_0693 |      | conserved protein of unknown function                                | 274.4 | 257.2 | 133   | 87.4  | -1 | 0.08 | 0.23 |
| NSCAC_0573 | yhbC | conserved hypothetical protein                                       | 274.3 | 220.7 | 68.4  | 36.1  | -1 | 0    | 0.02 |
| NSCAC_0297 |      | conserved protein of unknown function                                | 273.3 | 188.4 | 40.5  | 39    | -1 | 0    | 0    |
| NSCAC_0400 | tsf  | protein chain elongation factor EF-Ts                                | 273.3 | 316.4 | 62.3  | 124.3 | 0  | 0.31 | 0.54 |
| NSCAC_0494 |      | conserved exported protein of unknown function                       | 272.8 | 207.9 | 69.2  | 17.4  | -1 | 0    | 0    |
| NSCAC_1502 |      | conserved protein of unknown function                                | 272.8 | 367.4 | 77.9  | 148.4 | 0  | 0.95 | 0.98 |
| NSCAC_1192 |      | conserved protein of unknown function                                | 270.5 | 357.7 | 55.8  | 47.6  | 0  | 0.83 | 0.91 |
| NSCAC_0758 | acnA | Aconitate hydratase                                                  | 270.5 | 277.2 | 32.6  | 17.4  | 0  | 0.03 | 0.12 |
| NSCAC_1199 |      | conserved protein of unknown function                                | 269.1 | 369.9 | 59.9  | 112.9 | 0  | 0.92 | 0.97 |
| NSCAC_1018 |      | protein of unknown function                                          | 267.3 | 0     | 51.8  | 0     | NA | NA   | NA   |
| NSCAC_1266 |      | FeS assembly SUF system regulator                                    | 267.2 | 189.1 | 21.5  | 17.9  | -1 | 0    | 0    |
| NSCAC_0969 | mdmC | O-methyltransferase MdmC                                             | 267   | 294   | 126.1 | 81.4  | 0  | 0.35 | 0.58 |
| NSCAC_1469 | pilA | Fimbrial protein                                                     | 265.6 | 349.4 | 56    | 20.4  | 0  | 0.82 | 0.91 |
| NSCAC_0544 | aceF | Pyruvate dehydrogenase, dihydrolipoyltransacetylase component E2     | 265.2 | 352.6 | 17.1  | 45.3  | 0  | 0.82 | 0.9  |
| NSCAC_1223 |      | conserved protein of unknown function                                | 263.7 | 395.4 | 45.7  | 25.7  | 0  | 0.33 | 0.56 |
| NSCAC_0178 | yadH | ABC transporter                                                      | 263.5 | 235.1 | 31.3  | 77.4  | -1 | 0.05 | 0.15 |
| NSCAC_1287 | ilvH | Acetolactate synthase, small subunit                                 | 261.8 | 314.3 | 66.8  | 28    | 0  | 0.32 | 0.56 |
| NSCAC_0878 | serC | phosphoserine aminotransferase                                       | 261.4 | 406.1 | 50.2  | 124.4 | 0  | 0.34 | 0.57 |
| NSCAC_1064 |      | conserved protein of unknown function                                | 260.4 | 337.6 | 55.5  | 121.9 | 0  | 0.69 | 0.83 |
| NSCAC_1049 |      | Sell domain protein repeat-containing protein (fragment)             | 259.7 | 320   | 102.4 | 58.5  | 0  | 0.62 | 0.79 |



|            |      |                                                         |       |        |       |       |    |      |      |
|------------|------|---------------------------------------------------------|-------|--------|-------|-------|----|------|------|
| NSCAC_0757 |      | conserved protein of unknown function                   | 259.3 | 460.3  | 56.9  | 234.8 | 0  | 0.19 | 0.4  |
| NSCAC_0221 | pepP | proline aminopeptidase P II                             | 259.1 | 207.8  | 67.7  | 29.9  | -1 | 0    | 0    |
| NSCAC_0212 | pykA | pyruvate kinase II                                      | 257.8 | 335.4  | 56.4  | 26.1  | 0  | 0.76 | 0.87 |
| NSCAC_0819 |      | protein of unknown function                             | 257.4 | 0      | 48.7  | 0     | NA | NA   | NA   |
| NSCAC_1593 | hemE | uroporphyrinogen decarboxylase                          | 257   | 311.5  | 15.7  | 28.3  | 0  | 0.41 | 0.64 |
| NSCAC_0616 |      | conserved protein of unknown function                   | 256.9 | 155.5  | 66    | 5.3   | -1 | 0    | 0    |
| NSCAC_1304 | clpS | regulatory protein for ClpA substrate specificity       | 256.9 | 358.6  | 98.5  | 129.3 | 0  | 0.83 | 0.91 |
| NSCAC_0374 | rpsM | 30S ribosomal protein S13                               | 255.9 | 483.6  | 189.8 | 272.7 | 1  | 0.41 | 0.64 |
| NSCAC_0704 | gpmA | Phosphoglyceromutase                                    | 255.9 | 220.4  | 36.9  | 18.4  | -1 | 0    | 0    |
| NSCAC_1661 | secF | Protein translocase subunit SecF                        | 255.4 | 329.8  | 65.9  | 48.9  | 0  | 0.7  | 0.84 |
| NSCAC_0784 | perM | putative permease                                       | 254.8 | 428.9  | 26.8  | 32.5  | 0  | 0.11 | 0.28 |
| NSCAC_0197 | prkB | phosphoribulokinase                                     | 254.7 | 330.7  | 68.5  | 54.3  | 0  | 0.79 | 0.89 |
| NSCAC_0427 | rnhB | ribonuclease HII, degrades RNA of DNA-RNA hybrids       | 253.8 | 208.2  | 40.1  | 33.5  | -1 | 0    | 0.01 |
| NSCAC_1233 | hupB | DNA-binding protein HU-beta                             | 252.7 | 396.9  | 102   | 150.9 | 0  | 0.43 | 0.66 |
| NSCAC_1651 |      | conserved exported protein of unknown function          | 252.6 | 222.2  | 108.3 | 60.2  | -1 | 0.02 | 0.09 |
| NSCAC_0775 |      | Sigma-54 factor interaction domain-containing protein   | 252.2 | 507.8  | 13.6  | 46.8  | 1  | 0    | 0.02 |
| NSCAC_0927 | tig  | Trigger factor                                          | 252.1 | 315.8  | 61.2  | 86.1  | 0  | 0.57 | 0.75 |
| NSCAC_0732 |      | NnrS family protein                                     | 251.5 | 195.7  | 4.7   | 12.8  | -1 | 0    | 0    |
| NSCAC_1444 |      | Toluene tolerance family protein                        | 251.5 | 337.9  | 105   | 118   | 0  | 1    | 1    |
| NSCAC_1486 | dacC | D-alanyl-D-alanine carboxypeptidase DacC                | 251.3 | 246.4  | 57.1  | 23.9  | 0  | 0    | 0.02 |
| NSCAC_0621 |      | putative Spore coat protein CotH                        | 251.2 | 454.8  | 9.3   | 110.1 | 0  | 0.08 | 0.22 |
| NSCAC_0022 | plsY | 1-acyl glycerol-3-phosphate synthetase component        | 249.6 | 304.8  | 24.7  | 85.1  | 0  | 0.62 | 0.78 |
| NSCAC_0033 | yqjF | putative quinol oxidase subunit                         | 249.3 | 220.5  | 91.4  | 74.2  | -1 | 0.02 | 0.09 |
| NSCAC_0480 | ureE | Urease accessory protein UreE                           | 249   | 2368.2 | 41.6  | 332.4 | 3  | 0    | 0    |
| NSCAC_0614 |      | conserved protein of unknown function                   | 248.5 | 488    | 39.8  | 332.5 | 0  | 0.17 | 0.38 |
| NSCAC_1742 | rplY | 50S ribosomal protein L25                               | 245.9 | 392.2  | 91.1  | 138.3 | 0  | 0.34 | 0.57 |
| NSCAC_0342 | rplK | 50S ribosomal protein L11                               | 244.9 | 352.7  | 88.7  | 113.8 | 0  | 0.69 | 0.83 |
| NSCAC_0547 |      | Sel1 repeat protein (fragment)                          | 244.8 | 476.7  | 72.1  | 33.8  | 1  | 0    | 0.01 |
| NSCAC_1688 |      | conserved exported protein of unknown function          | 242.9 | 350.9  | 46.8  | 40.8  | 0  | 0.5  | 0.71 |
| NSCAC_1214 | ccmG | periplasmic thioredoxin of cytochrome c-type biogenesis | 242.9 | 271    | 48.1  | 41.8  | 0  | 0.14 | 0.34 |
| NSCAC_1302 |      | conserved protein of unknown function                   | 238.1 | 265.2  | 92.6  | 59.1  | 0  | 0.31 | 0.54 |

|            |      |                                                                                                                                                         |       |        |       |       |    |      |      |
|------------|------|---------------------------------------------------------------------------------------------------------------------------------------------------------|-------|--------|-------|-------|----|------|------|
| NSCAC_0568 |      | Serine--pyruvate transaminase                                                                                                                           | 237.6 | 327.7  | 46.6  | 69.2  | 0  | 0.88 | 0.94 |
| NSCAC_1068 | trpB | tryptophan synthase beta chain                                                                                                                          | 237.6 | 257.9  | 10.8  | 55.6  | 0  | 0.21 | 0.44 |
| NSCAC_0887 | ihfB | integration host factor (IHF), DNA-binding protein, beta subunit                                                                                        | 236.9 | 227.5  | 122.4 | 91.5  | 0  | 0.19 | 0.41 |
| NSCAC_0162 |      | conserved membrane protein of unknown function                                                                                                          | 236.5 | 325.8  | 54.2  | 69.9  | 0  | 0.81 | 0.9  |
| NSCAC_0883 | aroA | 3-phosphoshikimate 1-carboxyvinyltransferase                                                                                                            | 236.1 | 237.5  | 21.7  | 21.1  | 0  | 0.04 | 0.14 |
| NSCAC_1065 | folC | bifunctional folylpolyglutamate synthase and dihydrofolate synthase                                                                                     | 235.5 | 290    | 21.3  | 24.9  | 0  | 0.49 | 0.7  |
| NSCAC_1297 |      | conserved exported protein of unknown function                                                                                                          | 235   | 510.9  | 46    | 99.3  | 1  | 0    | 0    |
| NSCAC_0916 | fabD | malonyl-CoA-[acyl-carrier-protein] transacylase                                                                                                         | 233.2 | 304.6  | 82.3  | 32.5  | 0  | 0.92 | 0.97 |
| NSCAC_1412 | ftsA | ATP-binding cell division protein involved in recruitment of FtsK to Z ring                                                                             | 232.9 | 386.7  | 7.9   | 61.9  | 0  | 0.15 | 0.35 |
| NSCAC_0879 | serA | D-3-phosphoglycerate dehydrogenase                                                                                                                      | 232.8 | 396.8  | 52.6  | 91.1  | 0  | 0.08 | 0.21 |
| NSCAC_1123 | ndk  | nucleoside diphosphate kinase (NDK) (NDP kinase) (Nucleoside-2-P kinase)                                                                                | 232.8 | 221.6  | 14.4  | 48.3  | -1 | 0.01 | 0.03 |
| NSCAC_0665 | ispG | 4-hydroxy-3-methylbut-2-en-1-yl diphosphate synthase                                                                                                    | 232.4 | 403.8  | 60.5  | 29.4  | 0  | 0.03 | 0.12 |
| NSCAC_0739 |      | RDD domain containing protein                                                                                                                           | 232.2 | 260    | 55    | 22.9  | 0  | 0.21 | 0.43 |
| NSCAC_1397 |      | Protein-tyrosine phosphatase, low molecular weight                                                                                                      | 231.9 | 549.3  | 143.2 | 290.9 | 1  | 0.03 | 0.12 |
| NSCAC_0696 |      | conserved protein of unknown function                                                                                                                   | 231.8 | 239.9  | 54.8  | 58.4  | 0  | 0.2  | 0.42 |
| NSCAC_1160 | acrB | multidrug efflux system protein                                                                                                                         | 231.7 | 391.7  | 21.4  | 11.7  | 0  | 0.14 | 0.33 |
| NSCAC_1271 | trpG | bifunctional protein:[Includes: para-aminobenzoate synthase glutamine amidotransferase component II (ADC synthase); anthranilate synthase component II] | 231.4 | 414.5  | 97.6  | 28    | 0  | 0.06 | 0.18 |
| NSCAC_0177 | uppP | Undecaprenyl-diphosphatase                                                                                                                              | 230.1 | 247.4  | 61.7  | 41.1  | 0  | 0.24 | 0.47 |
| NSCAC_1437 |      | Mammalian cell entry related domain protein                                                                                                             | 230   | 270.1  | 34.5  | 42    | 0  | 0.21 | 0.43 |
| NSCAC_0036 |      | protein of unknown function                                                                                                                             | 229.9 | 779.1  | 113.3 | 305.1 | 1  | 0    | 0    |
| NSCAC_0526 |      | Cytochrome c assembly protein                                                                                                                           | 229.9 | 134.5  | 9.5   | 36.2  | -1 | 0    | 0    |
| NSCAC_1337 |      | Asparagine synthetase                                                                                                                                   | 229.2 | 350.3  | 50.6  | 10.3  | 0  | 0.25 | 0.48 |
| NSCAC_0211 | pgk  | phosphoglycerate kinase                                                                                                                                 | 229   | 269.2  | 24    | 40.1  | 0  | 0.18 | 0.39 |
| NSCAC_0855 |      | putative Glycosyl transferase group 1                                                                                                                   | 228.9 | 289.1  | 46.9  | 84.2  | 0  | 0.58 | 0.76 |
| NSCAC_0251 | rbsK | Ribokinase                                                                                                                                              | 228.3 | 261.3  | 71.2  | 78.7  | 0  | 0.29 | 0.52 |
| NSCAC_0935 |      | conserved protein of unknown function                                                                                                                   | 227.1 | 264.5  | 61.9  | 146.1 | 0  | 0.47 | 0.68 |
| NSCAC_0596 |      | conserved exported protein of unknown function                                                                                                          | 226.2 | 2026.5 | 53.5  | 114.5 | 3  | 0    | 0    |
| NSCAC_1420 | mraY | phospho-N-acetylmuramoyl-pentapeptide transferase                                                                                                       | 226.1 | 372.9  | 31.1  | 34.9  | 0  | 0.22 | 0.44 |

|            |      |                                                                                                                                                            |       |       |       |       |    |      |      |
|------------|------|------------------------------------------------------------------------------------------------------------------------------------------------------------|-------|-------|-------|-------|----|------|------|
| NSCAC_1097 |      | Helix-turn-helix protein                                                                                                                                   | 225.5 | 171.8 | 53.3  | 38.7  | -1 | 0    | 0.01 |
| NSCAC_1215 | ccmH | Cytochrome c-type biogenesis protein CcmH                                                                                                                  | 223.7 | 324.8 | 57.4  | 53    | 0  | 0.6  | 0.77 |
| NSCAC_0404 |      | Phosphatidate cytidyltransferase                                                                                                                           | 223.5 | 230   | 40.3  | 38.7  | 0  | 0.09 | 0.25 |
| NSCAC_1781 | yidC | Membrane protein insertase YidC                                                                                                                            | 223.3 | 252   | 74.3  | 28.1  | 0  | 0.25 | 0.48 |
| NSCAC_0477 | ureA | Urease gamma subunit                                                                                                                                       | 223.3 | 497.9 | 127.7 | 113.4 | 1  | 0.06 | 0.17 |
| NSCAC_1537 | ubiD | 3-octaprenyl-4-hydroxybenzoate decarboxylase                                                                                                               | 223   | 156   | 47.2  | 21.1  | -1 | 0    | 0    |
| NSCAC_0379 | ubiG | bifunctional 3-demethylubiquinone-9 3-methyltransferase and 2-octaprenyl-6-hydroxy phenol methylase                                                        | 221.8 | 356.5 | 19.9  | 55.5  | 0  | 0.24 | 0.47 |
| NSCAC_0207 | dnaJ | chaperone Hsp40, co-chaperone with DnaK                                                                                                                    | 221.6 | 332.6 | 75.1  | 20.8  | 0  | 0.45 | 0.67 |
| NSCAC_1231 | fabI | enoyl-[acyl-carrier-protein] reductase, NADH-dependent                                                                                                     | 221   | 175.9 | 36.6  | 11.8  | -1 | 0    | 0    |
| NSCAC_1217 |      | protein of unknown function                                                                                                                                | 220.9 | 501.3 | 57.6  | 309.6 | 1  | 0.03 | 0.11 |
| NSCAC_0346 | rpoB | DNA-directed RNA polymerase beta chain (Transcriptase beta chain) (RNA polymerase beta subunit)                                                            | 220.8 | 307.5 | 3.7   | 35    | 0  | 0.86 | 0.93 |
| NSCAC_0227 | carB | carbamoyl-phosphate synthase, large subunit                                                                                                                | 220.7 | 211.4 | 10.2  | 5.6   | -1 | 0    | 0.02 |
| NSCAC_0752 | cysE | serine acetyltransferase                                                                                                                                   | 220.5 | 107.8 | 42.1  | 30    | -1 | 0    | 0    |
| NSCAC_1643 |      | protein of unknown function                                                                                                                                | 220.3 | 157.5 | 101   | 23.8  | -1 | 0.01 | 0.04 |
| NSCAC_0206 | dnaK | chaperone Hsp70 in DNA biosynthesis/cell division                                                                                                          | 219.5 | 409.4 | 32.6  | 128.2 | 0  | 0.04 | 0.13 |
| NSCAC_0424 | ribD | Riboflavin biosynthesis protein RibD [Includes: Diaminohydroxyphosphoribosylaminopyrimidine deaminase ; 5-amino-6-(5-phosphoribosylamino)uracil reductase] | 219.1 | 301.1 | 21.9  | 62.2  | 0  | 0.94 | 0.98 |
| NSCAC_0337 | hslV | peptidase component of the HslUV protease                                                                                                                  | 219   | 261.1 | 69.3  | 13.6  | 0  | 0.47 | 0.69 |
| NSCAC_1261 | nifU | NifU-like protein                                                                                                                                          | 218.5 | 158.1 | 84.1  | 41.4  | -1 | 0    | 0.01 |
| NSCAC_1554 | erpA | Iron-sulfur cluster insertion protein ErpA 2                                                                                                               | 218.3 | 375.3 | 61.8  | 172.1 | 0  | 0.24 | 0.47 |
| NSCAC_1477 | sucC | succinyl-CoA ligase subunit beta                                                                                                                           | 218.2 | 195   | 14.9  | 8.4   | -1 | 0    | 0.01 |
| NSCAC_0245 | nuoK | NADH-quinone oxidoreductase subunit K                                                                                                                      | 218.1 | 186   | 24.2  | 51.9  | -1 | 0.01 | 0.04 |
| NSCAC_1715 |      | conserved protein of unknown function                                                                                                                      | 217.3 | 174.6 | 28.9  | 30.7  | -1 | 0    | 0    |
| NSCAC_0964 | hflD | High frequency lysogenization protein HflD homolog                                                                                                         | 216.8 | 250   | 96.5  | 25.9  | 0  | 0.5  | 0.71 |
| NSCAC_1493 |      | Uncharacterized 37.6 kDa protein in cld 5'region                                                                                                           | 216.6 | 282.4 | 86.9  | 6.2   | 0  | 0.93 | 0.97 |
| NSCAC_0580 | fabA | beta-hydroxydecanoyl thioester dehydrase                                                                                                                   | 216.2 | 216.8 | 102.5 | 5.9   | 0  | 0.14 | 0.33 |
| NSCAC_1491 | gatA | aspartyl/glutamyl-tRNA(Asn/Gln) amidotransferase subunit A                                                                                                 | 216   | 290.2 | 12.1  | 30.7  | 0  | 0.95 | 0.98 |
| NSCAC_0163 | lpxD | UDP-3-O-acylglucosamine N-acyltransferase                                                                                                                  | 215.1 | 317.7 | 25.6  | 65.4  | 0  | 0.63 | 0.79 |
| NSCAC_0860 | wcaI | putative glycosyl transferase                                                                                                                              | 214.8 | 143.6 | 41.1  | 14.4  | -1 | 0    | 0    |

|            |           |                                                                         |       |       |      |       |    |      |      |
|------------|-----------|-------------------------------------------------------------------------|-------|-------|------|-------|----|------|------|
| NSCAC_0468 |           | conserved protein of unknown function                                   | 213.8 | 428.2 | 47.4 | 186.4 | 1  | 0.04 | 0.14 |
| NSCAC_0161 |           | putative oxidoreductase, aryl-alcohol dehydrogenase like protein        | 213.4 | 310.8 | 17.6 | 23.5  | 0  | 0.54 | 0.74 |
| NSCAC_0523 |           | conserved protein of unknown function                                   | 213.2 | 184.6 | 49.1 | 45    | -1 | 0.03 | 0.1  |
| NSCAC_1528 | metK      | S-adenosylmethionine synthase                                           | 213   | 303   | 33.8 | 15.8  | 0  | 0.68 | 0.82 |
| NSCAC_0475 |           | Urea transporter                                                        | 212.3 | 456.3 | 22.6 | 51.1  | 1  | 0    | 0    |
| NSCAC_1647 |           | TonB family C-terminal domain protein                                   | 212   | 333.3 | 71.1 | 27.6  | 0  | 0.27 | 0.5  |
| NSCAC_1066 | accD      | acetyl-CoA carboxylase, beta (carboxyltransferase) subunit              | 211.5 | 244.5 | 23   | 19.1  | 0  | 0.24 | 0.47 |
| NSCAC_1744 | ispE      | 4-diphosphocytidyl-2-C-methylerythritol kinase                          | 211.2 | 340.4 | 36.7 | 14.4  | 0  | 0.16 | 0.37 |
| NSCAC_1206 |           | GTP-binding protein HSR1-related protein                                | 211   | 108   | 22.3 | 7.4   | -1 | 0    | 0    |
| NSCAC_1547 |           | Alkyl hydroperoxide reductase/ Thiol specific antioxidant/ Mal allergen | 210.7 | 321   | 32   | 75.4  | 0  | 0.38 | 0.62 |
| NSCAC_1147 | yhjE      | putative transporter                                                    | 210.5 | 201.1 | 50.4 | 47.1  | -1 | 0.1  | 0.26 |
| NSCAC_0734 |           | conserved protein of unknown function                                   | 208.4 | 317.7 | 38.5 | 60.7  | 0  | 0.29 | 0.52 |
| NSCAC_0921 | purF      | amidophosphoribosyltransferase                                          | 207.4 | 256.3 | 14.9 | 68.1  | 0  | 0.45 | 0.67 |
| NSCAC_1005 |           | Regulatory protein MerR                                                 | 206.7 | 460.5 | 41   | 71.1  | 1  | 0    | 0    |
| NSCAC_0595 |           | conserved exported protein of unknown function                          | 206.7 | 703.3 | 13.7 | 49.3  | 1  | 0    | 0    |
| NSCAC_1086 |           | putative [NiFe]-hydrogenase, large subunit HyfG                         | 206.5 | 247.5 | 32.6 | 76.8  | 0  | 0.58 | 0.76 |
| NSCAC_1716 |           | putative Cytochrome oxidase biogenesis protein SurfI                    | 206.3 | 138.4 | 38.8 | 3.8   | -1 | 0    | 0    |
| NSCAC_1152 |           | conserved membrane protein of unknown function                          | 206.2 | 238.7 | 11.6 | 28.3  | 0  | 0.27 | 0.51 |
| NSCAC_0029 |           | protein of unknown function                                             | 206.1 | 142.5 | 24.4 | 40.4  | -1 | 0    | 0.01 |
| NSCAC_0201 | pyrD      | Dihydroorotate dehydrogenase B (NAD(+)), catalytic subunit              | 206   | 196.8 | 57.7 | 32.3  | -1 | 0.07 | 0.2  |
| NSCAC_0525 |           | protein of unknown function                                             | 205.9 | 218.7 | 38.7 | 25.1  | 0  | 0.05 | 0.16 |
| NSCAC_1115 | gcvP<br>A | putative glycine dehydrogenase (decarboxylating) subunit 1              | 205.3 | 288.8 | 46   | 54    | 0  | 0.73 | 0.86 |
| NSCAC_0501 |           | conserved protein of unknown function                                   | 204.9 | 170.2 | 9    | 12.5  | -1 | 0    | 0    |
| NSCAC_0261 |           | putative Lipoprotein                                                    | 204   | 351.1 | 52.4 | 51.3  | 0  | 0.06 | 0.19 |
| NSCAC_0239 | nuoE      | NADH-quinone oxidoreductase subunit E                                   | 203.9 | 295.9 | 63.5 | 33.2  | 0  | 0.84 | 0.92 |
| NSCAC_0974 | pyk       | Pyruvate kinase                                                         | 203.6 | 193.3 | 16.8 | 18    | -1 | 0    | 0.01 |
| NSCAC_1309 | mpgI      | Mannose-1-phosphate guanyltransferase                                   | 203.3 | 270.6 | 7.9  | 26.6  | 0  | 0.91 | 0.97 |
| NSCAC_0265 |           | exported protein of unknown function                                    | 201.7 | 357.1 | 53.5 | 99.6  | 0  | 0.06 | 0.18 |
| NSCAC_1284 | leuA      | 2-isopropylmalate synthase                                              | 201.6 | 170.1 | 45.2 | 18.1  | -1 | 0    | 0    |
| NSCAC_1351 | ilvD      | dihydroxy-acid dehydratase                                              | 201.5 | 177.2 | 36.9 | 12.8  | -1 | 0    | 0    |

|            |      |                                                                                                                                       |       |       |       |       |    |      |      |
|------------|------|---------------------------------------------------------------------------------------------------------------------------------------|-------|-------|-------|-------|----|------|------|
| NSCAC_1639 | guaB | IMP dehydrogenase                                                                                                                     | 200.6 | 217.5 | 48.8  | 29.4  | 0  | 0.07 | 0.2  |
| NSCAC_1418 | ftsW | integral membrane protein involved in stabilizing FstZ ring during cell division                                                      | 199.8 | 300.7 | 19.7  | 73.7  | 0  | 0.58 | 0.76 |
| NSCAC_1650 |      | Outer membrane transport energization protein ExbB                                                                                    | 199.6 | 155.9 | 31.7  | 27.4  | -1 | 0    | 0    |
| NSCAC_1341 |      | Sugar transferase, PEP-CTERM/EpsH1 system associated                                                                                  | 199.6 | 198.3 | 12.9  | 19.3  | 0  | 0.03 | 0.1  |
| NSCAC_1143 |      | conserved exported protein of unknown function                                                                                        | 199.4 | 251.5 | 182.4 | 234.8 | 0  | 0.92 | 0.97 |
| NSCAC_0387 | surE | broad specificity 5'(3')-nucleotidase and polyphosphatase                                                                             | 198.6 | 251.9 | 47.6  | 36.2  | 0  | 0.67 | 0.82 |
| NSCAC_1343 |      | Polysaccharide deactylase family protein, PEP-CTERM locus subfamily                                                                   | 198.5 | 227.3 | 17.3  | 46.4  | 0  | 0.14 | 0.33 |
| NSCAC_0885 | cmk  | cytidylate kinase                                                                                                                     | 197.2 | 236.1 | 49.5  | 36.4  | 0  | 0.5  | 0.71 |
| NSCAC_1135 |      | conserved membrane protein of unknown function                                                                                        | 197.2 | 205.2 | 36.3  | 72.4  | 0  | 0.21 | 0.43 |
| NSCAC_0762 |      | putative Hopanoid biosynthesis associated glycosyl transferase protein HpnI                                                           | 197   | 153.1 | 23.6  | 15.9  | -1 | 0    | 0    |
| NSCAC_1355 |      | conserved protein of unknown function                                                                                                 | 196.7 | 838.7 | 30.5  | 33.2  | 2  | 0    | 0    |
| NSCAC_1008 | pheS | phenylalanine tRNA synthetase, alpha subunit                                                                                          | 196.1 | 165.8 | 35.4  | 22.2  | -1 | 0    | 0.02 |
| NSCAC_1216 |      | Cytochrome c-type biogenesis protein CcmI                                                                                             | 195.8 | 218.4 | 57.5  | 15.7  | 0  | 0.16 | 0.37 |
| NSCAC_1726 | hisB | Imidazoleglycerol-phosphate dehydratase                                                                                               | 195.3 | 252   | 80.5  | 82.5  | 0  | 0.78 | 0.89 |
| NSCAC_1540 |      | conserved protein of unknown function                                                                                                 | 194.1 | 226.7 | 21.7  | 46.4  | 0  | 0.2  | 0.42 |
| NSCAC_1165 |      | conserved membrane protein of unknown function                                                                                        | 194.1 | 201.7 | 49.6  | 39.8  | 0  | 0.16 | 0.37 |
| NSCAC_0226 | carA | carbamoyl-phosphate synthase, small subunit                                                                                           | 193.9 | 175.7 | 17.5  | 24.7  | -1 | 0    | 0    |
| NSCAC_0479 | ureC | Urease alpha subunit                                                                                                                  | 193.8 | 609.8 | 6.9   | 78.6  | 1  | 0    | 0    |
| NSCAC_1298 |      | OmpA/MotB domain protein                                                                                                              | 193.7 | 217.8 | 66.9  | 43.7  | 0  | 0.25 | 0.47 |
| NSCAC_0402 | frr  | ribosome recycling factor                                                                                                             | 193.7 | 220.9 | 36.5  | 56.8  | 0  | 0.23 | 0.46 |
| NSCAC_0626 | frmB | S-formylglutathione hydrolase                                                                                                         | 193.3 | 191.5 | 12.7  | 29.2  | 0  | 0.02 | 0.07 |
| NSCAC_0801 | cysG | Siroheme synthase [Includes: Uroporphyrinogen-III C-methyltransferase ; Precorrin-2 dehydrogenase ; Sirohydrochlorin ferrochelataase] | 192.6 | 244   | 53    | 8.6   | 0  | 0.71 | 0.84 |
| NSCAC_1136 | guaD | Guanine deaminase                                                                                                                     | 191.7 | 178.2 | 59.7  | 41.1  | -1 | 0.06 | 0.17 |
| NSCAC_0723 |      | conserved protein of unknown function                                                                                                 | 190.8 | 137.1 | 9.5   | 24    | -1 | 0    | 0    |
| NSCAC_0171 | deaD | ATP-dependent RNA helicase DeaD                                                                                                       | 190.6 | 275.4 | 36.9  | 82.5  | 0  | 0.74 | 0.86 |
| NSCAC_1226 |      | putative Glycosyl transferase family 1                                                                                                | 190.3 | 256.9 | 13.8  | 6.9   | 0  | 1    | 1    |
| NSCAC_1009 | rplT | 50S ribosomal protein L20, also posttranslational autoregulator                                                                       | 190.3 | 272.7 | 50.3  | 29.1  | 0  | 0.59 | 0.77 |
| NSCAC_1604 | yajR | Inner membrane transport protein YajR                                                                                                 | 190.1 | 137.9 | 42.5  | 15.8  | -1 | 0    | 0    |
| NSCAC_1631 | ybaB | conserved hypothetical protein                                                                                                        | 189.3 | 368.3 | 53.4  | 120.7 | 1  | 0.02 | 0.09 |

|            |      |                                                                  |       |       |       |       |    |      |      |
|------------|------|------------------------------------------------------------------|-------|-------|-------|-------|----|------|------|
| NSCAC_1268 |      | Phosphoglycolate phosphatase                                     | 189.2 | 268.1 | 52.8  | 6.6   | 0  | 0.65 | 0.8  |
| NSCAC_0772 |      | Thiamine biosynthesis protein ThiS                               | 188.8 | 259.6 | 82.6  | 56.6  | 0  | 1    | 1    |
| NSCAC_1061 |      | protein of unknown function                                      | 188.8 | 225.5 | 106.4 | 17.5  | 0  | 0.59 | 0.77 |
| NSCAC_1209 | ccmB | heme exporter subunit ; membrane component of ABC superfamily    | 188.2 | 251.4 | 4.6   | 53.8  | 0  | 0.95 | 0.98 |
| NSCAC_0702 | ycgN | conserved hypothetical protein                                   | 188.1 | 299.3 | 45.8  | 85.8  | 0  | 0.52 | 0.72 |
| NSCAC_1411 | ftsZ | GTP-binding tubulin-like cell division protein                   | 187.5 | 338.1 | 45.6  | 64.9  | 0  | 0.14 | 0.34 |
| NSCAC_1155 |      | Amino acid peptide transporter                                   | 187.4 | 270.9 | 6.7   | 23.8  | 0  | 0.61 | 0.78 |
| NSCAC_1171 |      | Putative outer membrane chanel lipoprotein (modular protein)     | 187.3 | 380.3 | 48.4  | 33.3  | 1  | 0    | 0.02 |
| NSCAC_1434 |      | conserved protein of unknown function                            | 187.2 | 238.8 | 50.8  | 58.2  | 0  | 0.62 | 0.78 |
| NSCAC_1501 |      | conserved protein of unknown function                            | 186.5 | 287.3 | 56.8  | 122.4 | 0  | 0.5  | 0.71 |
| NSCAC_0392 | pdxJ | pyridoxine 5'-phosphate synthase                                 | 186   | 276.3 | 69.9  | 31    | 0  | 0.5  | 0.71 |
| NSCAC_0720 |      | conserved membrane protein of unknown function                   | 186   | 218.6 | 10.1  | 34    | 0  | 0.29 | 0.52 |
| NSCAC_1035 |      | conserved membrane protein of unknown function                   | 185.8 | 216.6 | 75.6  | 26.9  | 0  | 0.43 | 0.66 |
| NSCAC_0695 |      | putative Patatin-like phospholipase                              | 185.4 | 125.6 | 66.9  | 34.2  | -1 | 0    | 0.02 |
| NSCAC_0446 |      | Trehalase                                                        | 185.4 | 238.3 | 38.1  | 17.2  | 0  | 0.76 | 0.87 |
| NSCAC_1239 |      | Nitrilase/cyanide hydratase and apolipoprotein N-acyltransferase | 185.4 | 277.9 | 11.9  | 20.2  | 0  | 0.49 | 0.71 |
| NSCAC_1681 | yebC | conserved hypothetical protein                                   | 185.3 | 237   | 98    | 38.7  | 0  | 0.85 | 0.92 |
| NSCAC_1407 |      | conserved membrane protein of unknown function                   | 185   | 221.6 | 51.9  | 11.2  | 0  | 0.47 | 0.68 |
| NSCAC_1333 |      | putative Polysaccharide biosynthesis protein                     | 184.8 | 157.5 | 27.8  | 18.6  | -1 | 0.01 | 0.04 |
| NSCAC_0730 | cmoA | tRNA (cmo5U34)-methyltransferase                                 | 184.7 | 179.1 | 131.6 | 33.2  | 0  | 0.23 | 0.46 |
| NSCAC_1439 |      | conserved protein of unknown function                            | 184.4 | 230.8 | 53.1  | 64.7  | 0  | 0.62 | 0.78 |
| NSCAC_0384 | cysN | Sulfate adenylyltransferase, large subunit                       | 184.2 | 228.7 | 26.6  | 47.9  | 0  | 0.47 | 0.68 |
| NSCAC_1269 | trpE | Anthranilate synthase component I                                | 183   | 170.1 | 11.6  | 12.9  | -1 | 0.01 | 0.03 |
| NSCAC_1145 | qseB | Transcriptional regulatory protein QseB                          | 182.8 | 193.6 | 35.8  | 53.9  | 0  | 0.26 | 0.49 |
| NSCAC_1076 | asd  | Aspartate-semialdehyde dehydrogenase                             | 182.5 | 118.1 | 81.8  | 15.3  | -1 | 0    | 0    |
| NSCAC_1260 |      | FeS assembly SUF system protein SufT                             | 182.4 | 200.4 | 37.5  | 32.4  | 0  | 0.15 | 0.35 |
| NSCAC_0220 |      | 2-polyprenyl-6-methoxyphenol 4-hydroxylase                       | 182   | 153.2 | 11.1  | 21.5  | -1 | 0    | 0.01 |
| NSCAC_0167 |      | Type I secretion outer membrane protein, TolC family             | 182   | 580.5 | 27    | 55.5  | 1  | 0    | 0    |
| NSCAC_0326 |      | Preprotein translocase, YajC subunit                             | 181.9 | 266.5 | 24    | 72.4  | 0  | 0.62 | 0.79 |
| NSCAC_0059 | trkH | potassium transporter                                            | 181.6 | 266   | 29.2  | 15.9  | 0  | 0.46 | 0.67 |
| NSCAC_0703 |      | conserved exported protein of unknown function                   | 181.5 | 336.2 | 37.8  | 66.5  | 0  | 0.12 | 0.29 |

|            |      |                                                                                                                                       |       |       |       |       |    |      |      |
|------------|------|---------------------------------------------------------------------------------------------------------------------------------------|-------|-------|-------|-------|----|------|------|
| NSCAC_1350 | yqjG | S-transferase                                                                                                                         | 180.5 | 154.4 | 7.4   | 29.5  | -1 | 0    | 0.01 |
| NSCAC_1262 | sufS | selenocysteine lyase, PLP-dependent                                                                                                   | 180.5 | 128.2 | 45.7  | 19.1  | -1 | 0    | 0    |
| NSCAC_0796 | eno  | enolase                                                                                                                               | 180.1 | 179.3 | 39.3  | 23.8  | 0  | 0.02 | 0.09 |
| NSCAC_0711 |      | TonB-system energizer ExbB                                                                                                            | 179.9 | 217.1 | 18.6  | 18    | 0  | 0.34 | 0.58 |
| NSCAC_1170 |      | putative outer membrane channel lipoprotein                                                                                           | 179.7 | 324.4 | 20.2  | 7.9   | 0  | 0.01 | 0.03 |
| NSCAC_0157 | rplI | 50S ribosomal subunit protein L9                                                                                                      | 179.1 | 287.3 | 102.7 | 154.8 | 0  | 0.5  | 0.71 |
| NSCAC_0625 | frmA | alcohol dehydrogenase class III/glutathione-dependent formaldehyde dehydrogenase                                                      | 179.1 | 162.8 | 56.5  | 8.6   | -1 | 0.01 | 0.04 |
| NSCAC_0679 |      | conserved membrane protein of unknown function                                                                                        | 179   | 403.8 | 72    | 35.1  | 1  | 0    | 0.01 |
| NSCAC_1529 | ahcY | Adenosylhomocysteinase                                                                                                                | 178.8 | 233.4 | 20.7  | 16.9  | 0  | 0.74 | 0.86 |
| NSCAC_0381 |      | conserved membrane protein of unknown function                                                                                        | 178.6 | 121.5 | 16.7  | 4.2   | -1 | 0    | 0    |
| NSCAC_1552 | purH | fused IMP cyclohydrolase ; phosphoribosylaminoimidazolecarboxamide formyltransferase                                                  | 178.4 | 259.6 | 41.4  | 23.6  | 0  | 0.64 | 0.8  |
| NSCAC_1675 | tolR | Protein TolR                                                                                                                          | 178.2 | 223.6 | 74.8  | 33    | 0  | 0.77 | 0.88 |
| NSCAC_1473 | bipA | GTP-binding protein                                                                                                                   | 178.2 | 182.7 | 25    | 29.7  | 0  | 0.02 | 0.08 |
| NSCAC_1289 | pyrC | Dihydroorotase                                                                                                                        | 178   | 326.8 | 13.6  | 66.1  | 0  | 0.05 | 0.15 |
| NSCAC_0984 |      | putative FAD linked oxidase domain protein                                                                                            | 178   | 274.4 | 60.6  | 69.4  | 0  | 0.41 | 0.64 |
| NSCAC_0822 |      | conserved protein of unknown function                                                                                                 | 177.3 | 145.7 | 111.7 | 72.1  | -1 | 0.07 | 0.2  |
| NSCAC_1264 | sufC | component of SufBCD complex, ATP-binding component of ABC superfamily                                                                 | 177.2 | 140.7 | 30.6  | 50.2  | -1 | 0    | 0.01 |
| NSCAC_0776 |      | ATP-binding region ATPase domain protein                                                                                              | 177   | 435.9 | 24.4  | 64.4  | 1  | 0    | 0    |
| NSCAC_1531 | gloA | lactoylglutathione lyase                                                                                                              | 176.5 | 289   | 54.3  | 46.5  | 0  | 0.18 | 0.4  |
| NSCAC_1243 | hom  | Homoserine dehydrogenase                                                                                                              | 176.3 | 220.3 | 20.1  | 24.3  | 0  | 0.58 | 0.76 |
| NSCAC_1570 | murA | UDP-N-acetylglucosamine 1-carboxyvinyltransferase (Enoylpyruvate transferase) (UDP-N-acetylglucosamine enolpyruvyl transferase) (EPT) | 176.3 | 259.3 | 20.2  | 5.3   | 0  | 0.42 | 0.65 |
| NSCAC_1203 | ybbK | putative protease, membrane anchored                                                                                                  | 175.1 | 282.9 | 69.8  | 21.9  | 0  | 0.26 | 0.49 |
| NSCAC_1159 |      | Multidrug resistance protein                                                                                                          | 174.9 | 396.3 | 25.1  | 42.6  | 1  | 0    | 0    |
| NSCAC_0589 | cbbX | Protein CbbX                                                                                                                          | 174.1 | 103   | 26.3  | 16.6  | -1 | 0    | 0    |
| NSCAC_0552 | cysJ | Sulfite reductase [NADPH] flavoprotein, alpha subunit                                                                                 | 173.4 | 110   | 21.3  | 6.7   | -1 | 0    | 0    |
| NSCAC_1464 |      | conserved protein of unknown function                                                                                                 | 173.4 | 174.5 | 85.8  | 37.7  | 0  | 0.19 | 0.4  |
| NSCAC_0680 |      | 6-phosphogluconate dehydrogenase NAD-binding protein                                                                                  | 173   | 166.9 | 24.6  | 63.6  | -1 | 0.04 | 0.12 |
| NSCAC_1689 |      | conserved protein of unknown function                                                                                                 | 171.6 | 264.2 | 101.4 | 150.2 | 0  | 0.63 | 0.79 |

|            |      |                                                                                            |       |       |       |       |    |      |      |
|------------|------|--------------------------------------------------------------------------------------------|-------|-------|-------|-------|----|------|------|
| NSCAC_0503 |      | conserved membrane protein of unknown function                                             | 169.7 | 156.3 | 36.6  | 18.4  | -1 | 0.04 | 0.13 |
| NSCAC_1279 |      | protein of unknown function                                                                | 169   | 86.4  | 102.7 | 69.6  | -1 | 0.09 | 0.24 |
| NSCAC_1154 |      | putative Secreted protein containing PEP-CTERM bacterial domain protein                    | 168.9 | 405.8 | 11.9  | 64.4  | 1  | 0    | 0    |
| NSCAC_0983 |      | putative enzyme                                                                            | 168.9 | 401.8 | 64.9  | 139.9 | 1  | 0.01 | 0.05 |
| NSCAC_1505 | glnA | glutamine synthetase                                                                       | 168.9 | 269.5 | 52.3  | 17.7  | 0  | 0.22 | 0.44 |
| NSCAC_0727 | dfrA | putative dihydroflavonol-4-reductase                                                       | 168.6 | 268.1 | 36.1  | 29.2  | 0  | 0.15 | 0.35 |
| NSCAC_1568 | hisD | Histidinol dehydrogenase                                                                   | 168.5 | 216.9 | 42.1  | 4.3   | 0  | 0.78 | 0.89 |
| NSCAC_0358 | rplV | 50S ribosomal subunit protein L22                                                          | 168.3 | 212   | 20    | 164.8 | 0  | 0.72 | 0.85 |
| NSCAC_1664 |      | Binding-protein-dependent transport systems inner membrane component                       | 168.2 | 182.3 | 6.8   | 16.6  | 0  | 0.13 | 0.32 |
| NSCAC_1137 |      | Short-chain dehydrogenase/reductase SDR                                                    | 168.1 | 184.6 | 69.4  | 32    | 0  | 0.3  | 0.54 |
| NSCAC_0491 | mip  | Outer membrane protein MIP                                                                 | 168   | 184.8 | 35.1  | 126.7 | 0  | 0.36 | 0.6  |
| NSCAC_0453 |      | conserved protein of unknown function                                                      | 165.4 | 179.2 | 10.1  | 24.6  | 0  | 0.18 | 0.39 |
| NSCAC_1000 |      | putative O-antigen acetylase                                                               | 165.4 | 249.7 | 46.2  | 62.5  | 0  | 0.6  | 0.77 |
| NSCAC_1591 | aroC | Chorismate synthase                                                                        | 165.2 | 335.7 | 17.1  | 32.7  | 1  | 0.01 | 0.05 |
| NSCAC_0771 | thiG | thiamine biosynthesis protein, thiazole moiety                                             | 164.9 | 112   | 43.3  | 27.3  | -1 | 0    | 0    |
| NSCAC_0706 |      | conserved protein of unknown function                                                      | 164.4 | 214   | 11.3  | 5.6   | 0  | 0.76 | 0.87 |
| NSCAC_0584 | purB | adenylosuccinate lyase                                                                     | 164   | 243.8 | 53.6  | 23    | 0  | 0.45 | 0.67 |
| NSCAC_1340 |      | Exosortase 1                                                                               | 163.9 | 217.3 | 11.4  | 35.5  | 0  | 0.82 | 0.91 |
| NSCAC_1571 |      | BolA family protein                                                                        | 163.8 | 674.5 | 57.6  | 40.6  | 2  | 0    | 0    |
| NSCAC_0553 | cysI | Sulfite reductase [NADPH] hemoprotein, beta subunit                                        | 163.8 | 114.6 | 24.4  | 31.1  | -1 | 0    | 0    |
| NSCAC_0325 | tgt  | queuine tRNA-ribosyltransferase (tRNA-guanine transglycosylase) (Guanine insertion enzyme) | 163.4 | 116.6 | 24.6  | 22.2  | -1 | 0    | 0    |
| NSCAC_1754 |      | Uroporphyrinogen III synthase HEM4                                                         | 163.3 | 294.4 | 36.7  | 47.6  | 0  | 0.04 | 0.14 |
| NSCAC_0565 |      | conserved membrane protein of unknown function                                             | 161.1 | 131.1 | 27.8  | 17.5  | -1 | 0    | 0.02 |
| NSCAC_0452 | icd  | Isocitrate dehydrogenase                                                                   | 160.7 | 195.6 | 20.4  | 26.7  | 0  | 0.51 | 0.71 |
| NSCAC_1436 |      | ABC transporter related protein                                                            | 160.5 | 199   | 41.4  | 25.4  | 0  | 0.66 | 0.81 |
| NSCAC_1737 | yhdG | Uncharacterized amino acid permease YhdG                                                   | 160.4 | 205.8 | 13.7  | 23.8  | 0  | 0.72 | 0.85 |
| NSCAC_1339 |      | Sugar transferase, PEP-CTERM/EpsH1 system associated                                       | 160   | 200.6 | 61.2  | 53.7  | 0  | 0.71 | 0.85 |
| NSCAC_1521 | lolC | Lipoprotein-releasing system transmembrane protein LolC                                    | 159.5 | 128.7 | 56.7  | 17    | -1 | 0    | 0.02 |
| NSCAC_1484 | lipB | lipoyl-protein ligase                                                                      | 159.4 | 240.4 | 21    | 35.9  | 0  | 0.46 | 0.68 |
| NSCAC_0075 |      | exported protein of unknown function                                                       | 159.1 | 246.1 | 30.4  | 61.5  | 0  | 0.38 | 0.61 |



|            |       |                                                                                                       |       |       |       |       |    |      |      |
|------------|-------|-------------------------------------------------------------------------------------------------------|-------|-------|-------|-------|----|------|------|
| NSCAC_0608 | cusA  | copper/silver efflux system, membrane component                                                       | 159   | 211.7 | 26.3  | 13.8  | 0  | 0.96 | 0.98 |
| NSCAC_0270 | yqgE  | hypothetical protein                                                                                  | 158.9 | 183.4 | 42.8  | 26.1  | 0  | 0.25 | 0.48 |
| NSCAC_1075 |       | NADH:flavin oxidoreductase                                                                            | 158.9 | 136.9 | 35.4  | 14.6  | -1 | 0    | 0.01 |
| NSCAC_1504 |       | conserved protein of unknown function                                                                 | 158.8 | 163.9 | 75.7  | 24.3  | 0  | 0.18 | 0.4  |
| NSCAC_1508 |       | putative enzyme                                                                                       | 158.1 | 175   | 43.8  | 35.9  | 0  | 0.22 | 0.44 |
| NSCAC_0314 | yciI  | putative enzyme                                                                                       | 157.6 | 478   | 44.1  | 64.4  | 1  | 0    | 0    |
| NSCAC_1311 |       | protein of unknown function                                                                           | 156.6 | 88.2  | 47.9  | 21.3  | -1 | 0    | 0    |
| NSCAC_1492 |       | putative UDP-glucose/GDP-mannose dehydrogenase                                                        | 156.4 | 279.6 | 52.5  | 77.5  | 0  | 0.09 | 0.23 |
| NSCAC_1224 |       | protein of unknown function                                                                           | 156.4 | 223.7 | 43.1  | 56.6  | 0  | 0.75 | 0.87 |
| NSCAC_0232 | glmM  | phosphoglucosamine mutase                                                                             | 156   | 200.5 | 31.9  | 17.1  | 0  | 0.7  | 0.83 |
| NSCAC_1766 | glmU  | fused N-acetyl glucosamine-1-phosphate uridyltransferase ; glucosamine-1-phosphate acetyl transferase | 155.8 | 169.8 | 28.4  | 69.6  | 0  | 0.21 | 0.43 |
| NSCAC_1776 | parB  | putative chromosome-partitioning protein ParB                                                         | 155.8 | 326.4 | 33.4  | 9.2   | 1  | 0    | 0    |
| NSCAC_0256 |       | putative Acyltransferase 3                                                                            | 155.4 | 83.8  | 10.7  | 7.1   | -1 | 0    | 0    |
| NSCAC_0996 |       | Peptidase S9 prolyl oligopeptidase active site domain protein                                         | 155.1 | 160.3 | 17.4  | 14.9  | 0  | 0.02 | 0.08 |
| NSCAC_0781 |       | NAD(P)H dehydrogenase (quinone)                                                                       | 155   | 284.7 | 58.7  | 27.8  | 0  | 0.19 | 0.41 |
| NSCAC_0537 | ppiB  | peptidyl-prolyl cis-trans isomerase precursor (PPIase) (Rotamase)                                     | 154.9 | 320.1 | 103.2 | 139.9 | 1  | 0.09 | 0.24 |
| NSCAC_1752 |       | HemY domain protein                                                                                   | 154.8 | 269   | 39.7  | 89    | 0  | 0.12 | 0.29 |
| NSCAC_0094 | nadA  | Quinolinate synthase A                                                                                | 154.7 | 170.8 | 14    | 20.8  | 0  | 0.18 | 0.4  |
| NSCAC_0304 | cysQ  | 3'(2'),5'-bisphosphate nucleotidase CysQ                                                              | 154.1 | 187.2 | 33.7  | 13.1  | 0  | 0.41 | 0.64 |
| NSCAC_0821 |       | conserved protein of unknown function                                                                 | 153.6 | 169.6 | 70.7  | 35.8  | 0  | 0.42 | 0.65 |
| NSCAC_0127 |       | putative pterin-4-alpha-carbinolamine dehydratase                                                     | 153.4 | 316.6 | 119.6 | 141.3 | 1  | 0.48 | 0.69 |
| NSCAC_0664 | gloB  | Hydroxyacylglutathione hydrolase                                                                      | 153.2 | 159.5 | 28.1  | 40.5  | 0  | 0.06 | 0.18 |
| NSCAC_0252 | gcvPB | putative glycine dehydrogenase (decarboxylating) subunit 2                                            | 153.2 | 198   | 56.1  | 17.3  | 0  | 0.9  | 0.96 |
| NSCAC_0877 | gyrA  | DNA gyrase (type II topoisomerase), subunit A                                                         | 152.9 | 196.1 | 45.4  | 9.4   | 0  | 0.78 | 0.89 |
| NSCAC_0728 |       | Endonuclease/exonuclease/phosphatase                                                                  | 152.6 | 356.6 | 23.2  | 28.2  | 1  | 0    | 0    |
| NSCAC_0371 | rpmD  | 50S ribosomal subunit protein L30                                                                     | 152.3 | 237.7 | 85.6  | 83.5  | 0  | 0.54 | 0.73 |
| NSCAC_0763 |       | Fe-S protein, radical SAM family                                                                      | 152.2 | 229.9 | 26.9  | 51.9  | 0  | 0.43 | 0.66 |
| NSCAC_0276 |       | D-glycero-beta-D-manno-heptose-1,7-bisphosphate 7-phosphatase                                         | 152.1 | 211.8 | 50.9  | 49    | 0  | 0.94 | 0.97 |
| NSCAC_0048 | lgt   | phosphatidylglycerol-prolipoprotein diacylglyceryl transferase                                        | 152.1 | 140.9 | 17.2  | 45.9  | -1 | 0.08 | 0.21 |
| NSCAC_1743 | prs   | ribose-phosphate pyrophosphokinase (Phosphoribosyl pyrophosphate synthetase)                          | 151.9 | 281.6 | 21.9  | 70.1  | 0  | 0.06 | 0.18 |

|            |      |                                                                         |       |       |       |       |    |      |      |
|------------|------|-------------------------------------------------------------------------|-------|-------|-------|-------|----|------|------|
| NSCAC_1196 | purM | phosphoribosylaminoimidazole synthetase                                 | 151.5 | 160.7 | 12.7  | 12.4  | 0  | 0.08 | 0.23 |
| NSCAC_0315 |      | putative intracellular septation protein A                              | 151.3 | 193   | 37.8  | 8     | 0  | 0.69 | 0.83 |
| NSCAC_1248 | lepA | GTP-binding protein                                                     | 151.1 | 149.3 | 8.8   | 1.8   | 0  | 0.03 | 0.1  |
| NSCAC_1381 |      | protein of unknown function                                             | 151.1 | 224.7 | 31.7  | 21    | 0  | 0.41 | 0.64 |
| NSCAC_0778 |      | Ferredoxin 1                                                            | 150.6 | 94    | 19.9  | 34.5  | -1 | 0    | 0    |
| NSCAC_0391 | recO | DNA repair protein RecO                                                 | 150.5 | 183.9 | 23.3  | 35.2  | 0  | 0.41 | 0.64 |
| NSCAC_0719 | terZ | Tellurium resistance protein TerZ                                       | 150.3 | 186.3 | 35.4  | 86.2  | 0  | 0.6  | 0.77 |
| NSCAC_0449 |      | conserved protein of unknown function                                   | 150.2 | 289.5 | 52.8  | 36    | 1  | 0.01 | 0.06 |
| NSCAC_1122 | yfgB | putative Fe-S containing enzyme                                         | 149.8 | 86.5  | 11.2  | 21.3  | -1 | 0    | 0    |
| NSCAC_0701 |      | conserved protein of unknown function                                   | 149.6 | 279.9 | 46.4  | 114.9 | 0  | 0.09 | 0.24 |
| NSCAC_1270 | fsr  | fosmidomycin efflux system, member of the major facilitator superfamily | 149.4 | 262.9 | 16.2  | 11.2  | 0  | 0.03 | 0.1  |
| NSCAC_0846 |      | Binding-protein-dependent transport system protein                      | 149   | 124   | 20.9  | 3.4   | -1 | 0    | 0    |
| NSCAC_1024 | ppa  | Inorganic pyrophosphatase                                               | 148.4 | 205.8 | 35.3  | 18.3  | 0  | 0.79 | 0.89 |
| NSCAC_1648 | exbD | Biopolymer transport protein exbD2                                      | 148.1 | 157.6 | 103.9 | 76.8  | 0  | 0.48 | 0.69 |
| NSCAC_0419 | hprA | Glycerate dehydrogenase                                                 | 147.7 | 182.4 | 21.8  | 24.3  | 0  | 0.55 | 0.74 |
| NSCAC_1685 | copA | Copper-exporting P-type ATPase A                                        | 147.2 | 95.7  | 25.6  | 12.1  | -1 | 0    | 0    |
| NSCAC_1703 |      | Uncharacterized transporter HI_0895                                     | 146.6 | 183.7 | 12.2  | 16.2  | 0  | 0.5  | 0.71 |
| NSCAC_0753 | iscS | Cysteine desulfurase                                                    | 146.2 | 68.6  | 35.6  | 15.2  | -1 | 0    | 0    |
| NSCAC_0981 |      | conserved membrane protein of unknown function                          | 146.2 | 88    | 21.7  | 32.8  | -1 | 0    | 0    |
| NSCAC_1153 |      | Methyltransferase domain family                                         | 146.1 | 173.8 | 36.8  | 49.5  | 0  | 0.4  | 0.64 |
| NSCAC_0619 | metA | Homoserine O-succinyltransferase                                        | 146   | 199.1 | 17.8  | 17.9  | 0  | 0.94 | 0.97 |
| NSCAC_1244 | alaC | Aspartate aminotransferase                                              | 146   | 175.5 | 8     | 21.3  | 0  | 0.41 | 0.64 |
| NSCAC_0760 | traL | Protein TraL                                                            | 145.9 | 274.1 | 40.2  | 95    | 0  | 0.05 | 0.16 |
| NSCAC_1548 | aroQ | 3-dehydroquinate dehydratase                                            | 145.7 | 256.2 | 82.5  | 63.9  | 0  | 0.25 | 0.48 |
| NSCAC_1779 | gidA | glucose-inhibited cell-division protein                                 | 145.3 | 232.5 | 13.8  | 33.5  | 0  | 0.27 | 0.5  |
| NSCAC_0397 |      | thiamin-monophosphate kinase (modular protein)                          | 144.5 | 174.3 | 12.9  | 27.2  | 0  | 0.45 | 0.67 |
| NSCAC_0815 | acs  | acetyl-CoA synthetase                                                   | 144   | 199.1 | 30.4  | 30.9  | 0  | 0.81 | 0.9  |
| NSCAC_0707 |      | exported protein of unknown function                                    | 143.3 | 186.5 | 29.5  | 29.4  | 0  | 0.8  | 0.9  |
| NSCAC_0421 |      | conserved protein of unknown function                                   | 142.8 | 106.1 | 17.4  | 2.5   | -1 | 0    | 0    |
| NSCAC_1105 |      | Abortive infection bacteriophage resistance protein                     | 142.4 | 111.8 | 30.1  | 38.8  | -1 | 0.02 | 0.09 |
| NSCAC_0332 | ubiB | 2-octaprenylphenol hydroxylase                                          | 141.7 | 167.5 | 10    | 19.3  | 0  | 0.38 | 0.61 |

|            |      |                                                                                                    |       |       |      |       |    |      |      |
|------------|------|----------------------------------------------------------------------------------------------------|-------|-------|------|-------|----|------|------|
| NSCAC_0330 | mpl  | UDP-N-acetylmuramate:L-alanyl-gamma-D-glutamyl-me so-diaminopimelate ligase                        | 141.6 | 110.6 | 20   | 23.5  | -1 | 0    | 0.01 |
| NSCAC_1753 |      | conserved protein of unknown function                                                              | 141.4 | 235.4 | 34.5 | 138.8 | 0  | 0.4  | 0.64 |
| NSCAC_1483 | lipA | lipoate synthase                                                                                   | 141   | 221.4 | 22.2 | 7.5   | 0  | 0.27 | 0.5  |
| NSCAC_1067 | trpA | Tryptophan synthase alpha chain                                                                    | 141   | 167   | 48.1 | 55.5  | 0  | 0.55 | 0.74 |
| NSCAC_1296 | nrdB | ribonucleoside-diphosphate reductase, beta subunit                                                 | 140.4 | 160.3 | 53   | 48.1  | 0  | 0.45 | 0.67 |
| NSCAC_0858 |      | Glycosyl transferase, group 1                                                                      | 140.3 | 304.6 | 31.9 | 52.2  | 1  | 0    | 0    |
| NSCAC_0225 | hemB | Delta-aminolevulinic acid dehydratase                                                              | 140.3 | 100.1 | 15.7 | 9.3   | -1 | 0    | 0    |
| NSCAC_1102 | alaS | alanyl-tRNA synthetase                                                                             | 140.1 | 202.6 | 37.7 | 16.9  | 0  | 0.55 | 0.74 |
| NSCAC_1746 |      | Tetratricopeptide TPR_2 repeat protein                                                             | 139.9 | 321   | 43.3 | 146.6 | 1  | 0.01 | 0.04 |
| NSCAC_0773 |      | conserved membrane protein of unknown function                                                     | 139.9 | 207.6 | 21.2 | 4.7   | 0  | 0.61 | 0.78 |
| NSCAC_1471 |      | ATP-binding region ATPase domain protein (modular protein)                                         | 139.3 | 157.4 | 2.6  | 21.9  | 0  | 0.25 | 0.48 |
| NSCAC_1522 | lolD | outer membrane-specific lipoprotein transporter subunit ; ATP-binding component of ABC superfamily | 138.8 | 132.5 | 25.3 | 16.1  | -1 | 0.06 | 0.18 |
| NSCAC_1663 |      | Extracellular solute-binding protein family 5                                                      | 138.7 | 169.8 | 16.4 | 10.8  | 0  | 0.42 | 0.65 |
| NSCAC_1113 |      | Peptidase M23                                                                                      | 137.7 | 223.4 | 35.5 | 57.1  | 0  | 0.22 | 0.44 |
| NSCAC_0331 |      | putative aromatic acid decarboxylase                                                               | 136.6 | 212.9 | 33.3 | 37.6  | 0  | 0.32 | 0.55 |
| NSCAC_0993 |      | conserved protein of unknown function                                                              | 136.6 | 210.4 | 15.3 | 7.4   | 0  | 0.27 | 0.51 |
| NSCAC_0995 |      | conserved exported protein of unknown function                                                     | 136.3 | 282.7 | 38.7 | 26.6  | 1  | 0    | 0.02 |
| NSCAC_0937 |      | conserved protein of unknown function                                                              | 135.8 | 133.2 | 30.4 | 38.4  | 0  | 0.04 | 0.13 |
| NSCAC_1004 | metZ | O-succinylhomoserine sulphydrylase                                                                 | 135.8 | 152.5 | 39.1 | 6.6   | 0  | 0.29 | 0.52 |
| NSCAC_1733 | tatA | TatABCE protein translocation system subunit                                                       | 135.6 | 244.4 | 22.1 | 80.1  | 0  | 0.17 | 0.39 |
| NSCAC_0673 | metE | 5-methyltetrahydropteroyltriglutamate-homocysteine S-methyltransferase                             | 135.5 | 195.3 | 13.3 | 17.1  | 0  | 0.75 | 0.86 |
| NSCAC_1646 |      | TPR repeat-containing protein                                                                      | 135.5 | 142.7 | 27.6 | 53    | 0  | 0.15 | 0.35 |
| NSCAC_0536 | lpxH | UDP-2,3-diacylglucosamine pyrophosphatase                                                          | 135.5 | 155.3 | 19.2 | 18.1  | 0  | 0.26 | 0.48 |
| NSCAC_0142 |      | conserved protein of unknown function                                                              | 135.5 | 196.4 | 36.9 | 2.3   | 0  | 0.55 | 0.74 |
| NSCAC_0677 | ydaO | putative C32 tRNA thiolase                                                                         | 135.2 | 203.2 | 59.5 | 11.6  | 0  | 0.47 | 0.68 |
| NSCAC_0070 | aroB | 3-dehydroquinate synthase                                                                          | 135.2 | 156.8 | 33   | 12.6  | 0  | 0.36 | 0.59 |
| NSCAC_0336 | hslU | molecular chaperone and ATPase component of HslUV protease                                         | 134.4 | 209   | 61.5 | 38.8  | 0  | 0.44 | 0.66 |
| NSCAC_1406 | argJ | Arginine biosynthesis bifunctional protein ArgJ                                                    | 134.1 | 139.6 | 23.2 | 11.5  | 0  | 0.14 | 0.33 |
| NSCAC_0009 |      | Sporulation domain protein                                                                         | 133.6 | 135.1 | 91.7 | 50.6  | 0  | 0.33 | 0.56 |

|            |      |                                                                       |       |       |      |       |    |      |      |
|------------|------|-----------------------------------------------------------------------|-------|-------|------|-------|----|------|------|
| NSCAC_1575 | yrbF | toluene transporter subunit: ATP-binding component of ABC superfamily | 133.6 | 285.9 | 39.2 | 24.6  | 1  | 0    | 0    |
| NSCAC_1326 |      | putative Trypsin                                                      | 132.7 | 145.1 | 20.7 | 11.1  | 0  | 0.09 | 0.25 |
| NSCAC_0839 | mrp  | antiporter inner membrane protein                                     | 132.3 | 115.2 | 24.2 | 7.6   | -1 | 0    | 0.01 |
| NSCAC_1628 | hisZ | ATP phosphoribosyltransferase regulatory subunit                      | 132.1 | 146.2 | 15.9 | 24.5  | 0  | 0.12 | 0.3  |
| NSCAC_1038 | htpG | molecular chaperone HSP90 family                                      | 132.1 | 226.2 | 15   | 26.2  | 0  | 0.07 | 0.2  |
| NSCAC_0840 |      | Protein-tyrosine-phosphatase                                          | 131.8 | 186.9 | 58.6 | 30.9  | 0  | 0.69 | 0.83 |
| NSCAC_0743 | can1 | Carbonic anhydrase 1                                                  | 131.6 | 157.3 | 47.6 | 18    | 0  | 0.57 | 0.76 |
| NSCAC_1295 | nrdA | ribonucleoside diphosphate reductase, alpha subunit                   | 131.6 | 146.5 | 29.6 | 21.9  | 0  | 0.19 | 0.4  |
| NSCAC_0219 | visC | putative oxidoreductase with FAD/NAD(P)-binding domain                | 131.4 | 121.2 | 15.3 | 19.7  | -1 | 0    | 0.02 |
| NSCAC_0957 |      | putative Cell division protein ZipA                                   | 130.7 | 275.6 | 11.9 | 14.3  | 1  | 0    | 0    |
| NSCAC_1051 | ksgA | S-adenosylmethionine-6-N',N'-adenosyl (rRNA) dimethyltransferase      | 130.3 | 131.2 | 41.7 | 19.1  | 0  | 0.17 | 0.38 |
| NSCAC_1665 |      | Binding-protein-dependent transport systems inner membrane component  | 130.2 | 147.2 | 11   | 29.1  | 0  | 0.31 | 0.55 |
| NSCAC_1625 | hflX | putative GTPase                                                       | 129.7 | 205.3 | 23.4 | 34.1  | 0  | 0.2  | 0.42 |
| NSCAC_0140 | nsrR | DNA-binding transcriptional regulator                                 | 129.4 | 177   | 40.9 | 44.3  | 0  | 0.92 | 0.97 |
| NSCAC_0455 |      | conserved protein of unknown function                                 | 129.4 | 150.9 | 24.1 | 21.1  | 0  | 0.39 | 0.63 |
| NSCAC_0944 |      | glucuronosyltransferase                                               | 129.3 | 127.8 | 1.6  | 18.1  | 0  | 0.03 | 0.1  |
| NSCAC_0863 | wcaJ | putative UDP-sugar lipid carrier transferase                          | 129.2 | 227.7 | 13.5 | 18.5  | 0  | 0.05 | 0.15 |
| NSCAC_1404 | khk  | Ketohexokinase                                                        | 128.8 | 157.3 | 21.2 | 17.9  | 0  | 0.52 | 0.72 |
| NSCAC_0609 |      | Efflux transporter, RND family, MFP subunit                           | 128.6 | 196   | 38.9 | 55.6  | 0  | 0.45 | 0.67 |
| NSCAC_1740 | ychF | putative GTP-binding protein                                          | 128.5 | 197.2 | 19.1 | 51.4  | 0  | 0.58 | 0.76 |
| NSCAC_1342 |      | FemAB-related protein, PEP-CTERM system-associated                    | 127.7 | 173.9 | 45.2 | 63.4  | 0  | 0.95 | 0.98 |
| NSCAC_0222 |      | conserved protein of unknown function                                 | 127.6 | 215.3 | 44.3 | 110.4 | 0  | 0.33 | 0.56 |
| NSCAC_0410 | lpxA | UDP-N-acetylglucosamine acetyltransferase                             | 127.4 | 286.5 | 29.7 | 44.2  | 1  | 0.01 | 0.03 |
| NSCAC_1026 |      | conserved protein of unknown function                                 | 127.4 | 253.9 | 32.7 | 31.5  | 1  | 0.01 | 0.03 |
| NSCAC_0755 | ada  | O6-methylguanine-DNA methyltransferase                                | 127.1 | 221.7 | 53.4 | 55.7  | 0  | 0.16 | 0.36 |
| NSCAC_0106 | xerC | site-specific tyrosine recombinase                                    | 126.6 | 181.7 | 14.3 | 13.1  | 0  | 0.72 | 0.85 |
| NSCAC_1735 | tatC | TatABCE protein translocation system subunit                          | 126.5 | 251.1 | 17.3 | 39.8  | 1  | 0.03 | 0.1  |
| NSCAC_1324 | ftsY | cell division protein                                                 | 126.4 | 132.1 | 57.2 | 48.7  | 0  | 0.25 | 0.48 |
| NSCAC_0714 |      | Multidrug transporter                                                 | 126.1 | 115.4 | 18.7 | 38.5  | -1 | 0.09 | 0.24 |
| NSCAC_0794 | pyrG | CTP synthetase                                                        | 126   | 171.6 | 21.6 | 21.2  | 0  | 0.96 | 0.98 |
| NSCAC_0736 | pepA | aminopeptidase A, a cyteinyglycinase                                  | 126   | 244.3 | 45.4 | 47.2  | 1  | 0.02 | 0.08 |

|            |      |                                                                         |       |       |      |       |    |      |      |
|------------|------|-------------------------------------------------------------------------|-------|-------|------|-------|----|------|------|
| NSCAC_1680 | ruvC | component of RuvABC resolvasome, endonuclease                           | 125.8 | 111.9 | 46.3 | 16.9  | -1 | 0.03 | 0.1  |
| NSCAC_0195 | thiC | hydroxymethylpyrimidine moiety synthesis in thiamin biosynthesis        | 125.6 | 129.3 | 33   | 23    | 0  | 0.15 | 0.35 |
| NSCAC_0733 |      | UspA domain protein                                                     | 125.4 | 180.3 | 17.6 | 40.5  | 0  | 0.67 | 0.82 |
| NSCAC_1218 | coq  | 2-nonaprenyl-3-methyl-6-methoxy-1,4-benzoquinol hydroxylase             | 125.4 | 270.6 | 50.7 | 67.2  | 1  | 0.05 | 0.16 |
| NSCAC_1632 | recR | gap repair protein                                                      | 124.9 | 133   | 27.8 | 33.4  | 0  | 0.16 | 0.37 |
| NSCAC_0396 | ribE | riboflavin synthase beta chain                                          | 124.7 | 231.2 | 48.6 | 32.8  | 1  | 0.06 | 0.19 |
| NSCAC_0470 |      | exported protein of unknown function                                    | 123.4 | 177.4 | 69.6 | 148.8 | 0  | 0.87 | 0.93 |
| NSCAC_1020 |      | protein of unknown function                                             | 123.1 | 189.4 | 35.2 | 60.4  | 0  | 0.56 | 0.75 |
| NSCAC_1282 |      | Ribosomal-protein-alanine acetyltransferase                             | 122.9 | 125   | 24.2 | 14    | 0  | 0.04 | 0.14 |
| NSCAC_0560 |      | Hopanoid-associated phosphorylase                                       | 122.9 | 198.8 | 11.8 | 39.8  | 0  | 0.26 | 0.49 |
| NSCAC_0529 | rimM | 16S rRNA processing protein                                             | 122.9 | 158.4 | 79.7 | 36.2  | 0  | 0.98 | 0.99 |
| NSCAC_1232 |      | PpiC-type peptidyl-prolyl cis-trans isomerase                           | 122.9 | 182.8 | 4.9  | 91.9  | 0  | 0.73 | 0.86 |
| NSCAC_0597 |      | conserved membrane protein of unknown function                          | 122.7 | 144.2 | 35.1 | 21.6  | 0  | 0.41 | 0.64 |
| NSCAC_0864 |      | Inositol monophosphatase                                                | 122.4 | 125.6 | 34.7 | 10.9  | 0  | 0.1  | 0.25 |
| NSCAC_0408 |      | Outer membrane chaperone Skp (OmpH)                                     | 122.4 | 269   | 61.7 | 147.5 | 1  | 0.08 | 0.22 |
| NSCAC_0196 | purD | phosphoribosylglycinamide synthetase phosphoribosylamine-glycine ligase | 122.1 | 164.2 | 21.9 | 3.6   | 0  | 0.99 | 0.99 |
| NSCAC_0234 |      | Preprotein translocase, SecG subunit                                    | 122   | 196.5 | 68.2 | 47.8  | 0  | 0.43 | 0.66 |
| NSCAC_1421 | murF | UDP-N-acetylmuramoyl-tripeptide:D-alanyl-D-alanine ligase               | 121.9 | 146.2 | 3    | 12.3  | 0  | 0.36 | 0.6  |
| NSCAC_0922 |      | Colicin V production protein                                            | 121.3 | 167.1 | 41.4 | 17.5  | 0  | 0.95 | 0.98 |
| NSCAC_1181 |      | protein of unknown function                                             | 121   | 121   | 31.4 | 24.1  | 0  | 0.1  | 0.26 |
| NSCAC_0528 | rpsP | 30S ribosomal protein S16                                               | 121   | 186.3 | 71.7 | 19.9  | 0  | 0.49 | 0.7  |
| NSCAC_1398 | rne  | Ribonuclease E                                                          | 121   | 217.5 | 30.6 | 81    | 0  | 0.11 | 0.27 |
| NSCAC_0561 | shc  | Squalene--hopene cyclase                                                | 120.9 | 137.1 | 44.7 | 11.1  | 0  | 0.33 | 0.56 |
| NSCAC_0959 | queF | NADPH-dependent 7-cyano-7-deazaguanine reductase                        | 120.8 | 107.9 | 35.2 | 36.9  | -1 | 0.12 | 0.29 |
| NSCAC_1673 | tolB | periplasmic protein                                                     | 120.7 | 164.5 | 33.8 | 43.5  | 0  | 0.93 | 0.97 |
| NSCAC_0026 |      | conserved protein of unknown function                                   | 119.9 | 136.9 | 49.2 | 86.1  | 0  | 0.54 | 0.73 |
| NSCAC_1677 | ybgC | acyl-CoA thioesterase                                                   | 119.7 | 176.4 | 44.8 | 35    | 0  | 0.72 | 0.85 |
| NSCAC_1101 | lysC | Aspartate kinase                                                        | 119.6 | 210.7 | 50.8 | 27.5  | 0  | 0.1  | 0.26 |
| NSCAC_0151 |      | exported protein of unknown function                                    | 119.5 | 394.4 | 16.2 | 81.3  | 1  | 0    | 0    |
| NSCAC_1164 | def  | Peptide deformylase 1                                                   | 119.3 | 117.5 | 40.6 | 6.3   | 0  | 0.12 | 0.29 |

|            |      |                                                                                     |       |       |      |       |    |      |      |
|------------|------|-------------------------------------------------------------------------------------|-------|-------|------|-------|----|------|------|
| NSCAC_1545 | cutA | Divalent-cation tolerance protein CutA                                              | 119.1 | 138.3 | 76.1 | 60.1  | 0  | 0.49 | 0.71 |
| NSCAC_0857 |      | protein of unknown function                                                         | 118.5 | 142.8 | 33   | 64.1  | 0  | 0.5  | 0.71 |
| NSCAC_1335 |      | Glycosyl transferase, group 1                                                       | 118.5 | 206.5 | 9.4  | 38.4  | 0  | 0.16 | 0.36 |
| NSCAC_1185 | smpB | trans-translation protein                                                           | 118.4 | 110.7 | 7.7  | 16.9  | -1 | 0.03 | 0.1  |
| NSCAC_1402 | pfp  | Phosphofructokinase                                                                 | 118.3 | 127.7 | 21.2 | 34.7  | 0  | 0.15 | 0.35 |
| NSCAC_0019 |      | conserved protein of unknown function                                               | 118.3 | 167.1 | 9    | 36    | 0  | 0.8  | 0.9  |
| NSCAC_0599 |      | Cold-shock protein DNA-binding protein (fragment)                                   | 118.3 | 196   | 96.8 | 108.4 | 0  | 0.65 | 0.8  |
| NSCAC_0324 | pyrF | orotidine-5'-phosphate decarboxylase                                                | 118.1 | 92    | 39.6 | 12.5  | -1 | 0.01 | 0.06 |
| NSCAC_0456 |      | NADPH-dependent FMN reductase                                                       | 118.1 | 167.2 | 31.4 | 32.4  | 0  | 0.82 | 0.9  |
| NSCAC_0361 | rpmC | 50S ribosomal subunit protein L29                                                   | 117.2 | 131.3 | 83.4 | 116   | 0  | 0.6  | 0.77 |
| NSCAC_1686 |      | Heavy metal transport/detoxification protein                                        | 117.2 | 150.8 | 35.5 | 93.1  | 0  | 0.81 | 0.9  |
| NSCAC_1348 |      | PEP-CTERM system TPR-repeat lipoprotein                                             | 116.9 | 179.1 | 31.7 | 79    | 0  | 0.53 | 0.73 |
| NSCAC_1577 | kdsD | D-arabinose 5-phosphate isomerase                                                   | 116.8 | 120.1 | 4.9  | 8.5   | 0  | 0.08 | 0.23 |
| NSCAC_0021 | folB | bifunctional dihydroneopterin aldolase ; dihydroneopterin triphosphate 2'-epimerase | 116.5 | 110.2 | 65.7 | 43.8  | 0  | 0.24 | 0.46 |
| NSCAC_1780 | trmE | GTPase                                                                              | 116.4 | 188.4 | 36.7 | 16.3  | 0  | 0.2  | 0.42 |
| NSCAC_1299 |      | conserved membrane protein of unknown function                                      | 116   | 140.4 | 33.1 | 32.1  | 0  | 0.6  | 0.77 |
| NSCAC_0577 | truB | tRNA pseudouridine synthase                                                         | 115.5 | 202.5 | 38.7 | 23.5  | 0  | 0.06 | 0.19 |
| NSCAC_1476 | sucD | Succinyl-CoA ligase, subunit alpha                                                  | 115.2 | 138.5 | 26.6 | 28.5  | 0  | 0.56 | 0.75 |
| NSCAC_0929 |      | Malto-oligosyltrehalose synthase                                                    | 115.1 | 161.8 | 4    | 32.7  | 0  | 0.86 | 0.93 |
| NSCAC_1586 |      | PTS system fructose subfamily IIA component                                         | 115.1 | 218.1 | 24   | 73.6  | 0  | 0.04 | 0.13 |
| NSCAC_0571 | dapD | 2,3,4,5-tetrahydropyridine-2,6-dicarboxylate N-succinyltransferase                  | 115   | 199.6 | 46.8 | 53.7  | 0  | 0.17 | 0.38 |
| NSCAC_1468 |      | protein of unknown function                                                         | 115   | 34.7  | 77.3 | 23.3  | -2 | 0    | 0    |
| NSCAC_1336 |      | Glycosyl transferase group 1                                                        | 114.7 | 192.2 | 26.9 | 7.7   | 0  | 0.1  | 0.26 |
| NSCAC_0060 | rpmE | 50S ribosomal subunit protein L31                                                   | 114.7 | 248.3 | 77.1 | 75.8  | 1  | 0.11 | 0.28 |
| NSCAC_0437 | prfC | peptide chain release factor RF-3                                                   | 114.3 | 182.6 | 26.5 | 22.7  | 0  | 0.31 | 0.54 |
| NSCAC_0146 |      | Type II secretion system protein                                                    | 114   | 167.3 | 59   | 16.8  | 0  | 0.59 | 0.77 |
| NSCAC_1242 | thrC | threonine synthase                                                                  | 114   | 210.9 | 20.7 | 24.3  | 0  | 0.05 | 0.17 |
| NSCAC_0856 |      | protein of unknown function                                                         | 113.8 | 172.7 | 24.2 | 35    | 0  | 0.41 | 0.64 |
| NSCAC_1520 | rpiA | ribose 5-phosphate isomerase A                                                      | 113.2 | 121.3 | 47.5 | 23.2  | 0  | 0.26 | 0.49 |
| NSCAC_0770 | cysZ | Protein CysZ homolog                                                                | 113.1 | 121   | 15.3 | 25.3  | 0  | 0.23 | 0.45 |

|            |      |                                                                                                   |       |       |      |      |    |      |      |
|------------|------|---------------------------------------------------------------------------------------------------|-------|-------|------|------|----|------|------|
| NSCAC_0530 | trmD | tRNA (guanine-1-)-methyltransferase                                                               | 112.8 | 190.5 | 55.9 | 32.9 | 0  | 0.29 | 0.52 |
| NSCAC_0548 |      | protein of unknown function                                                                       | 112.7 | 248.9 | 58.4 | 56.1 | 1  | 0.01 | 0.05 |
| NSCAC_0442 |      | conserved protein of unknown function                                                             | 112.3 | 98.8  | 9.9  | 21.8 | -1 | 0    | 0.02 |
| NSCAC_1480 | efp  | elongation factor P                                                                               | 112.3 | 105.7 | 29.8 | 19.5 | -1 | 0.02 | 0.08 |
| NSCAC_0872 | nhaA | Na(+)/H(+) antiporter NhaA                                                                        | 112.1 | 109.5 | 17   | 16.7 | 0  | 0.03 | 0.12 |
| NSCAC_1025 |      | conserved protein of unknown function                                                             | 112   | 125.8 | 15.7 | 12   | 0  | 0.24 | 0.47 |
| NSCAC_0836 | rsxA | putative inner membrane subunit of an electron transport system                                   | 111.8 | 96.8  | 59.5 | 20.3 | -1 | 0.14 | 0.33 |
| NSCAC_0362 | rpsQ | 30S ribosomal subunit protein S17                                                                 | 111.8 | 68.5  | 44.4 | 21.2 | -1 | 0    | 0    |
| NSCAC_0768 |      | Alkyl hydroperoxide reductase/ Thiol specific antioxidant/ Mal allergen                           | 111.3 | 136.6 | 74.2 | 45.6 | 0  | 0.84 | 0.92 |
| NSCAC_0390 | lysS | lysine tRNA synthetase, constitutive                                                              | 111.2 | 136.4 | 20.7 | 27.8 | 0  | 0.5  | 0.71 |
| NSCAC_0708 |      | Oxidoreductase FAD/NAD(P)-binding domain protein                                                  | 111.2 | 103.3 | 14.6 | 8.8  | -1 | 0.02 | 0.08 |
| NSCAC_1659 |      | exported protein of unknown function                                                              | 111   | 100.4 | 23.5 | 11.6 | -1 | 0.02 | 0.08 |
| NSCAC_1403 | adk  | Adenylate kinase                                                                                  | 110.9 | 200.9 | 41.3 | 60.5 | 0  | 0.1  | 0.26 |
| NSCAC_0109 |      | General secretion pathway protein J                                                               | 110.7 | 126   | 71.9 | 6.2  | 0  | 0.58 | 0.77 |
| NSCAC_0208 | dapB | 4-hydroxy-tetrahydrodipicolinate reductase                                                        | 110.3 | 196.5 | 23.8 | 7.9  | 0  | 0.04 | 0.13 |
| NSCAC_1074 |      | protein of unknown function                                                                       | 110.3 | 123.1 | 8    | 6.5  | 0  | 0.19 | 0.41 |
| NSCAC_0027 | dnaG | DNA primase                                                                                       | 109.9 | 198.1 | 18.7 | 33.5 | 0  | 0.03 | 0.1  |
| NSCAC_1489 | mltB | Membrane-bound lytic murein transglycosylase B                                                    | 109.9 | 229.4 | 26.2 | 35.7 | 1  | 0    | 0.01 |
| NSCAC_0058 | Int  | Apolipoprotein N-acyltransferase                                                                  | 109.9 | 192.2 | 22.3 | 19.5 | 0  | 0.16 | 0.36 |
| NSCAC_0825 |      | conserved protein of unknown function                                                             | 109.8 | 33.3  | 63.5 | 17.7 | -2 | 0    | 0    |
| NSCAC_0504 |      | ABC-2 transporter                                                                                 | 109.8 | 93.1  | 19.4 | 6.2  | -1 | 0.01 | 0.06 |
| NSCAC_1132 | panB | 3-methyl-2-oxobutanoate hydroxymethyltransferase                                                  | 109.5 | 161.4 | 14.9 | 20.3 | 0  | 0.54 | 0.73 |
| NSCAC_0985 |      | Peptidase S8 and S53 subtilisin kexin sedolisin                                                   | 109.4 | 231.3 | 12.5 | 9.1  | 1  | 0    | 0    |
| NSCAC_1709 | obgE | GTPase Obg                                                                                        | 109.3 | 329.6 | 28.7 | 43.7 | 1  | 0    | 0    |
| NSCAC_1758 | yciA | Acyl-CoA thioester hydrolase YciA                                                                 | 109.3 | 169.6 | 35.9 | 10.2 | 0  | 0.33 | 0.57 |
| NSCAC_0764 |      | conserved protein of unknown function                                                             | 109.2 | 149.9 | 20.7 | 8.5  | 0  | 0.91 | 0.96 |
| NSCAC_1361 | rppH | RNA pyrophosphohydrolase                                                                          | 109.1 | 136.5 | 7.1  | 55.8 | 0  | 0.65 | 0.81 |
| NSCAC_1227 |      | membrane protein of unknown function                                                              | 109   | 109.3 | 39.9 | 12.9 | 0  | 0.18 | 0.4  |
| NSCAC_1408 | secA | preprotein translocase subunit, ATPase                                                            | 108.8 | 214.4 | 40.1 | 47.8 | 1  | 0.02 | 0.08 |
| NSCAC_1455 | spoT | bifunctional (p)ppGpp synthetase II and guanosine-3',5'-bis pyrophosphate 3'-pyrophosphohydrolase | 108.5 | 235.7 | 12.7 | 17.6 | 1  | 0    | 0.02 |

|            |      |                                                               |       |       |      |       |    |      |      |
|------------|------|---------------------------------------------------------------|-------|-------|------|-------|----|------|------|
| NSCAC_0718 |      | Acyltransferase 3                                             | 108.4 | 156.9 | 25   | 30.1  | 0  | 0.61 | 0.78 |
| NSCAC_1263 |      | Iron-regulated ABC transporter permease protein SufD          | 108.3 | 117.9 | 16.8 | 25.2  | 0  | 0.12 | 0.29 |
| NSCAC_1300 |      | putative metal transport system ATP-binding protein CT 416    | 108.2 | 92.9  | 26.2 | 9.7   | -1 | 0.02 | 0.08 |
| NSCAC_0948 |      | putative Phosphate-selective porin O and P                    | 108.1 | 165   | 10.5 | 24.4  | 0  | 0.49 | 0.7  |
| NSCAC_1618 |      | NAD-dependent epimerase/dehydratase                           | 108.1 | 144.3 | 9.9  | 16.7  | 0  | 0.86 | 0.93 |
| NSCAC_0228 | greA | transcription elongation factor                               | 108   | 89.1  | 63.3 | 85.6  | -1 | 0.22 | 0.45 |
| NSCAC_0807 |      | FAD linked oxidase domain protein                             | 107.3 | 107.8 | 20.2 | 19.1  | 0  | 0.08 | 0.23 |
| NSCAC_0198 | tsaC | Threonylcarbamoyl-AMP synthase                                | 107.3 | 166.8 | 41.7 | 63.5  | 0  | 0.51 | 0.72 |
| NSCAC_0973 | fabB | 3-oxoacyl-[acyl-carrier-protein] synthase I                   | 107.2 | 133.5 | 22.1 | 13.9  | 0  | 0.6  | 0.77 |
| NSCAC_1191 | yfjB | NAD kinase                                                    | 107.2 | 123.6 | 11.3 | 16.4  | 0  | 0.29 | 0.52 |
| NSCAC_1198 | dcd  | deoxycytidine triphosphate deaminase                          | 107.2 | 221.4 | 30.3 | 53.5  | 1  | 0.01 | 0.04 |
| NSCAC_1470 | pilR | Type 4 fimbriae expression regulatory protein PilR            | 107   | 78.9  | 26.1 | 18.9  | -1 | 0    | 0.02 |
| NSCAC_1589 |      | conserved membrane protein of unknown function                | 107   | 221.5 | 56   | 62.5  | 1  | 0.21 | 0.43 |
| NSCAC_1551 | prmA | methylase for 50S ribosomal subunit protein L11               | 107   | 169.2 | 18.1 | 22.6  | 0  | 0.27 | 0.5  |
| NSCAC_1560 | trpS | Tryptophan--tRNA ligase                                       | 106.9 | 181.8 | 41.2 | 34.2  | 0  | 0.21 | 0.44 |
| NSCAC_1334 |      | Capsular polysaccharide biosynthesis protein CapK             | 106.8 | 172.6 | 34.8 | 15.7  | 0  | 0.23 | 0.46 |
| NSCAC_0275 | glyS | glycine tRNA synthetase, beta subunit                         | 106.5 | 143.9 | 20.8 | 11.4  | 0  | 0.95 | 0.98 |
| NSCAC_1116 | gecH | glycine cleavage complex lipoylprotein                        | 106.3 | 179.6 | 47   | 105.1 | 0  | 0.43 | 0.66 |
| NSCAC_0128 |      | Membrane-bound metal-dependent hydrolase                      | 106.2 | 140.8 | 30.2 | 25.9  | 0  | 0.92 | 0.97 |
| NSCAC_1293 |      | Amino acid-binding ACT domain protein                         | 105.5 | 169   | 10.9 | 35.6  | 0  | 0.28 | 0.51 |
| NSCAC_1082 |      | conserved exported protein of unknown function                | 105.4 | 265.6 | 34.5 | 66.9  | 1  | 0    | 0    |
| NSCAC_0119 |      | ABC-2 type transporter                                        | 105   | 187.8 | 11.2 | 31.8  | 0  | 0.08 | 0.21 |
| NSCAC_1676 | tolQ | membrane spanning protein in TolA-TolQ-TolR complex           | 104.5 | 139.4 | 32.6 | 26.4  | 0  | 0.92 | 0.97 |
| NSCAC_0591 |      | conserved protein of unknown function                         | 104.4 | 160.3 | 34.6 | 41.8  | 0  | 0.44 | 0.66 |
| NSCAC_1007 | pheT | phenylalanine tRNA synthetase, beta subunit                   | 104.4 | 158.2 | 26.1 | 8.6   | 0  | 0.42 | 0.65 |
| NSCAC_0014 |      | Rhodanese domain protein (fragment)                           | 104.1 | 213.4 | 70.6 | 63.9  | 1  | 0.11 | 0.27 |
| NSCAC_0735 |      | DNA polymerase III chi subunit HolC                           | 104.1 | 267.2 | 35.9 | 20.1  | 1  | 0    | 0    |
| NSCAC_0018 |      | conserved protein of unknown function                         | 103.9 | 109.8 | 18.4 | 63.6  | 0  | 0.25 | 0.47 |
| NSCAC_0061 |      | Malate dehydrogenase (Oxaloacetate-decarboxylating) (NADP(+)) | 103.7 | 228.3 | 15.1 | 15.8  | 1  | 0    | 0    |
| NSCAC_1377 |      | putative Beta-lactamase                                       | 103.5 | 52.5  | 37.7 | 5.5   | -1 | 0    | 0    |
| NSCAC_1003 |      | Uracil-xanthine permease                                      | 103.4 | 299.9 | 24.1 | 10.5  | 1  | 0    | 0    |



|            |      |                                                                                                                 |       |       |      |      |    |      |      |
|------------|------|-----------------------------------------------------------------------------------------------------------------|-------|-------|------|------|----|------|------|
| NSCAC_1749 | minC | putative septum site-determining protein MinC                                                                   | 103.4 | 133.4 | 16.8 | 9.3  | 0  | 0.74 | 0.86 |
| NSCAC_0131 | leuC | 3-isopropylmalate dehydratase, large subunit                                                                    | 103.3 | 103.8 | 19.4 | 6.4  | 0  | 0.04 | 0.14 |
| NSCAC_0943 |      | conserved protein of unknown function                                                                           | 103.3 | 51.9  | 55.4 | 12.7 | -1 | 0    | 0.01 |
| NSCAC_1561 |      | Peptidase M50                                                                                                   | 103.1 | 213.7 | 1.7  | 25.4 | 1  | 0.01 | 0.04 |
| NSCAC_1629 | purA | adenylosuccinate synthetase                                                                                     | 102.7 | 103.7 | 27   | 24.2 | 0  | 0.07 | 0.21 |
| NSCAC_0678 | msrA | methionine sulfoxide reductase A                                                                                | 102.6 | 170.9 | 7.9  | 49   | 0  | 0.22 | 0.45 |
| NSCAC_1622 | rho  | transcription termination factor                                                                                | 102.3 | 148.9 | 42.9 | 24.1 | 0  | 0.62 | 0.78 |
| NSCAC_0016 | secB | protein export chaperone                                                                                        | 101.9 | 213.2 | 52.1 | 62   | 1  | 0.09 | 0.24 |
| NSCAC_0409 | fabZ | (3R)-hydroxymyristol acyl carrier protein dehydratase                                                           | 101.8 | 175.4 | 74.9 | 35.6 | 0  | 0.37 | 0.6  |
| NSCAC_1419 | murD | UDP-N-acetylmuramoyl-L-alanine:D-glutamate ligase                                                               | 101.6 | 175.2 | 11.5 | 29.7 | 0  | 0.16 | 0.37 |
| NSCAC_1323 |      | Peptidase M16 domain protein                                                                                    | 101.2 | 168   | 34.3 | 27.4 | 0  | 0.17 | 0.38 |
| NSCAC_0203 |      | DNA polymerase III epsilon subunit (modular protein)                                                            | 101.1 | 194.2 | 30.4 | 76.6 | 0  | 0.07 | 0.21 |
| NSCAC_1653 | thiE | Thiamine-phosphate synthase                                                                                     | 100.5 | 152.5 | 19.3 | 14.5 | 0  | 0.47 | 0.68 |
| NSCAC_1202 |      | Glyoxalase/bleomycin resistance protein/dioxygenase                                                             | 100.5 | 94.6  | 49.1 | 52   | -1 | 0.22 | 0.45 |
| NSCAC_0854 |      | conserved membrane protein of unknown function                                                                  | 100.4 | 147.8 | 32.2 | 50.9 | 0  | 0.66 | 0.81 |
| NSCAC_1572 |      | Sulfate transporter / antisigma-factor antagonist STAS                                                          | 100.1 | 129.8 | 98.3 | 54.5 | 0  | 0.99 | 0.99 |
| NSCAC_1588 | phbI | Phosphoenolpyruvate-protein phosphotransferase                                                                  | 99.6  | 186.5 | 31.7 | 19.7 | 0  | 0.05 | 0.15 |
| NSCAC_0056 | ybeX | putative protein involved in divalent ion export                                                                | 99.6  | 186.8 | 28.6 | 40.9 | 0  | 0.04 | 0.12 |
| NSCAC_1678 | ruvB | holliday junction helicase, subunit B                                                                           | 98.9  | 119.1 | 2.9  | 13.9 | 0  | 0.47 | 0.68 |
| NSCAC_0334 | ubiE | bifunctional 2-octaprenyl-6-methoxy-1,4-benzoquinone methylase and S-adenosylmethionine:2-DMK methyltransferase | 98.8  | 188.6 | 17.5 | 17.2 | 0  | 0.07 | 0.21 |
| NSCAC_0566 | glcD | glycolate oxidase subunit, FAD-linked                                                                           | 98.8  | 104   | 37.9 | 16.7 | 0  | 0.22 | 0.44 |
| NSCAC_1782 | rnpA | Ribonuclease P protein component                                                                                | 98.6  | 86.8  | 40.6 | 37.7 | -1 | 0.1  | 0.26 |
| NSCAC_1010 | rpmI | 50S ribosomal subunit protein L35                                                                               | 98.2  | 73.4  | 61.6 | 30.7 | -1 | 0.11 | 0.27 |
| NSCAC_0156 | rpsR | 30S ribosomal protein S18                                                                                       | 98.1  | 304.5 | 55.1 | 40.2 | 1  | 0    | 0    |
| NSCAC_1682 | ilvE | Branched-chain-amino-acid aminotransferase                                                                      | 98    | 120   | 67.3 | 3.5  | 0  | 0.85 | 0.92 |
| NSCAC_0499 |      | conserved protein of unknown function                                                                           | 97.9  | 60.9  | 43.6 | 7.7  | -1 | 0    | 0.01 |
| NSCAC_0540 | folD | bifunctional 5,10-methylene-tetrahydrofolate dehydrogenase and 5,10-methylene-tetrahydrofolate cyclohydrolase   | 97.8  | 78.1  | 27.8 | 7.8  | -1 | 0.01 | 0.04 |
| NSCAC_1671 |      | Tol-pal system protein YbgF                                                                                     | 97.6  | 190.3 | 41.1 | 85.1 | 1  | 0.1  | 0.26 |
| NSCAC_0790 | glcE | glycolate oxidase FAD binding subunit                                                                           | 97.5  | 61.6  | 9    | 8.1  | -1 | 0    | 0    |
| NSCAC_0139 |      | conserved membrane protein of unknown function, cytochrome oxidase                                              | 97.1  | 97.1  | 17.3 | 28.6 | 0  | 0.14 | 0.33 |

|            |      |                                                                       |      |       |      |      |    |      |      |
|------------|------|-----------------------------------------------------------------------|------|-------|------|------|----|------|------|
|            |      | associated                                                            |      |       |      |      |    |      |      |
| NSCAC_1290 | purC | phosphoribosylaminoimidazole-succinocarboxamide synthase              | 96.6 | 118.5 | 36.1 | 58.7 | 0  | 0.67 | 0.82 |
| NSCAC_1644 |      | putative TonB-dependent receptor                                      | 96.6 | 123   | 11.6 | 15.2 | 0  | 0.68 | 0.82 |
| NSCAC_0780 | yfgD | putative oxidoreductase                                               | 96.5 | 164.7 | 82.5 | 51.4 | 0  | 0.64 | 0.8  |
| NSCAC_0882 | tyrA | Prephenate dehydrogenase                                              | 96.5 | 132.1 | 16.5 | 13.5 | 0  | 0.93 | 0.97 |
| NSCAC_0671 |      | Isoprenylcysteine carboxyl methyltransferase family protein           | 96.4 | 116.1 | 23.4 | 8.7  | 0  | 0.49 | 0.71 |
| NSCAC_0085 | gltX | glutamyl-tRNA synthetase                                              | 96.2 | 139.5 | 22.1 | 23.5 | 0  | 0.65 | 0.8  |
| NSCAC_0299 |      | membrane protein of unknown function                                  | 96.1 | 135.5 | 11.2 | 11.4 | 0  | 0.76 | 0.87 |
| NSCAC_1410 | lpxC | UDP-3-O-acyl N-acetylglucosamine deacetylase                          | 96.1 | 284.8 | 35   | 45.8 | 1  | 0    | 0    |
| NSCAC_1490 | gatC | Aspartyl/glutamyl-tRNA(Asn/Gln) amidotransferase subunit C            | 96   | 204.6 | 63.8 | 56.3 | 1  | 0.07 | 0.2  |
| NSCAC_0779 |      | conserved protein of unknown function                                 | 95.9 | 89.7  | 34.2 | 26.3 | -1 | 0.07 | 0.21 |
| NSCAC_1338 | wecB | UDP-N-acetylglucosamine 2-epimerase                                   | 95.9 | 198.1 | 19.7 | 13.5 | 1  | 0    | 0.01 |
| NSCAC_1090 |      | putative [NiFe]-hydrogenase, membrane subunit HyfB                    | 95.8 | 149.8 | 19.5 | 22.6 | 0  | 0.51 | 0.71 |
| NSCAC_1693 |      | conserved membrane protein of unknown function                        | 95.4 | 125.8 | 43.9 | 6.3  | 0  | 0.87 | 0.93 |
| NSCAC_1087 |      | putative [NiFe]-hydrogenase, membrane subunit HyfF                    | 94.8 | 139.2 | 19.9 | 5.8  | 0  | 0.74 | 0.86 |
| NSCAC_1569 | hisG | ATP phosphoribosyltransferase                                         | 94.8 | 161.2 | 16.3 | 15.3 | 0  | 0.2  | 0.42 |
| NSCAC_1197 | purN | phosphoribosylglycinamide formyltransferase 1                         | 94.5 | 148.9 | 16.4 | 31   | 0  | 0.46 | 0.67 |
| NSCAC_1701 |      | conserved protein of unknown function                                 | 94.5 | 135   | 33.1 | 44.7 | 0  | 0.8  | 0.9  |
| NSCAC_0994 | gshA | Glutamate-cysteine ligase                                             | 94.3 | 96.8  | 8.7  | 10.8 | 0  | 0.08 | 0.23 |
| NSCAC_0792 | accA | acetyl-CoA carboxylase, carboxytransferase, alpha subunit             | 94   | 114.6 | 14.6 | 12   | 0  | 0.46 | 0.68 |
| NSCAC_1030 | icmt | Isoprenylcysteine carboxyl methyltransferase                          | 93.7 | 104.5 | 37.6 | 21.6 | 0  | 0.37 | 0.6  |
| NSCAC_0797 | ftsB | cell division protein                                                 | 93.7 | 108.1 | 28.3 | 75.2 | 0  | 0.54 | 0.73 |
| NSCAC_1120 | hisS | histidyl tRNA synthetase                                              | 93.6 | 108   | 13.8 | 11.1 | 0  | 0.29 | 0.52 |
| NSCAC_1748 | prfA | peptide chain release factor RF-1                                     | 93.6 | 143.2 | 33.7 | 57.5 | 0  | 0.58 | 0.76 |
| NSCAC_0663 | lpxA | Acyl-[acyl-carrier-protein]-UDP-N-acetylglucosamine O-acyltransferase | 93.6 | 188.2 | 18.2 | 58.4 | 1  | 0.04 | 0.13 |
| NSCAC_1273 | trpC | Indole-3-glycerol phosphate synthase                                  | 93.4 | 133.3 | 35.9 | 46.3 | 0  | 0.77 | 0.88 |
| NSCAC_1452 | ubiA | p-hydroxybenzoate octaprenyltransferase                               | 93.4 | 140.9 | 1.7  | 4.5  | 0  | 0.45 | 0.67 |
| NSCAC_0274 | glyQ | glycyl-tRNA synthetase, alpha chain                                   | 93.4 | 178.2 | 9.2  | 6.7  | 0  | 0.04 | 0.13 |
| NSCAC_0291 | yjeE | ATPase with strong ADP affinity                                       | 93.4 | 103.1 | 46.9 | 18.1 | 0  | 0.43 | 0.66 |
| NSCAC_0310 |      | Phosphate ABC transporter, inner membrane subunit PstA                | 92.7 | 102.1 | 11.9 | 0.2  | 0  | 0.19 | 0.4  |

|            |          |                                                                      |      |       |      |       |    |      |      |
|------------|----------|----------------------------------------------------------------------|------|-------|------|-------|----|------|------|
| NSCAC_1747 | hemA     | glutamyl tRNA reductase                                              | 92.5 | 145.1 | 22.7 | 36.8  | 0  | 0.51 | 0.72 |
| NSCAC_0114 |          | General secretion pathway protein D                                  | 92.5 | 121.2 | 17.4 | 10.4  | 0  | 0.84 | 0.92 |
| NSCAC_0567 | GLY<br>K | D-glycerate 3-kinase                                                 | 92.5 | 107.4 | 12.8 | 27.3  | 0  | 0.34 | 0.57 |
| NSCAC_0761 |          | conserved protein of unknown function                                | 92.4 | 139.5 | 118  | 122.5 | 0  | 0.87 | 0.93 |
| NSCAC_1294 | ygaF     | putative peroxiredoxin YgaF                                          | 92.4 | 140.5 | 48.2 | 19    | 0  | 0.57 | 0.75 |
| NSCAC_1356 |          | membrane protein of unknown function                                 | 92.3 | 143.7 | 15.4 | 25.8  | 0  | 0.31 | 0.55 |
| NSCAC_1443 | nadE     | Glutamine-dependent NAD(+) synthetase                                | 92.2 | 92.4  | 4.7  | 10    | 0  | 0.08 | 0.22 |
| NSCAC_0769 |          | conserved protein of unknown function                                | 92.1 | 84.9  | 17.5 | 30.5  | -1 | 0.05 | 0.16 |
| NSCAC_1697 | argB     | Acetylglutamate kinase                                               | 92   | 155.6 | 16.3 | 45.5  | 0  | 0.3  | 0.54 |
| NSCAC_0907 | ycfH     | putative metallodependent hydrolase                                  | 91.7 | 144.6 | 22.2 | 9.6   | 0  | 0.26 | 0.49 |
| NSCAC_0639 |          | NUDIX hydrolase                                                      | 91.2 | 127.1 | 17.9 | 2.8   | 0  | 0.86 | 0.93 |
| NSCAC_1704 |          | Efflux transporter, RND family, MFP subunit                          | 91.1 | 142.3 | 41.6 | 31.3  | 0  | 0.43 | 0.66 |
| NSCAC_0812 |          | UbiA prenyltransferase family protein                                | 90.9 | 145.1 | 22.6 | 18.7  | 0  | 0.45 | 0.67 |
| NSCAC_1687 |          | conserved membrane protein of unknown function                       | 90.6 | 137.9 | 11.2 | 4.5   | 0  | 0.49 | 0.7  |
| NSCAC_1562 | serS     | seryl-tRNA synthetase, also charges selenocysteinyl-tRNA with serine | 90.4 | 221.7 | 17   | 35.6  | 1  | 0    | 0    |
| NSCAC_0422 | egtD     | Histidine-specific methyltransferase EgtD                            | 90.3 | 66.7  | 21.8 | 29.6  | -1 | 0.01 | 0.03 |
| NSCAC_0158 | dnaB     | replicative DNA helicase                                             | 90.3 | 182.1 | 15.5 | 7.4   | 1  | 0    | 0.02 |
| NSCAC_1364 | udg      | UDP-glucose 6-dehydrogenase                                          | 90.3 | 116.3 | 23.2 | 21    | 0  | 0.76 | 0.87 |
| NSCAC_0852 |          | MatE family protein                                                  | 90.2 | 152.5 | 9.9  | 13.5  | 0  | 0.1  | 0.26 |
| NSCAC_0459 |          | conserved protein of unknown function                                | 90.1 | 89.3  | 9.7  | 19.4  | 0  | 0.04 | 0.14 |
| NSCAC_0862 |          | Polysaccharide export protein                                        | 90   | 197.7 | 20.8 | 64.9  | 1  | 0.01 | 0.03 |
| NSCAC_1316 | glgA     | Glycogen synthase                                                    | 89.9 | 115.3 | 13.1 | 13.9  | 0  | 0.7  | 0.83 |
| NSCAC_0012 | yajL     | Chaperone protein YajL                                               | 89.8 | 191.6 | 33.5 | 56.9  | 1  | 0.03 | 0.1  |
| NSCAC_0611 |          | membrane protein of unknown function                                 | 89.6 | 191.4 | 15   | 69.2  | 1  | 0.03 | 0.12 |
| NSCAC_0741 | purL     | phosphoribosylformyl-glycineamide synthetase                         | 89.6 | 98.3  | 14.8 | 8.7   | 0  | 0.21 | 0.44 |
| NSCAC_0416 | ispA     | geranyltranstransferase                                              | 89.5 | 182.1 | 22.4 | 20    | 1  | 0    | 0.02 |
| NSCAC_1138 |          | O-acetyltransferase                                                  | 89.4 | 57.1  | 21.5 | 16.4  | -1 | 0    | 0.01 |
| NSCAC_1168 |          | Drug resistance transporter, EmrB/QacA subfamily                     | 89.3 | 62.4  | 13.5 | 1.5   | -1 | 0    | 0    |
| NSCAC_0320 | clpB     | protein disaggregation chaperone                                     | 89.3 | 128.3 | 15.3 | 15.3  | 0  | 0.67 | 0.82 |
| NSCAC_1318 | ggt      | Gamma-glutamyltranspeptidase                                         | 88.9 | 110.9 | 18.6 | 4.7   | 0  | 0.64 | 0.8  |

|            |      |                                                                 |      |       |      |      |    |      |      |
|------------|------|-----------------------------------------------------------------|------|-------|------|------|----|------|------|
| NSCAC_1609 |      | conserved membrane protein of unknown function                  | 88.5 | 108.4 | 30.2 | 21.9 | 0  | 0.61 | 0.78 |
| NSCAC_1330 |      | Asparagine synthetase                                           | 88.5 | 125.3 | 22.9 | 51.4 | 0  | 0.83 | 0.91 |
| NSCAC_0138 |      | Cytochrome oxidase biogenesis protein SCO1/SenC                 | 88.5 | 49.8  | 20.5 | 15.7 | -1 | 0    | 0    |
| NSCAC_0554 |      | Peptidase M48 Ste24p                                            | 88.3 | 77.8  | 33.3 | 7.8  | -1 | 0.04 | 0.14 |
| NSCAC_1778 | rsmG | Ribosomal RNA small subunit methyltransferase G                 | 88.2 | 101.3 | 17.7 | 53.3 | 0  | 0.43 | 0.66 |
| NSCAC_0658 | dedA | conserved hypothetical protein; putative inner membrane protein | 88   | 69.7  | 24.9 | 7.3  | -1 | 0    | 0.01 |
| NSCAC_1274 |      | conserved membrane protein of unknown function                  | 88   | 164   | 37.5 | 40.1 | 0  | 0.29 | 0.52 |
| NSCAC_0962 | ynfA | conserved hypothetical protein; putative inner membrane protein | 88   | 102.7 | 34.9 | 41.6 | 0  | 0.7  | 0.84 |
| NSCAC_0159 | alr  | alanine racemase 1, PLP-binding, biosynthetic                   | 87.7 | 163.4 | 24.7 | 15.8 | 0  | 0.14 | 0.34 |
| NSCAC_0884 |      | HAD-superfamily hydrolase, subfamily IA, variant 1              | 87.5 | 170.4 | 38.3 | 55.5 | 1  | 0.07 | 0.19 |
| NSCAC_1620 |      | conserved protein of unknown function                           | 87.3 | 129.5 | 27.9 | 35.7 | 0  | 0.68 | 0.83 |
| NSCAC_0407 | bamA | Outer membrane protein assembly factor BamA                     | 87.3 | 149.3 | 10.8 | 12.4 | 0  | 0.17 | 0.38 |
| NSCAC_0570 | dapE | Succinyl-diaminopimelate desuccinylase                          | 87.3 | 120.1 | 12.2 | 20.4 | 0  | 0.92 | 0.97 |
| NSCAC_0798 | ispD | 4-diphosphocytidyl-2C-methyl-D-erythritol synthase              | 87   | 118.4 | 14   | 26   | 0  | 0.96 | 0.98 |
| NSCAC_1736 |      | Sodium/hydrogen exchanger                                       | 87   | 122.6 | 14.4 | 11.4 | 0  | 0.82 | 0.91 |
| NSCAC_0806 |      | Short-chain dehydrogenase/reductase SDR                         | 87   | 84.4  | 40.8 | 27.2 | 0  | 0.19 | 0.41 |
| NSCAC_1494 |      | conserved protein of unknown function                           | 86.9 | 187.6 | 35.6 | 19.8 | 1  | 0.01 | 0.06 |
| NSCAC_0269 | yqgF | Holliday junction resolvase                                     | 86.7 | 195.1 | 29.7 | 11.8 | 1  | 0.01 | 0.04 |
| NSCAC_0432 |      | Sel1 repeat protein (fragment)                                  | 86   | 157.2 | 52.2 | 21   | 0  | 0.17 | 0.38 |
| NSCAC_0145 | xpsE | Type II secretion system protein E                              | 86   | 141.8 | 14.8 | 20.6 | 0  | 0.19 | 0.41 |
| NSCAC_0593 |      | putative Quercetin 2,3-dioxygenase                              | 85.9 | 153.4 | 40.8 | 35.4 | 0  | 0.16 | 0.36 |
| NSCAC_0476 | ureD | Urease accessory protein UreD                                   | 85.6 | 347.6 | 19.5 | 91.3 | 2  | 0    | 0    |
| NSCAC_1454 |      | RutC family protein in vnfA 5'region                            | 85.5 | 236.8 | 35.1 | 94.1 | 1  | 0    | 0.01 |
| NSCAC_1556 |      | Squalene/phytoene synthase                                      | 85.4 | 279.7 | 25.9 | 38.8 | 1  | 0    | 0    |
| NSCAC_1317 | ppc  | Phosphoenolpyruvate carboxylase                                 | 85.3 | 120.2 | 20.9 | 16.2 | 0  | 0.76 | 0.87 |
| NSCAC_1413 | ftsQ | Cell division protein FtsQ                                      | 85.3 | 209   | 52.6 | 68   | 1  | 0.02 | 0.07 |
| NSCAC_1465 | yqaA | Inner membrane protein YqaA                                     | 85.2 | 125.4 | 10.1 | 39.1 | 0  | 0.74 | 0.86 |
| NSCAC_0271 |      | putative TonB family protein                                    | 85.1 | 233.9 | 4    | 21.4 | 1  | 0    | 0    |
| NSCAC_1017 |      | exported protein of unknown function                            | 85.1 | 69.4  | 29.6 | 9.2  | -1 | 0.01 | 0.05 |
| NSCAC_1088 |      | putative [NiFe]-hydrogenase, membrane subunit HyfE              | 84.9 | 110.6 | 35.8 | 3.1  | 0  | 0.85 | 0.92 |
| NSCAC_0928 |      | conserved protein of unknown function                           | 84.4 | 87.3  | 26.2 | 22.4 | 0  | 0.2  | 0.42 |

|            |      |                                                         |      |       |      |      |    |      |      |
|------------|------|---------------------------------------------------------|------|-------|------|------|----|------|------|
| NSCAC_1254 | nadB | L-aspartate oxidase                                     | 84.3 | 132.7 | 20.7 | 4.2  | 0  | 0.43 | 0.66 |
| NSCAC_1349 |      | Sugar transferase, PEP-CTERM system associated          | 84.3 | 107.9 | 27.6 | 17   | 0  | 0.79 | 0.89 |
| NSCAC_1322 |      | Peptidase M16 domain protein                            | 84.1 | 100.6 | 6.4  | 21.9 | 0  | 0.41 | 0.64 |
| NSCAC_0782 |      | Biotin/acetyl-CoA-carboxylase ligase                    | 83.9 | 102.3 | 21.6 | 17.2 | 0  | 0.57 | 0.75 |
| NSCAC_0321 |      | Invasion gene expression up-regulator, SirB             | 83.8 | 168.4 | 52.4 | 5.1  | 1  | 0.09 | 0.24 |
| NSCAC_1257 |      | Glycosyl transferase family 4                           | 83.8 | 98.7  | 42.1 | 20.5 | 0  | 0.65 | 0.8  |
| NSCAC_1344 |      | PEP-CTERM system associated protein                     | 83.7 | 82.9  | 14.8 | 11   | 0  | 0.12 | 0.3  |
| NSCAC_0386 | galU | UTP--glucose-1-phosphate uridylyltransferase            | 83.7 | 134   | 18.6 | 13.6 | 0  | 0.34 | 0.58 |
| NSCAC_0898 |      | exported protein of unknown function                    | 83.6 | 148.5 | 32.6 | 85.2 | 0  | 0.3  | 0.53 |
| NSCAC_1734 | tatB | Sec-independent protein translocase protein TatB        | 83.5 | 91.2  | 16.3 | 42.5 | 0  | 0.29 | 0.52 |
| NSCAC_0010 | argS | Arginine--tRNA ligase                                   | 83.4 | 80.8  | 21.3 | 13.7 | 0  | 0.05 | 0.16 |
| NSCAC_0057 | yfeH | putative sodium/bile acid symporter family (mazG-like)  | 83.4 | 78.4  | 9.5  | 23.5 | -1 | 0.06 | 0.18 |
| NSCAC_0934 | uvrC | excinuclease UvrABC, endonuclease subunit               | 83.3 | 115.2 | 27.3 | 22.7 | 0  | 0.86 | 0.93 |
| NSCAC_1319 |      | putative ferredoxin [4Fe-4S] (Fdx)                      | 82.8 | 62.8  | 74.6 | 71.2 | -1 | 0.44 | 0.67 |
| NSCAC_0105 | dapF | diaminopimelate epimerase                               | 82.5 | 145.2 | 36.2 | 22.4 | 0  | 0.21 | 0.43 |
| NSCAC_0166 |      | Protein-L-isoaspartate(D-aspartate) O-methyltransferase | 81.5 | 179   | 8.1  | 34.9 | 1  | 0    | 0.01 |
| NSCAC_0395 | cysM | Cysteine synthase                                       | 81.1 | 154   | 15.6 | 29.3 | 0  | 0.02 | 0.08 |
| NSCAC_0556 | phnW | 2-aminoethylphosphonate--pyruvate transaminase          | 81   | 230.5 | 17.6 | 23.7 | 1  | 0    | 0    |
| NSCAC_0572 |      | conserved protein of unknown function                   | 80.8 | 167.8 | 22.9 | 20.9 | 1  | 0.01 | 0.03 |
| NSCAC_1124 | proS | prolyl-tRNA synthetase                                  | 80.8 | 87.6  | 13.1 | 23.2 | 0  | 0.18 | 0.39 |
| NSCAC_1079 | leuD | 3-isopropylmalate dehydratase, small subunit            | 80.7 | 122.3 | 16.9 | 23.3 | 0  | 0.45 | 0.67 |
| NSCAC_0205 | grpE | Protein GrpE                                            | 80.1 | 166.6 | 28.1 | 87   | 1  | 0.1  | 0.25 |
| NSCAC_1692 | proC | Pyrroline-5-carboxylate reductase                       | 80.1 | 92.4  | 24.7 | 23.5 | 0  | 0.53 | 0.73 |
| NSCAC_0338 | exoB | UDP-glucose 4-epimerase                                 | 80   | 181.4 | 31.2 | 7.4  | 1  | 0    | 0.02 |
| NSCAC_1222 |      | Methyltransferase domain family                         | 80   | 207.4 | 36.5 | 30.6 | 1  | 0    | 0.01 |
| NSCAC_0853 |      | Sulfotransferase                                        | 80   | 116.6 | 1.8  | 50.6 | 0  | 0.8  | 0.9  |
| NSCAC_0323 |      | exported protein of unknown function                    | 79.8 | 104.8 | 31.8 | 59.9 | 0  | 0.89 | 0.95 |
| NSCAC_0204 | hrcA | Heat-inducible transcription repressor HrcA             | 79.8 | 148.1 | 24.9 | 29.8 | 0  | 0.1  | 0.26 |
| NSCAC_0881 | hisC | Histidinol-phosphate aminotransferase                   | 79.6 | 111.9 | 9    | 1.7  | 0  | 0.78 | 0.88 |
| NSCAC_1459 |      | conserved protein of unknown function                   | 79.5 | 165.6 | 20.4 | 48.4 | 1  | 0.02 | 0.07 |
| NSCAC_0582 |      | conserved protein of unknown function                   | 79.5 | 101.4 | 32.4 | 13.9 | 0  | 0.86 | 0.93 |

|            |      |                                                                       |      |       |      |      |    |      |      |
|------------|------|-----------------------------------------------------------------------|------|-------|------|------|----|------|------|
| NSCAC_0516 | ileS | isoleucyl-tRNA synthetase                                             | 79.5 | 121.9 | 13.2 | 9.4  | 0  | 0.37 | 0.6  |
| NSCAC_1221 |      | ABC transporter related protein                                       | 79.4 | 154.7 | 25.8 | 49.5 | 1  | 0.05 | 0.16 |
| NSCAC_0681 |      | Peptidase M16C associated domain protein                              | 79.2 | 120.3 | 9.3  | 14.7 | 0  | 0.5  | 0.71 |
| NSCAC_1200 |      | conserved protein of unknown function                                 | 79.2 | 170.6 | 44.1 | 96   | 1  | 0.12 | 0.29 |
| NSCAC_1389 | yihA | GTP-binding protein                                                   | 79.2 | 105.5 | 20.4 | 11.5 | 0  | 0.97 | 0.99 |
| NSCAC_0104 |      | conserved protein of unknown function                                 | 79.2 | 176.1 | 14   | 32.7 | 1  | 0.02 | 0.08 |
| NSCAC_0808 |      | conserved membrane protein of unknown function                        | 78.8 | 105.9 | 15   | 20.7 | 0  | 0.92 | 0.97 |
| NSCAC_0473 |      | ABC transporter, permease component                                   | 78.7 | 151.7 | 21.7 | 14   | 1  | 0.03 | 0.1  |
| NSCAC_1536 |      | CDP-alcohol phosphatidyltransferase                                   | 78.5 | 82.6  | 11.9 | 17   | 0  | 0.2  | 0.42 |
| NSCAC_0613 |      | UbiE/COQ5 methyltransferase                                           | 78.4 | 146.9 | 5.6  | 33   | 0  | 0.05 | 0.16 |
| NSCAC_0871 | aroG | Phospho-2-dehydro-3-deoxyheptonate aldolase                           | 78.4 | 139.4 | 7    | 20.2 | 0  | 0.13 | 0.32 |
| NSCAC_1162 |      | putative sugar transporter of the major facilitator superfamily (MFS) | 78.3 | 70.5  | 10.9 | 3.8  | -1 | 0.02 | 0.08 |
| NSCAC_1745 | lolB | Outer-membrane lipoprotein LolB                                       | 77.6 | 119.6 | 32.9 | 22.8 | 0  | 0.65 | 0.8  |
| NSCAC_1094 |      | protein of unknown function                                           | 77.4 | 103.8 | 26.5 | 26.9 | 0  | 0.99 | 0.99 |
| NSCAC_0190 |      | Monooxygenase FAD-binding protein                                     | 77.2 | 99.1  | 21.3 | 6    | 0  | 0.79 | 0.89 |
| NSCAC_1201 | yhfA | Protein YhfA                                                          | 77.2 | 108.2 | 21.8 | 19.3 | 0  | 0.81 | 0.9  |
| NSCAC_1417 | murG | N-acetylglucosaminyl transferase                                      | 77.2 | 155.6 | 25.9 | 35.7 | 1  | 0.02 | 0.09 |
| NSCAC_0813 | hslR | Heat shock protein 15 homolog                                         | 77.2 | 240.7 | 30   | 36.9 | 1  | 0    | 0    |
| NSCAC_0774 | mfd  | transcription-repair coupling factor                                  | 77.2 | 112.4 | 6.3  | 5.4  | 0  | 0.6  | 0.77 |
| NSCAC_1077 |      | Sulfatase                                                             | 77.1 | 79.7  | 30.1 | 9.3  | 0  | 0.27 | 0.5  |
| NSCAC_0148 |      | General secretion pathway protein H                                   | 77.1 | 133.3 | 38.8 | 1    | 0  | 0.42 | 0.65 |
| NSCAC_0622 |      | conserved membrane protein of unknown function                        | 76.9 | 95.8  | 16   | 23   | 0  | 0.64 | 0.8  |
| NSCAC_1515 | proA | Gamma-glutamyl phosphate reductase                                    | 76.9 | 101.2 | 33.9 | 9    | 0  | 0.93 | 0.97 |
| NSCAC_1179 |      | protein of unknown function                                           | 76.3 | 39.9  | 10.5 | 5.3  | -1 | 0    | 0    |
| NSCAC_0095 |      | conserved protein of unknown function                                 | 76   | 146   | 32   | 27.8 | 0  | 0.17 | 0.39 |
| NSCAC_0412 | bamB | Outer membrane protein assembly factor BamB                           | 75.5 | 163.1 | 27.1 | 30   | 1  | 0.06 | 0.18 |
| NSCAC_1253 | rpoE | RNA polymerase, sigma 24 (sigma E) factor                             | 75.4 | 107.6 | 39.7 | 22.8 | 0  | 0.74 | 0.86 |
| NSCAC_1592 |      | conserved protein of unknown function                                 | 75.3 | 259.5 | 40.4 | 67.4 | 1  | 0    | 0    |
| NSCAC_0272 |      | Surface antigen (D15)                                                 | 75.1 | 118.2 | 18.4 | 12.1 | 0  | 0.38 | 0.61 |
| NSCAC_1238 |      | Agmatine deiminase                                                    | 75   | 138.3 | 53.2 | 13.2 | 0  | 0.27 | 0.51 |
| NSCAC_0202 |      | Generic methyl-transferase                                            | 74.9 | 115.7 | 16.7 | 16.9 | 0  | 0.41 | 0.64 |

|            |      |                                                                       |      |       |      |      |    |      |      |
|------------|------|-----------------------------------------------------------------------|------|-------|------|------|----|------|------|
| NSCAC_0911 |      | Aminodeoxychorismate lyase                                            | 74.8 | 162.2 | 26.6 | 2    | 1  | 0    | 0.02 |
| NSCAC_1083 |      | Nucleosidase                                                          | 74.6 | 158.8 | 47.2 | 56.3 | 1  | 0.07 | 0.21 |
| NSCAC_0466 |      | Phospholipase C 4                                                     | 74.5 | 256.1 | 9.4  | 10.8 | 1  | 0    | 0    |
| NSCAC_1054 | lptD | LPS-assembly protein LptD                                             | 74.3 | 99.1  | 8    | 22.4 | 0  | 0.99 | 1    |
| NSCAC_1466 | pilA | PilA                                                                  | 74   | 82.8  | 28.3 | 27.6 | 0  | 0.53 | 0.73 |
| NSCAC_0126 |      | Glutamine amidotransferase class-I                                    | 73.9 | 93.1  | 18   | 49.7 | 0  | 0.71 | 0.85 |
| NSCAC_0103 | lysA | Diaminopimelate decarboxylase                                         | 73.8 | 141.3 | 13.2 | 11.5 | 1  | 0.01 | 0.06 |
| NSCAC_0788 | fpr  | Ferredoxin--NADP reductase                                            | 73.8 | 119.6 | 35.9 | 59.1 | 0  | 0.49 | 0.71 |
| NSCAC_1597 | smf  | conserved hypothetical protein                                        | 73.7 | 102.4 | 6.2  | 15   | 0  | 0.89 | 0.95 |
| NSCAC_1259 | manC | Mannose-1-phosphate guanylyltransferase/mannose-6-phosphate isomerase | 73.6 | 104.9 | 6.4  | 9    | 0  | 0.77 | 0.88 |
| NSCAC_0861 |      | putative Polysaccharide export protein                                | 73.5 | 120.2 | 30   | 50.6 | 0  | 0.4  | 0.63 |
| NSCAC_0093 | aspS | aspartyl-tRNA synthetase                                              | 73.5 | 86.8  | 25   | 9.7  | 0  | 0.55 | 0.74 |
| NSCAC_1670 | queE | 7-carboxy-7-deazaguanine synthase                                     | 73.4 | 70.6  | 21   | 19.8 | -1 | 0.19 | 0.4  |
| NSCAC_1365 | gatB | Aspartyl/glutamyl-tRNA(Asn/Gln) amidotransferase subunit B            | 73.3 | 106   | 31.1 | 32.5 | 0  | 0.73 | 0.86 |
| NSCAC_1612 |      | conserved membrane protein of unknown function                        | 72.9 | 85.9  | 11.1 | 8.8  | 0  | 0.47 | 0.68 |
| NSCAC_0896 |      | conserved protein of unknown function                                 | 72.9 | 109.6 | 18.1 | 26.4 | 0  | 0.73 | 0.86 |
| NSCAC_0535 |      | Thiol-disulfide interchange protein DsbC                              | 72.8 | 155.5 | 10.6 | 11.2 | 1  | 0    | 0.02 |
| NSCAC_1163 |      | putative sugar transporter of the major facilitator superfamily (MFS) | 72.7 | 122.1 | 7    | 12.5 | 0  | 0.18 | 0.4  |
| NSCAC_1741 | pth  | peptidyl-tRNA hydrolase                                               | 72.7 | 88.7  | 22.2 | 17.6 | 0  | 0.6  | 0.77 |
| NSCAC_0865 |      | exported protein of unknown function                                  | 72.6 | 101.2 | 10.6 | 25   | 0  | 0.91 | 0.96 |
| NSCAC_0956 | ligA | DNA ligase, NAD(+)-dependent                                          | 72.5 | 115.7 | 20.9 | 13   | 0  | 0.28 | 0.51 |
| NSCAC_0618 |      | Sel1 domain protein repeat-containing protein                         | 72.4 | 186.6 | 26   | 72   | 1  | 0    | 0.01 |
| NSCAC_0786 |      | conserved protein of unknown function                                 | 72.3 | 130.4 | 24.7 | 3.6  | 0  | 0.27 | 0.5  |
| NSCAC_1731 | hisE | Phosphoribosyl-ATP pyrophosphatase/Phosphoribosyl-AMP cyclohydrolase  | 72.3 | 227.7 | 13.3 | 58.9 | 1  | 0    | 0    |
| NSCAC_0522 |      | protein of unknown function                                           | 72.2 | 155.5 | 8.5  | 32.5 | 1  | 0.01 | 0.05 |
| NSCAC_0471 |      | conserved membrane protein of unknown function                        | 71.7 | 110.8 | 19.6 | 32.7 | 0  | 0.62 | 0.78 |
| NSCAC_1081 |      | Major facilitator superfamily MFS_1                                   | 71.7 | 97.4  | 14.3 | 9.3  | 0  | 0.97 | 0.99 |
| NSCAC_0429 |      | protein of unknown function                                           | 71.7 | 41.5  | 25.6 | 11.7 | -1 | 0    | 0.02 |
| NSCAC_0389 | prfB | Peptide chain release factor 2                                        | 71.2 | 149.3 | 13.1 | 17.5 | 1  | 0.01 | 0.03 |
| NSCAC_1089 |      | putative [NiFe]-hydrogenase, membrane subunit HyfC                    | 70.9 | 117.5 | 18.8 | 7.6  | 0  | 0.36 | 0.6  |

|            |      |                                                                |      |       |      |      |    |      |      |
|------------|------|----------------------------------------------------------------|------|-------|------|------|----|------|------|
| NSCAC_0110 |      | Type II secretion system protein K                             | 70.9 | 140.4 | 3.2  | 27   | 1  | 0.03 | 0.11 |
| NSCAC_1039 | pgm  | Phosphoglucomutase                                             | 70.8 | 88.8  | 15.7 | 18   | 0  | 0.74 | 0.86 |
| NSCAC_1557 | rluB | 23S rRNA pseudouridylate synthase                              | 70.7 | 123.1 | 35.9 | 8.7  | 0  | 0.26 | 0.49 |
| NSCAC_0069 | aroK | Shikimate kinase                                               | 70.7 | 141.1 | 43.9 | 92.7 | 1  | 0.25 | 0.48 |
| NSCAC_0555 | pepN | Aminopeptidase N                                               | 70.7 | 95.5  | 8    | 11.3 | 0  | 0.98 | 0.99 |
| NSCAC_0292 | yjeF | putative carbohydrate kinase                                   | 70.7 | 72    | 19.6 | 14.8 | 0  | 0.22 | 0.44 |
| NSCAC_0558 |      | Phosphoenolpyruvate phosphomutase                              | 70.6 | 117.6 | 11.1 | 12.9 | 0  | 0.18 | 0.4  |
| NSCAC_1517 |      | Rare lipoprotein B family                                      | 70.6 | 50.7  | 24.5 | 5.3  | -1 | 0    | 0.02 |
| NSCAC_0426 | ribB | 3,4-dihydroxy-2-butanone 4-phosphate synthase                  | 70.6 | 105.4 | 25.2 | 18.5 | 0  | 0.54 | 0.73 |
| NSCAC_1401 |      | Methyltransferase type 12                                      | 70.5 | 81.2  | 25.8 | 18.5 | 0  | 0.5  | 0.71 |
| NSCAC_1595 | topA | DNA topoisomerase I                                            | 70.2 | 123.1 | 11.4 | 22.9 | 0  | 0.1  | 0.26 |
| NSCAC_0837 | metG | methionyl-tRNA synthetase                                      | 70.1 | 97.3  | 9.4  | 28.9 | 0  | 0.93 | 0.97 |
| NSCAC_0160 | radA | repair protein radA homolog                                    | 70.1 | 92.5  | 18.6 | 23.2 | 0  | 0.95 | 0.98 |
| NSCAC_0305 |      | Phosphate-selective porin O and P                              | 70.1 | 59    | 48.7 | 3.9  | -1 | 0.17 | 0.38 |
| NSCAC_0454 |      | Predicted molecular weight phosphotyrosine protein phosphatase | 70.1 | 96.2  | 15.3 | 15.2 | 0  | 0.92 | 0.97 |
| NSCAC_0179 | yadG | ABC transporter                                                | 69.9 | 114.9 | 45.3 | 9.7  | 0  | 0.43 | 0.66 |
| NSCAC_1095 |      | conserved protein of unknown function                          | 69.9 | 149.1 | 7.4  | 58   | 1  | 0.03 | 0.1  |
| NSCAC_1036 |      | conserved protein of unknown function                          | 69.7 | 75.3  | 9.2  | 24   | 0  | 0.36 | 0.6  |
| NSCAC_0258 |      | Excinuclease ABC, A subunit                                    | 69.7 | 63.3  | 5.6  | 6.9  | -1 | 0.04 | 0.13 |
| NSCAC_1416 | murC | UDP-N-acetylmuramate:L-alanine ligase                          | 69.7 | 125.5 | 14.4 | 17.2 | 0  | 0.11 | 0.28 |
| NSCAC_1308 | argF | ornithine carbamoyltransferase                                 | 69.5 | 81.4  | 31.7 | 20   | 0  | 0.56 | 0.75 |
| NSCAC_0803 | ampD | N-acetyl-anhydromuranmyl-L-alanine amidase                     | 69.2 | 47.7  | 11.9 | 16.5 | -1 | 0    | 0.01 |
| NSCAC_0117 |      | PpiC-type peptidyl-prolyl cis-trans isomerase                  | 69.1 | 143.6 | 8    | 41.6 | 1  | 0.01 | 0.05 |
| NSCAC_1117 | malQ | 4-alpha-glucanotransferase                                     | 69.1 | 168.2 | 5.3  | 18.2 | 1  | 0    | 0    |
| NSCAC_0398 | map  | methionine aminopeptidase                                      | 69   | 119.1 | 16.8 | 29.7 | 0  | 0.28 | 0.52 |
| NSCAC_0795 | kdsA | 2-dehydro-3-deoxyphosphooctonate aldolase                      | 68.6 | 92.8  | 36.1 | 11.7 | 0  | 0.91 | 0.96 |
| NSCAC_0510 |      | Glycosyl transferase family 2                                  | 68.5 | 99.6  | 1.6  | 5.3  | 0  | 0.64 | 0.8  |
| NSCAC_0488 |      | conserved membrane protein of unknown function                 | 68.4 | 50.9  | 23.7 | 12.5 | -1 | 0.03 | 0.1  |
| NSCAC_1247 | lepB | Signal peptidase I                                             | 68.3 | 120.6 | 17.7 | 44.6 | 0  | 0.19 | 0.41 |
| NSCAC_0335 |      | conserved protein of unknown function                          | 68.3 | 115.9 | 22.7 | 55.3 | 0  | 0.36 | 0.6  |
| NSCAC_1482 | gltA | Citrate synthase                                               | 68.2 | 110.1 | 1.2  | 16.8 | 0  | 0.32 | 0.55 |



|            |      |                                                                                                                   |      |       |      |      |    |      |      |
|------------|------|-------------------------------------------------------------------------------------------------------------------|------|-------|------|------|----|------|------|
| NSCAC_0425 | ribE | Riboflavin synthase                                                                                               | 68.1 | 100.5 | 44.3 | 14.6 | 0  | 0.68 | 0.83 |
| NSCAC_0231 | folP | 7,8-dihydropteroate synthase                                                                                      | 68   | 116.4 | 16.6 | 31.6 | 0  | 0.31 | 0.54 |
| NSCAC_0279 |      | protein of unknown function                                                                                       | 68   | 178.8 | 8.7  | 41.3 | 1  | 0    | 0    |
| NSCAC_1516 |      | DNA polymerase III, delta subunit                                                                                 | 67.9 | 102.4 | 21.4 | 10.3 | 0  | 0.5  | 0.71 |
| NSCAC_1712 | murJ | Protein MurJ homolog                                                                                              | 67.8 | 94    | 10.6 | 8.7  | 0  | 0.96 | 0.98 |
| NSCAC_1600 | fnt  | 10-formyltetrahydrofolate:L-methionyl-tRNA(fMet) N-formyltransferase                                              | 67.8 | 81.5  | 17.4 | 35.4 | 0  | 0.63 | 0.79 |
| NSCAC_0873 |      | Peptidase M61 domain protein                                                                                      | 67.6 | 97.1  | 17   | 4.3  | 0  | 0.69 | 0.83 |
| NSCAC_0870 |      | conserved protein of unknown function                                                                             | 67.6 | 52.4  | 31.9 | 15.5 | -1 | 0.07 | 0.21 |
| NSCAC_0124 |      | Glycosyl transferase family 2 (fragment)                                                                          | 67.5 | 71.4  | 7.2  | 7.1  | 0  | 0.16 | 0.36 |
| NSCAC_0431 |      | conserved protein of unknown function, Beta-lactamase-like                                                        | 67.3 | 99.3  | 18.6 | 26.3 | 0  | 0.67 | 0.82 |
| NSCAC_1409 |      | conserved protein of unknown function                                                                             | 67.3 | 110   | 40.2 | 51.1 | 0  | 0.75 | 0.87 |
| NSCAC_0979 |      | conserved protein of unknown function                                                                             | 67.2 | 34.5  | 30.9 | 16.5 | -1 | 0    | 0.01 |
| NSCAC_1052 | pdxA | 4-hydroxy-L-threonine phosphate dehydrogenase, NAD-dependent                                                      | 67   | 66    | 24.7 | 13.7 | 0  | 0.21 | 0.43 |
| NSCAC_1069 | trpF | N-(5'-phosphoribosyl)anthranilate isomerase                                                                       | 66.8 | 151.2 | 25.2 | 45.8 | 1  | 0.01 | 0.04 |
| NSCAC_0017 | gpsA | glycerol-3-phosphate dehydrogenase (NAD+)                                                                         | 66.7 | 90.2  | 14.5 | 10.3 | 0  | 0.93 | 0.97 |
| NSCAC_1636 | tadA | tRNA-specific adenosine deaminase                                                                                 | 66.7 | 86.7  | 29.9 | 41.8 | 0  | 0.9  | 0.96 |
| NSCAC_1114 | anmK | anhydro-N-acetylmuramic acid kinase                                                                               | 66.6 | 142   | 15.8 | 14.9 | 1  | 0.03 | 0.12 |
| NSCAC_1134 | pcnB | poly(A) polymerase I                                                                                              | 66.5 | 78    | 17.7 | 8.9  | 0  | 0.45 | 0.67 |
| NSCAC_0100 | pilD | Type 4 prepilin-like proteins leader peptide-processing enzyme [Includes: Leader peptidase ; N-methyltransferase] | 66.5 | 69.1  | 31.2 | 19.6 | 0  | 0.4  | 0.64 |
| NSCAC_1258 | cysC | Adenylyl-sulfate kinase                                                                                           | 66.5 | 103.5 | 27.3 | 22.9 | 0  | 0.47 | 0.69 |
| NSCAC_1449 | bioB | biotin synthase                                                                                                   | 66.4 | 93.7  | 11.2 | 7.6  | 0  | 0.87 | 0.93 |
| NSCAC_1777 |      | conserved protein of unknown function                                                                             | 66.3 | 148.3 | 18.2 | 36.3 | 1  | 0.01 | 0.03 |
| NSCAC_1637 |      | conserved protein of unknown function                                                                             | 66.3 | 98.4  | 7.9  | 17.1 | 0  | 0.6  | 0.77 |
| NSCAC_1190 |      | DNA repair protein RecN                                                                                           | 66.2 | 141.3 | 25.8 | 33.6 | 1  | 0.01 | 0.06 |
| NSCAC_1158 | hemH | Ferrochelatase                                                                                                    | 65.9 | 131.1 | 9.3  | 5.2  | 1  | 0.01 | 0.04 |
| NSCAC_0737 |      | Permease YjgP/YjgQ family protein                                                                                 | 65.9 | 57.1  | 24.5 | 2.7  | -1 | 0.05 | 0.16 |
| NSCAC_1194 |      | Signal peptide protein                                                                                            | 65.5 | 84.8  | 19.4 | 25.7 | 0  | 0.87 | 0.93 |
| NSCAC_0600 | corA | Magnesium and cobalt transport                                                                                    | 65.5 | 65.2  | 10.4 | 12.4 | 0  | 0.18 | 0.39 |
| NSCAC_0960 |      | Carbohydrate kinase                                                                                               | 65.3 | 77.7  | 3.4  | 17.7 | 0  | 0.59 | 0.77 |
| NSCAC_1414 | ddlB | D-alanine:D-alanine ligase                                                                                        | 65.2 | 200.5 | 11.4 | 15.1 | 1  | 0    | 0    |

|            |      |                                                                                    |      |       |      |      |    |      |      |
|------------|------|------------------------------------------------------------------------------------|------|-------|------|------|----|------|------|
| NSCAC_0382 | cysH | 5'-adenylsulfate reductase (thioredoxin)                                           | 65.1 | 84.5  | 22.6 | 12.8 | 0  | 0.87 | 0.94 |
| NSCAC_0307 |      | Phosphate-selective porin O and P                                                  | 65   | 142.4 | 28.5 | 21.4 | 1  | 0.01 | 0.06 |
| NSCAC_1328 |      | Glycosyl transferase, group 1                                                      | 65   | 69.1  | 21.9 | 29.4 | 0  | 0.31 | 0.54 |
| NSCAC_1485 | dat  | D-alanine aminotransferase                                                         | 64.9 | 107.8 | 22.2 | 20   | 0  | 0.27 | 0.51 |
| NSCAC_1103 | recA | DNA strand exchange and recombination protein with protease and nuclease activity. | 64.8 | 121.6 | 38.3 | 10.2 | 1  | 0.18 | 0.4  |
| NSCAC_0042 |      | putative Outer membrane efflux protein                                             | 64.7 | 61.8  | 10.5 | 11.8 | 0  | 0.11 | 0.28 |
| NSCAC_0200 | yibK | putative rRNA methylase                                                            | 64.6 | 144.1 | 17.6 | 39.1 | 1  | 0.02 | 0.08 |
| NSCAC_1602 | trkA | NAD-binding component of TrK potassium transporter                                 | 64.5 | 84.4  | 21.4 | 19.4 | 0  | 0.93 | 0.97 |
| NSCAC_0557 | ppd  | Phosphonopyruvate decarboxylase                                                    | 64.5 | 98.2  | 13   | 15   | 0  | 0.55 | 0.74 |
| NSCAC_0562 |      | Squalene/phytoene synthase                                                         | 64.4 | 97.1  | 19.4 | 6.5  | 0  | 0.6  | 0.77 |
| NSCAC_0712 | exbD | membrane spanning protein in TonB-ExbB-ExbD complex                                | 64.2 | 122.8 | 22.3 | 48.9 | 1  | 0.11 | 0.28 |
| NSCAC_0250 |      | conserved protein of unknown function                                              | 64.2 | 73.8  | 7.2  | 5.3  | 0  | 0.39 | 0.62 |
| NSCAC_0683 | hslO | 33 kDa chaperonin                                                                  | 64.2 | 81.6  | 5.1  | 14.8 | 0  | 0.74 | 0.86 |
| NSCAC_0814 | yheT | putative esterase YheT                                                             | 64.2 | 141.6 | 26.7 | 11.2 | 1  | 0.01 | 0.06 |
| NSCAC_0143 | rnr  | exoribonuclease R, RNase R                                                         | 64.2 | 154.5 | 17.1 | 3.3  | 1  | 0    | 0    |
| NSCAC_0968 |      | Phosphomethylpyrimidine kinase                                                     | 63.9 | 55.7  | 8.6  | 7.2  | -1 | 0.03 | 0.1  |
| NSCAC_1467 |      | Fimbrial protein                                                                   | 63.9 | 80.9  | 5.5  | 3.9  | 0  | 0.71 | 0.85 |
| NSCAC_1487 |      | RlpA-like protein (fragment)                                                       | 63.9 | 101.2 | 40.5 | 22.5 | 0  | 0.77 | 0.88 |
| NSCAC_0438 |      | Peptidase M28 (fragment)                                                           | 63.7 | 136.9 | 20.9 | 5.3  | 1  | 0.01 | 0.03 |
| NSCAC_0169 | waaD | ADP-L-glycero-D-mannoheptose-6-epimerase, NAD(P)-binding                           | 63.6 | 125.5 | 19.7 | 18.3 | 1  | 0.03 | 0.12 |
| NSCAC_1219 |      | conserved protein of unknown function                                              | 63.6 | 127.9 | 20   | 14.2 | 1  | 0.02 | 0.07 |
| NSCAC_0533 | xerD | site-specific tyrosine recombinase                                                 | 63.5 | 158.2 | 10.7 | 20.2 | 1  | 0    | 0    |
| NSCAC_1613 |      | conserved membrane protein of unknown function                                     | 62.9 | 146.3 | 23.3 | 7.7  | 1  | 0.01 | 0.06 |
| NSCAC_1599 | def  | peptide deformylase                                                                | 62.9 | 92.8  | 25.3 | 39.9 | 0  | 0.71 | 0.85 |
| NSCAC_0267 | pyrC | Dihydroorotase-like protein                                                        | 62.8 | 103.2 | 19.7 | 6.7  | 0  | 0.28 | 0.51 |
| NSCAC_0113 |      | conserved protein of unknown function                                              | 62.6 | 95.4  | 55.9 | 17.5 | 0  | 0.71 | 0.85 |
| NSCAC_1252 |      | Anti sigma-E protein RseA, N-terminal domain                                       | 62.6 | 103.6 | 39.4 | 46.3 | 0  | 0.5  | 0.71 |
| NSCAC_0254 |      | putative Uncharacterized inner membrane transporter yiJE                           | 62.4 | 66.3  | 45.1 | 25   | 0  | 0.47 | 0.69 |
| NSCAC_1638 | guaA | GMP synthetase (glutamine aminotransferase)                                        | 62.2 | 77.6  | 16.3 | 19.8 | 0  | 0.67 | 0.82 |
| NSCAC_0949 |      | conserved protein of unknown function                                              | 62.1 | 110.6 | 35.6 | 20.6 | 0  | 0.31 | 0.54 |

|            |      |                                                                                |      |       |      |      |    |      |      |
|------------|------|--------------------------------------------------------------------------------|------|-------|------|------|----|------|------|
| NSCAC_0923 |      | putative Sporulation domain protein                                            | 61.8 | 85.5  | 29.8 | 56.9 | 0  | 0.98 | 0.99 |
| NSCAC_0615 |      | putative N-hydroxyarylamine O-acetyltransferase                                | 61.8 | 109.3 | 32.4 | 30   | 0  | 0.23 | 0.46 |
| NSCAC_1518 | leuS | leucyl-tRNA synthetase                                                         | 61.7 | 66.1  | 27.5 | 6.9  | 0  | 0.39 | 0.62 |
| NSCAC_0515 |      | conserved protein of unknown function                                          | 61.7 | 94.3  | 35.5 | 38.2 | 0  | 0.82 | 0.9  |
| NSCAC_0620 |      | conserved protein of unknown function                                          | 61.6 | 124.2 | 25.5 | 14.3 | 1  | 0.06 | 0.19 |
| NSCAC_1448 | bioF | 8-amino-7-oxononanoate synthase                                                | 61.5 | 102.5 | 6    | 30.3 | 0  | 0.38 | 0.61 |
| NSCAC_1373 |      | Glycosyl transferase family 9                                                  | 61.4 | 81.5  | 13.5 | 7.5  | 0  | 0.87 | 0.94 |
| NSCAC_0312 | phoU | negative regulator of PhoR/PhoB two-component regulator                        | 61.3 | 110.6 | 5.9  | 15.6 | 0  | 0.09 | 0.24 |
| NSCAC_1078 | leuB | 3-isopropylmalate dehydrogenase                                                | 61.3 | 62.8  | 30.9 | 5.7  | 0  | 0.37 | 0.61 |
| NSCAC_0617 |      | conserved protein of unknown function                                          | 60.9 | 31.5  | 11.2 | 49   | -2 | 0.37 | 0.61 |
| NSCAC_0624 |      | putative Spore coat protein CotH                                               | 60.9 | 144.1 | 19.5 | 11.5 | 1  | 0    | 0.01 |
| NSCAC_1207 |      | conserved membrane protein of unknown function                                 | 60.8 | 72.5  | 14.4 | 9.6  | 0  | 0.56 | 0.74 |
| NSCAC_1151 | acrR | TetR/AcrR family transcriptional regulator, acrAB operon repressor             | 60.7 | 122   | 31.2 | 66   | 0  | 0.3  | 0.54 |
| NSCAC_1175 |      | Efflux transporter, RND family, MFP subunit                                    | 60.6 | 78.7  | 11.6 | 20.4 | 0  | 0.77 | 0.88 |
| NSCAC_1519 | CHA1 | L-threonine ammonia-lyase                                                      | 60.5 | 81.3  | 10   | 11.2 | 0  | 0.94 | 0.97 |
| NSCAC_0646 |      | CRISPR-associated protein, Csy4 family                                         | 60.5 | 96.3  | 40   | 12.9 | 0  | 0.75 | 0.87 |
| NSCAC_0170 | rfaE | fused heptose 7-phosphate kinase ; heptose 1-phosphate adenylyltransferase     | 60.2 | 110   | 10.6 | 15.3 | 0  | 0.08 | 0.21 |
| NSCAC_1047 |      | DNA protecting protein DprA                                                    | 60.2 | 91.6  | 13.7 | 72.8 | 0  | 0.79 | 0.89 |
| NSCAC_1759 |      | conserved protein of unknown function                                          | 60.1 | 88.8  | 9.2  | 11   | 0  | 0.59 | 0.77 |
| NSCAC_1652 | rubA | rubredoxin                                                                     | 60.1 | 132.7 | 32.6 | 22.6 | 1  | 0.13 | 0.31 |
| NSCAC_0713 | czcA | Cation efflux system protein CzcA                                              | 60   | 76.7  | 14   | 9    | 0  | 0.73 | 0.86 |
| NSCAC_0309 |      | Binding-protein-dependent transport systems inner membrane component           | 59.9 | 85    | 3.9  | 5.8  | 0  | 0.8  | 0.9  |
| NSCAC_0793 | tilS | tRNA(Ile)-lysine synthase                                                      | 59.7 | 81.1  | 18.3 | 3.3  | 0  | 0.95 | 0.98 |
| NSCAC_1598 |      | Peptidoglycan-binding LysM (fragment)                                          | 59.6 | 119.6 | 29.2 | 22.7 | 1  | 0.06 | 0.18 |
| NSCAC_1433 |      | FAD linked oxidase domain protein                                              | 59.5 | 154.3 | 15.3 | 26.5 | 1  | 0    | 0    |
| NSCAC_1542 |      | Pentapeptide repeat protein                                                    | 59.5 | 72.7  | 39.5 | 37   | 0  | 0.81 | 0.9  |
| NSCAC_1415 | murB | UDP-N-acetylenolpyruvoylglucosamine reductase                                  | 59.4 | 139   | 18.7 | 6.9  | 1  | 0    | 0.01 |
| NSCAC_0569 |      | conserved protein of unknown function                                          | 59.2 | 110   | 4.8  | 22.1 | 0  | 0.12 | 0.3  |
| NSCAC_1699 | dut  | deoxyuridine 5'-triphosphate nucleotidohydrolase                               | 59.2 | 108   | 22.1 | 30   | 0  | 0.22 | 0.44 |
| NSCAC_1425 | mraW | S-adenosyl-dependent methyltransferase activity on membrane-located substrates | 59.1 | 150.5 | 14   | 32.8 | 1  | 0    | 0    |

|            |      |                                                                                         |      |       |      |      |    |      |      |
|------------|------|-----------------------------------------------------------------------------------------|------|-------|------|------|----|------|------|
| NSCAC_0448 | corA | magnesium/cobalt transporter                                                            | 59   | 125   | 1.2  | 20.3 | 1  | 0.01 | 0.03 |
| NSCAC_1382 |      | putative O-antigen polymerase                                                           | 58.8 | 102.8 | 22.4 | 9.5  | 0  | 0.15 | 0.36 |
| NSCAC_0144 | psd  | Phosphatidylserine decarboxylase proenzyme                                              | 58.7 | 134.8 | 16.1 | 19.3 | 1  | 0.02 | 0.09 |
| NSCAC_0843 |      | Tetratricopeptide repeat domain protein                                                 | 58.6 | 112.2 | 12.3 | 11   | 1  | 0.04 | 0.12 |
| NSCAC_1080 |      | Peptidase M50 (fragment)                                                                | 58.5 | 80.2  | 15.5 | 10.5 | 0  | 0.98 | 0.99 |
| NSCAC_0047 |      | conserved protein of unknown function                                                   | 58.5 | 92.2  | 10.4 | 17.2 | 0  | 0.52 | 0.72 |
| NSCAC_0585 |      | conserved protein of unknown function                                                   | 58.4 | 86.2  | 24.6 | 16.1 | 0  | 0.62 | 0.78 |
| NSCAC_1630 |      | putative DNA polymerase III, subunits gamma and tau                                     | 58.2 | 66.7  | 18.6 | 3.8  | 0  | 0.42 | 0.66 |
| NSCAC_0302 |      | Peptidase M23                                                                           | 58.1 | 72.6  | 29.4 | 13   | 0  | 0.79 | 0.89 |
| NSCAC_0403 | ispU | undecaprenyl pyrophosphate synthase                                                     | 58.1 | 111.9 | 26.4 | 20.4 | 1  | 0.1  | 0.26 |
| NSCAC_0891 |      | protein of unknown function                                                             | 57.9 | 76.5  | 16.4 | 55.8 | 0  | 0.86 | 0.93 |
| NSCAC_0989 | gor  | Glutathione reductase                                                                   | 57.9 | 77.1  | 12.2 | 12.4 | 0  | 0.99 | 1    |
| NSCAC_0841 |      | Protein-tyrosine kinase                                                                 | 57.7 | 102   | 11.9 | 24.6 | 0  | 0.13 | 0.32 |
| NSCAC_1023 |      | protein of unknown function                                                             | 57.7 | 5.8   | 26.8 | 10   | -4 | 0.07 | 0.2  |
| NSCAC_0002 | gyrB | DNA gyrase, subunit B                                                                   | 57.7 | 70.6  | 9    | 34   | 0  | 0.61 | 0.78 |
| NSCAC_0040 |      | conserved membrane protein of unknown function                                          | 57.6 | 57.5  | 23.2 | 15.9 | 0  | 0.23 | 0.45 |
| NSCAC_1045 |      | conserved protein of unknown function                                                   | 57.6 | 107.5 | 29.1 | 38.1 | 1  | 0.21 | 0.43 |
| NSCAC_1594 | purE | N5-carboxyaminoimidazole ribonucleotide mutase                                          | 57.3 | 90    | 11.3 | 26.6 | 0  | 0.48 | 0.69 |
| NSCAC_1234 | rph  | Ribonuclease PH                                                                         | 57.3 | 63.1  | 17.4 | 16.9 | 0  | 0.34 | 0.58 |
| NSCAC_1251 |      | Sigma E regulatory protein, MucB/RseB                                                   | 57.3 | 96.1  | 3.7  | 25.8 | 0  | 0.32 | 0.55 |
| NSCAC_0098 |      | DNA gyrase inhibitor YacG (fragment)                                                    | 57   | 130.1 | 33.4 | 52.6 | 1  | 0.19 | 0.4  |
| NSCAC_0108 |      | conserved protein of unknown function                                                   | 56.6 | 91.2  | 10.5 | 9.5  | 0  | 0.29 | 0.52 |
| NSCAC_0467 |      | protein of unknown function                                                             | 56.6 | 83.2  | 40.5 | 33.4 | 0  | 0.79 | 0.89 |
| NSCAC_0635 |      | putative thiol-disulfide oxidoreductase DCC                                             | 56.4 | 62.7  | 3.6  | 6.6  | 0  | 0.31 | 0.54 |
| NSCAC_0691 |      | Response regulator containing a CheY-like receiver domain and an HTH DNA-binding domain | 56.3 | 58.1  | 14   | 13.9 | 0  | 0.29 | 0.52 |
| NSCAC_0538 | gltX | Glutamate-tRNA ligase                                                                   | 56.3 | 91.6  | 8.5  | 21.2 | 0  | 0.39 | 0.62 |
| NSCAC_0322 | ybbO | Uncharacterized oxidoreductase YbbO                                                     | 56.2 | 90.3  | 4.4  | 10.4 | 0  | 0.39 | 0.62 |
| NSCAC_1654 |      | MscS Mechanosensitive ion channel                                                       | 56.2 | 59.2  | 11.5 | 26   | 0  | 0.28 | 0.51 |
| NSCAC_0266 |      | Dihydroorotate oxidase B, electron transfer subunit                                     | 56   | 53.3  | 15   | 2.6  | -1 | 0.09 | 0.24 |
| NSCAC_0910 | tmk  | Thymidylate kinase                                                                      | 56   | 82.1  | 11.7 | 23   | 0  | 0.67 | 0.82 |

|            |      |                                                                        |      |       |      |      |    |      |      |
|------------|------|------------------------------------------------------------------------|------|-------|------|------|----|------|------|
| NSCAC_1347 |      | Polysaccharide export protein, PEP-CTERM sytem-associated              | 55.7 | 82.7  | 21.7 | 15.9 | 0  | 0.84 | 0.92 |
| NSCAC_1205 | speD | S-adenosylmethionine decarboxylase                                     | 55.7 | 101.4 | 18.3 | 19   | 0  | 0.11 | 0.27 |
| NSCAC_1235 | yggV | dITP/XTP pyrophosphatase                                               | 55.6 | 75.9  | 9.8  | 20.5 | 0  | 0.99 | 0.99 |
| NSCAC_1511 | rng  | ribonuclease G                                                         | 55.6 | 95.5  | 14.4 | 8.3  | 0  | 0.17 | 0.38 |
| NSCAC_1283 |      | Phage SPO1 DNA polymerase-related protein                              | 55.4 | 110.4 | 36.9 | 9.1  | 1  | 0.29 | 0.52 |
| NSCAC_0414 | folE | GTP cyclohydrolase FolE2                                               | 55.3 | 134   | 33.8 | 27.1 | 1  | 0.01 | 0.06 |
| NSCAC_1596 | smg  | conserved hypothetical protein                                         | 55.3 | 120.3 | 12.6 | 31.2 | 1  | 0.02 | 0.09 |
| NSCAC_1070 | truA | pseudouridylate synthase I                                             | 55.3 | 76.8  | 11.3 | 29.8 | 0  | 0.85 | 0.92 |
| NSCAC_0581 |      | Glutathione S-transferase, N-terminal domain                           | 54.9 | 99.5  | 20.1 | 24.5 | 0  | 0.33 | 0.56 |
| NSCAC_1141 |      | Type III restriction system methylase (fragment)                       | 54.8 | 43.6  | 23   | 25.4 | -1 | 0.13 | 0.31 |
| NSCAC_1142 |      | conserved protein of unknown function                                  | 54.8 | 62.5  | 14.4 | 16   | 0  | 0.44 | 0.66 |
| NSCAC_0630 |      | exported protein of unknown function                                   | 54.8 | 73.7  | 14.5 | 8.5  | 0  | 0.93 | 0.97 |
| NSCAC_1002 |      | putative Cyanuric acid amidohydrolase                                  | 54.6 | 213.4 | 5.8  | 48.4 | 2  | 0    | 0    |
| NSCAC_0049 | thyA | thymidylate synthetase                                                 | 54.6 | 104.9 | 33   | 21.9 | 1  | 0.22 | 0.44 |
| NSCAC_1583 |      | PTS IIA-like nitrogen-regulatory protein PtsN                          | 54.6 | 135.1 | 18.3 | 30.9 | 1  | 0    | 0.02 |
| NSCAC_0920 |      | protein of unknown function                                            | 54.5 | 93.2  | 10.1 | 37   | 0  | 0.29 | 0.52 |
| NSCAC_1400 |      | Peptidase, S49 (Protease IV) family                                    | 54.2 | 132.2 | 17   | 28   | 1  | 0    | 0.01 |
| NSCAC_0849 |      | DNA polymerase, beta domain protein region (fragment)                  | 54.2 | 55.8  | 33.8 | 34.2 | 0  | 0.47 | 0.68 |
| NSCAC_1241 |      | conserved protein of unknown function                                  | 54.2 | 51.2  | 47.6 | 17.6 | 0  | 0.8  | 0.9  |
| NSCAC_1614 |      | Mov34/MPN/PAD-1 family protein                                         | 54.1 | 73    | 15.3 | 17.7 | 0  | 0.96 | 0.98 |
| NSCAC_1345 |      | Protein-tyrosine kinase                                                | 54   | 104.8 | 27.1 | 31.3 | 1  | 0.12 | 0.29 |
| NSCAC_0413 | der  | GTPase involved in ribosome synthesis and maintenance                  | 54   | 133.1 | 7.9  | 21.9 | 1  | 0    | 0.01 |
| NSCAC_1131 | panC | pantothenate synthetase                                                | 54   | 83.4  | 18.2 | 30.5 | 0  | 0.57 | 0.75 |
| NSCAC_0661 | degT | Pleiotropic regulatory protein                                         | 53.9 | 147.5 | 20.3 | 27.2 | 1  | 0    | 0.02 |
| NSCAC_1204 | ybbJ | conserved hypothetical protein; putative inner membrane protein        | 53.9 | 193.4 | 25.7 | 54.4 | 1  | 0    | 0    |
| NSCAC_1422 | murE | UDP-N-acetylmuramoyl-L-alanyl-D-glutamate--2,6-di aminopimelate ligase | 53.9 | 68.6  | 14   | 5.6  | 0  | 0.8  | 0.9  |
| NSCAC_1458 | yicC | conserved hypothetical protein                                         | 53.7 | 97.4  | 13.8 | 27.6 | 0  | 0.16 | 0.37 |
| NSCAC_1756 | argH | Argininosuccinate lyase                                                | 53.6 | 68.9  | 12.5 | 2.4  | 0  | 0.8  | 0.9  |
| NSCAC_0721 |      | ATP/GTP-binding protein                                                | 53.6 | 69.4  | 8.1  | 16.8 | 0  | 0.85 | 0.92 |
| NSCAC_0805 |      | HAD-superfamily hydrolase, subfamily IB                                | 53.5 | 92    | 17.2 | 7.9  | 0  | 0.28 | 0.52 |

|            |      |                                                                           |      |       |      |      |    |      |      |
|------------|------|---------------------------------------------------------------------------|------|-------|------|------|----|------|------|
| NSCAC_1060 |      | conserved membrane protein of unknown function                            | 53.4 | 91.2  | 19.5 | 15.7 | 0  | 0.28 | 0.51 |
| NSCAC_1281 | serB | Phosphoserine phosphatase                                                 | 53.3 | 89.8  | 24.1 | 40.8 | 0  | 0.39 | 0.62 |
| NSCAC_1188 | bamE | Outer membrane protein assembly factor BamE                               | 53.2 | 90.5  | 17.7 | 55   | 0  | 0.46 | 0.68 |
| NSCAC_1092 |      | putative Fatty acid desaturase                                            | 53   | 65.6  | 22.4 | 6.4  | 0  | 0.72 | 0.85 |
| NSCAC_1385 | speE | Spermidine synthase                                                       | 52.7 | 54.2  | 15.3 | 2    | 0  | 0.24 | 0.47 |
| NSCAC_0653 |      | protein of unknown function                                               | 52.7 | 74.4  | 21.1 | 11.5 | 0  | 0.8  | 0.9  |
| NSCAC_0385 |      | Polysaccharide biosynthesis protein CapD                                  | 52.6 | 78.7  | 14.4 | 27.8 | 0  | 0.67 | 0.82 |
| NSCAC_0982 |      | putative enzyme                                                           | 52.5 | 81.9  | 11.7 | 36.8 | 0  | 0.68 | 0.82 |
| NSCAC_0318 |      | conserved protein of unknown function                                     | 52.4 | 94.8  | 32.3 | 42.7 | 0  | 0.53 | 0.73 |
| NSCAC_1512 | ybeA | conserved hypothetical protein                                            | 52.4 | 108.1 | 19.3 | 22.5 | 1  | 0.09 | 0.23 |
| NSCAC_1029 | arsH | NADPH-dependent FMN reductase                                             | 52.2 | 119.9 | 18.9 | 19.2 | 1  | 0.06 | 0.17 |
| NSCAC_0765 |      | putative Membrane protein                                                 | 52.1 | 89.5  | 5.2  | 7.5  | 0  | 0.23 | 0.46 |
| NSCAC_0313 |      | conserved membrane protein of unknown function                            | 52.1 | 70.2  | 17.7 | 4.6  | 0  | 0.95 | 0.98 |
| NSCAC_0025 | rpsU | 30S ribosomal protein S21                                                 | 52   | 53.3  | 15.1 | 24.2 | 0  | 0.37 | 0.61 |
| NSCAC_0952 |      | conserved protein of unknown function                                     | 52   | 64.7  | 13.6 | 21   | 0  | 0.73 | 0.86 |
| NSCAC_0086 |      | conserved hypothetical protein                                            | 51.9 | 147.5 | 34.2 | 42.7 | 1  | 0.01 | 0.04 |
| NSCAC_0509 |      | Glycosyl transferase family 2                                             | 51.9 | 90.1  | 15.7 | 14   | 0  | 0.24 | 0.46 |
| NSCAC_0659 |      | Alpha/beta hydrolase fold hydrolase or acyltransferase                    | 51.7 | 87.3  | 0.9  | 15.7 | 0  | 0.26 | 0.49 |
| NSCAC_1503 | mutM | formamidopyrimidine/5-formyluracil/ 5-hydroxymethyluracil DNA glycosylase | 51.3 | 97.1  | 4.3  | 23.3 | 0  | 0.09 | 0.25 |
| NSCAC_1193 | recJ | Single-stranded-DNA-specific exonuclease RecJ                             | 51.3 | 60.9  | 13.5 | 12.8 | 0  | 0.64 | 0.8  |
| NSCAC_0606 |      | Iron permease FTR1                                                        | 51.2 | 80.6  | 14.4 | 14   | 0  | 0.44 | 0.66 |
| NSCAC_1513 | ybeB | hypothetical protein                                                      | 51.1 | 63.3  | 27.1 | 57.9 | 0  | 0.69 | 0.83 |
| NSCAC_1315 | rmlB | dTDP-D-glucose-4,6-dehydratase                                            | 51.1 | 62.5  | 9.2  | 12.5 | 0  | 0.6  | 0.77 |
| NSCAC_0303 | nudE | ADP compounds hydrolase NudE                                              | 51   | 136.8 | 15.9 | 17   | 1  | 0    | 0    |
| NSCAC_0977 |      | UvrD/REP helicase                                                         | 51   | 58.2  | 14.3 | 5.7  | 0  | 0.43 | 0.66 |
| NSCAC_1228 |      | protein of unknown function                                               | 50.9 | 82.8  | 4.2  | 13.3 | 0  | 0.39 | 0.62 |
| NSCAC_0194 | mak  | Mannofructokinase                                                         | 50.9 | 49.3  | 14.2 | 11.9 | 0  | 0.17 | 0.38 |
| NSCAC_1658 |      | conserved exported protein of unknown function                            | 50.8 | 39.2  | 19.9 | 4.5  | -1 | 0.05 | 0.16 |
| NSCAC_0024 | gcp  | O-sialoglycoprotein endopeptidase                                         | 50.8 | 61.2  | 24.2 | 9.7  | 0  | 0.61 | 0.78 |
| NSCAC_1050 | yceF | hypothetical protein                                                      | 50.7 | 153.8 | 42.3 | 44.3 | 1  | 0.01 | 0.04 |

|            |      |                                                                                      |      |       |      |       |    |      |      |
|------------|------|--------------------------------------------------------------------------------------|------|-------|------|-------|----|------|------|
| NSCAC_1543 | rsmJ | Ribosomal RNA small subunit methyltransferase J                                      | 50.7 | 51.2  | 4.9  | 7.5   | 0  | 0.2  | 0.42 |
| NSCAC_0268 | pyrB | Aspartate carbamoyltransferase                                                       | 50.7 | 101.2 | 13.1 | 10.7  | 1  | 0.03 | 0.1  |
| NSCAC_0489 | ybbA | putative transporter subunit: ATP-binding component of ABC superfamily               | 50.6 | 40.3  | 24.7 | 15    | -1 | 0.08 | 0.21 |
| NSCAC_1585 | yhbJ | hypothetical protein; putative nucleoside triphosphate hydrolase domain              | 50.3 | 92.9  | 19.3 | 19.7  | 0  | 0.3  | 0.53 |
| NSCAC_1321 | yhhF | putative methyltransferase                                                           | 50.1 | 89.8  | 15.3 | 5.5   | 0  | 0.24 | 0.46 |
| NSCAC_0749 |      | ABC transporter related protein                                                      | 50.1 | 54.8  | 15   | 12.4  | 0  | 0.35 | 0.59 |
| NSCAC_1166 | nagZ | Beta-hexosaminidase                                                                  | 50   | 73.5  | 5.1  | 12.6  | 0  | 0.67 | 0.82 |
| NSCAC_0811 |      | membrane protein of unknown function                                                 | 49.8 | 98.4  | 11.1 | 33.6  | 1  | 0.07 | 0.21 |
| NSCAC_1240 |      | transposase (fragment)                                                               | 49.6 | 172.1 | 14   | 38.5  | 1  | 0    | 0    |
| NSCAC_1383 |      | Glycosyl transferase family 9                                                        | 49.4 | 66.3  | 5    | 18.6  | 0  | 0.93 | 0.97 |
| NSCAC_1346 |      | Polysaccharide chain length determinant protein, PEP-CTERM locus subfamily           | 49.3 | 107   | 6.6  | 37.8  | 1  | 0.03 | 0.1  |
| NSCAC_1472 |      | conserved protein of unknown function                                                | 49.2 | 19.7  | 20.6 | 10.6  | -2 | 0    | 0.02 |
| NSCAC_0709 |      | putative C4-dicarboxylate transporter protein                                        | 49.2 | 41    | 4.9  | 3.3   | -1 | 0.04 | 0.12 |
| NSCAC_0875 | apt  | Adenine phosphoribosyltransferase                                                    | 48.6 | 82.7  | 29.8 | 26.3  | 0  | 0.47 | 0.68 |
| NSCAC_0249 | rldD | 23S rRNA pseudouridine synthase                                                      | 48.6 | 88.8  | 33.9 | 22.3  | 1  | 0.31 | 0.54 |
| NSCAC_0539 | cysS | cysteinyl-tRNA synthetase                                                            | 48.5 | 91.2  | 16.9 | 18.6  | 0  | 0.18 | 0.39 |
| NSCAC_0411 |      | conserved protein of unknown function                                                | 48.4 | 124.6 | 22.1 | 89    | 1  | 0.06 | 0.19 |
| NSCAC_1679 | ruvA | component of RuvABC resolvosome, regulatory subunit                                  | 48.4 | 50.8  | 17.2 | 11.6  | 0  | 0.39 | 0.62 |
| NSCAC_1691 | yggS | putative enzyme                                                                      | 48.3 | 116   | 33.4 | 18.9  | 1  | 0.05 | 0.16 |
| NSCAC_1291 |      | NlpB/DapX lipoprotein                                                                | 48.3 | 84.5  | 12.9 | 36.5  | 0  | 0.32 | 0.55 |
| NSCAC_0549 | relA | GTP pyrophosphokinase                                                                | 48.2 | 69.6  | 18.3 | 14.4  | 0  | 0.75 | 0.87 |
| NSCAC_1524 |      | DNA internalization-related competence protein ComEC/Rec2                            | 48.2 | 55.2  | 4    | 14.3  | 0  | 0.5  | 0.71 |
| NSCAC_1386 | speA | Biosynthetic arginine decarboxylase                                                  | 48.1 | 64.6  | 4.6  | 9.6   | 0  | 0.96 | 0.98 |
| NSCAC_0273 |      | conserved protein of unknown function                                                | 48.1 | 77.5  | 15   | 5.4   | 0  | 0.35 | 0.58 |
| NSCAC_0508 |      | conserved protein of unknown function                                                | 48.1 | 51.6  | 14.8 | 13.8  | 0  | 0.37 | 0.6  |
| NSCAC_1698 | algC | Phosphomannomutase/phosphoglucomutase                                                | 48   | 115.6 | 10.4 | 28.3  | 1  | 0    | 0.01 |
| NSCAC_0064 |      | Type IV pilus assembly protein PilM                                                  | 47.9 | 100   | 2.4  | 28.4  | 1  | 0.05 | 0.16 |
| NSCAC_1590 |      | CHRD domain containing protein (fragment)                                            | 47.8 | 352.5 | 11.4 | 154.2 | 2  | 0    | 0    |
| NSCAC_1666 | yliA | putative peptide transport fused subunits of ABC superfamily: ATP-binding components | 47.7 | 65.6  | 3.4  | 8.5   | 0  | 0.94 | 0.98 |

|            |      |                                                                                                                          |      |        |      |       |    |      |      |
|------------|------|--------------------------------------------------------------------------------------------------------------------------|------|--------|------|-------|----|------|------|
| NSCAC_1332 |      | Polysaccharide deacetylase                                                                                               | 47.7 | 71.2   | 20.3 | 21.1  | 0  | 0.64 | 0.8  |
| NSCAC_0685 |      | conserved protein of unknown function                                                                                    | 47.5 | 60.2   | 13.3 | 9.3   | 0  | 0.73 | 0.86 |
| NSCAC_0722 | stiP | Cysteine protease StiP                                                                                                   | 47.5 | 57.3   | 14.7 | 9.4   | 0  | 0.6  | 0.77 |
| NSCAC_1567 | hisC | Histidinol-phosphate aminotransferase                                                                                    | 47.5 | 79.1   | 25.1 | 5.7   | 0  | 0.39 | 0.62 |
| NSCAC_0020 |      | 2-amino-4-hydroxy-6-hydroxymethyl-dihydropteridine pyrophosphokinase                                                     | 47.5 | 63.1   | 15.9 | 31.1  | 0  | 0.92 | 0.97 |
| NSCAC_0043 | crcB | Protein CrcB homolog                                                                                                     | 47.5 | 90.5   | 13.7 | 11.2  | 0  | 0.11 | 0.28 |
| NSCAC_0282 | mutL | DNA mismatch repair protein MutL                                                                                         | 47.4 | 83.2   | 5.8  | 2.3   | 0  | 0.17 | 0.38 |
| NSCAC_0294 | orn  | oligoribonuclease                                                                                                        | 47.1 | 79     | 8.8  | 7.3   | 0  | 0.25 | 0.48 |
| NSCAC_1479 | epmA | Elongation factor P--(R)-beta-lysine ligase                                                                              | 47.1 | 88.7   | 28   | 19    | 1  | 0.23 | 0.46 |
| NSCAC_0063 | mrcA | fused penicillin-binding protein 1a: murein transglycosylase ; murein transpeptidase                                     | 46.9 | 81.4   | 4    | 28.6  | 0  | 0.31 | 0.54 |
| NSCAC_1246 | rnc  | RNase III                                                                                                                | 46.7 | 72.2   | 4    | 16.7  | 0  | 0.49 | 0.71 |
| NSCAC_0055 | ybeY | putative metal-dependent hydrolase                                                                                       | 46.5 | 52.7   | 5    | 12.8  | 0  | 0.4  | 0.64 |
| NSCAC_0831 | rsxE | putative inner membrane NADH-quinone reductase                                                                           | 46.4 | 63.1   | 18.3 | 12.5  | 0  | 0.91 | 0.96 |
| NSCAC_0936 |      | DNA/RNA non-specific endonuclease                                                                                        | 46.1 | 74     | 29.9 | 9.3   | 0  | 0.51 | 0.72 |
| NSCAC_0486 |      | TonB-dependent receptor                                                                                                  | 45.9 | 52.4   | 6.6  | 4.3   | 0  | 0.46 | 0.68 |
| NSCAC_1440 | yhdG | Uncharacterized amino acid permease YhdG                                                                                 | 45.8 | 39.9   | 7    | 7.4   | -1 | 0.08 | 0.22 |
| NSCAC_0443 |      | NnrS protein                                                                                                             | 45.7 | 97.2   | 10.5 | 5.6   | 1  | 0.01 | 0.06 |
| NSCAC_0961 |      | AMP-dependent synthetase and ligase                                                                                      | 45.6 | 56.2   | 9.2  | 10.1  | 0  | 0.63 | 0.79 |
| NSCAC_1582 | rpoN | RNA polymerase, sigma 54 (sigma N) factor                                                                                | 45.6 | 59.8   | 12.2 | 16.5  | 0  | 0.86 | 0.93 |
| NSCAC_0380 | cysB | HTH-type transcriptional regulator CysB                                                                                  | 45.6 | 99.3   | 21   | 11.6  | 1  | 0.03 | 0.11 |
| NSCAC_0224 | aroE | Shikimate dehydrogenase                                                                                                  | 45.5 | 82.4   | 14.3 | 3.6   | 0  | 0.24 | 0.46 |
| NSCAC_0598 |      | conserved exported protein of unknown function                                                                           | 45.5 | 1091.7 | 10   | 349.8 | 4  | 0    | 0    |
| NSCAC_0511 | fcl  | GDP-L-fucose synthase                                                                                                    | 45.4 | 70.6   | 14.2 | 22.9  | 0  | 0.59 | 0.77 |
| NSCAC_1606 |      | conserved protein of unknown function                                                                                    | 45.3 | 83.2   | 13.7 | 16.8  | 0  | 0.28 | 0.51 |
| NSCAC_1358 |      | conserved protein of unknown function                                                                                    | 45.1 | 95.9   | 15.5 | 21.7  | 1  | 0.12 | 0.29 |
| NSCAC_1525 | msbA | fused lipid transporter subunits of ABC superfamily: membrane component ; ATP-binding component                          | 45.1 | 66.3   | 22.3 | 10.7  | 0  | 0.66 | 0.81 |
| NSCAC_1463 | macB | fragment of fused macrolide transporter subunits of ABC superfamily: ATP-binding component ; membrane component (part 2) | 45   | 77.1   | 8.1  | 8.3   | 0  | 0.28 | 0.51 |
| NSCAC_1579 |      | conserved protein of unknown function                                                                                    | 44.9 | 119.6  | 37.4 | 19.4  | 1  | 0.02 | 0.09 |



|            |      |                                                                                              |      |       |      |      |    |      |      |
|------------|------|----------------------------------------------------------------------------------------------|------|-------|------|------|----|------|------|
| NSCAC_1696 | pyrE | orotate phosphoribosyltransferase                                                            | 44.9 | 103.9 | 15.8 | 23.3 | 1  | 0.02 | 0.09 |
| NSCAC_1431 | yraO | DnaA initiator-associating factor for replication initiation                                 | 44.8 | 67.2  | 22.5 | 21.4 | 0  | 0.63 | 0.79 |
| NSCAC_1372 |      | putative Fatty acid desaturase                                                               | 44.8 | 96.3  | 29.9 | 31.7 | 1  | 0.1  | 0.26 |
| NSCAC_1445 | bioD | dethiobiotin synthetase                                                                      | 44.1 | 30.2  | 12   | 12.3 | -1 | 0.02 | 0.07 |
| NSCAC_1167 |      | ErfK/YbiS/YcfS/YnhG family protein                                                           | 44   | 18.1  | 40.1 | 17.9 | -2 | 0.11 | 0.28 |
| NSCAC_1376 |      | conserved protein of unknown function                                                        | 43.9 | 42.2  | 11.4 | 15.4 | 0  | 0.28 | 0.51 |
| NSCAC_0088 |      | protein of unknown function                                                                  | 43.8 | 43.9  | 38   | 21.7 | 0  | 0.8  | 0.9  |
| NSCAC_1584 |      | HPr kinase                                                                                   | 43.8 | 96    | 19.5 | 21.2 | 1  | 0.12 | 0.3  |
| NSCAC_1245 | era  | membrane-associated, 16S rRNA-binding GTPase                                                 | 43.8 | 67.6  | 27.7 | 33.3 | 0  | 0.67 | 0.82 |
| NSCAC_0111 |      | Fimbrial assembly family protein                                                             | 43.8 | 110.1 | 15   | 6.5  | 1  | 0.01 | 0.06 |
| NSCAC_0833 | rsxD | putative inner membrane oxidoreductase                                                       | 43.7 | 47.9  | 9.5  | 12.9 | 0  | 0.45 | 0.67 |
| NSCAC_0602 | czcA | Cation efflux system protein CzcA                                                            | 43.6 | 59.7  | 5.6  | 11.3 | 0  | 0.95 | 0.98 |
| NSCAC_1429 |      | LppC family lipoprotein                                                                      | 43.6 | 41.8  | 7    | 7.8  | -1 | 0.12 | 0.29 |
| NSCAC_0472 |      | ABC transporter, ATPase component                                                            | 43.5 | 66.2  | 7.6  | 17.9 | 0  | 0.59 | 0.77 |
| NSCAC_0490 | tesA | Esterase TesA                                                                                | 43.4 | 72.1  | 14   | 12.2 | 0  | 0.32 | 0.55 |
| NSCAC_0662 | lpxB | Lipid-A-disaccharide synthase                                                                | 43.3 | 56.6  | 12.2 | 3.9  | 0  | 0.91 | 0.97 |
| NSCAC_0751 | yfhQ | putative methyltransferase                                                                   | 43.2 | 33.9  | 8.3  | 3.4  | -1 | 0.03 | 0.11 |
| NSCAC_1063 | trmB | tRNA (guanine-N(7)-)-methyltransferase                                                       | 43.2 | 49.9  | 13.5 | 9.3  | 0  | 0.51 | 0.72 |
| NSCAC_0686 | alkB | oxidative demethylase of N1-methyladenine or N3-methylcytosine DNA lesions                   | 43   | 101.8 | 19.9 | 40.7 | 1  | 0.04 | 0.14 |
| NSCAC_1033 | yebL | putative metal-binding hydrolase                                                             | 43   | 49.4  | 14.3 | 22.5 | 0  | 0.65 | 0.81 |
| NSCAC_0576 | rbfA | Ribosome-binding factor A                                                                    | 42.7 | 49.3  | 26   | 19.3 | 0  | 0.62 | 0.78 |
| NSCAC_0418 | ribF | Riboflavin biosynthesis protein RibF [Includes: Riboflavin kinase ; FMN adenylyltransferase] | 42.6 | 59.5  | 7.4  | 8.1  | 0  | 0.89 | 0.95 |
| NSCAC_1313 | rmlC | dTDP-4-deoxyrhamnose-3,5-epimerase                                                           | 42.6 | 77    | 32.8 | 34.1 | 0  | 0.36 | 0.6  |
| NSCAC_0150 | qacF | Quaternary ammonium compound-resistance protein QacF                                         | 42.5 | 97.9  | 38.4 | 54.3 | 1  | 0.18 | 0.4  |
| NSCAC_0191 |      | L-lysine 6-oxidase (fragment)                                                                | 42.5 | 58.8  | 11   | 6.6  | 0  | 0.99 | 0.99 |
| NSCAC_1423 | ftsI | transpeptidase involved in septal peptidoglycan synthesis (penicillin-binding protein 3)     | 42.4 | 91.5  | 2.2  | 4    | 1  | 0.01 | 0.05 |
| NSCAC_0999 |      | protein of unknown function                                                                  | 42.3 | 96.4  | 13.3 | 5.9  | 1  | 0.01 | 0.04 |
| NSCAC_0874 |      | protein of unknown function                                                                  | 42.1 | 8.6   | 21.8 | 14.9 | -3 | 0.24 | 0.46 |
| NSCAC_1352 | rep  | DNA helicase and single-stranded DNA-dependent ATPase                                        | 42.1 | 70.5  | 11.5 | 10.9 | 0  | 0.4  | 0.63 |

|            |      |                                                                       |      |       |      |      |    |      |      |
|------------|------|-----------------------------------------------------------------------|------|-------|------|------|----|------|------|
| NSCAC_1354 |      | conserved protein of unknown function                                 | 42   | 116.3 | 19.4 | 56.5 | 1  | 0.01 | 0.05 |
| NSCAC_0300 | lolA | Outer-membrane lipoprotein carrier protein                            | 42   | 70.6  | 32.2 | 19.2 | 0  | 0.49 | 0.7  |
| NSCAC_0133 |      | LysM domain protein (modular protein)                                 | 42   | 55.5  | 16.9 | 13.2 | 0  | 0.97 | 0.99 |
| NSCAC_0283 |      | exported protein of unknown function                                  | 42   | 69.2  | 9.7  | 13.7 | 0  | 0.45 | 0.67 |
| NSCAC_0710 |      | Outer membrane protein                                                | 41.9 | 74.8  | 14.1 | 17.1 | 0  | 0.18 | 0.4  |
| NSCAC_1144 |      | Peptidase propeptide and YPEB domain protein                          | 41.9 | 86.8  | 21.8 | 35.9 | 1  | 0.13 | 0.32 |
| NSCAC_0532 |      | Methylated-DNA/protein-cysteine methyltransferase                     | 41.7 | 116.1 | 24.3 | 22.7 | 1  | 0.01 | 0.03 |
| NSCAC_1457 | gmk  | guanylate kinase                                                      | 41.7 | 90.4  | 8.3  | 20.1 | 1  | 0.05 | 0.15 |
| NSCAC_0444 |      | conserved protein of unknown function                                 | 41.7 | 93.8  | 12.5 | 13   | 1  | 0.04 | 0.14 |
| NSCAC_0908 |      | Type 4 fimbrial biogenesis protein PilZ                               | 41.7 | 75    | 36.6 | 17.8 | 0  | 0.74 | 0.86 |
| NSCAC_0417 | xseB | Exodeoxyribonuclease 7 small subunit                                  | 41.4 | 27.1  | 41.8 | 15.6 | -1 | 0.37 | 0.6  |
| NSCAC_0120 |      | ABC transporter, ATPase subunit                                       | 41.1 | 27.7  | 10.8 | 3.4  | -1 | 0.01 | 0.06 |
| NSCAC_0965 |      | Abortive infection protein                                            | 40.9 | 94.3  | 10.6 | 35   | 1  | 0.03 | 0.11 |
| NSCAC_0311 | pstB | high-affinity phosphate transport protein (ABC superfamily, atp_bind) | 40.4 | 58.2  | 17.2 | 11.4 | 0  | 0.8  | 0.9  |
| NSCAC_0288 |      | BNR/Asp-box repeat domain protein                                     | 40   | 30.1  | 15.8 | 8.7  | -1 | 0.08 | 0.23 |
| NSCAC_1195 |      | conserved exported protein of unknown function                        | 39.8 | 63.9  | 8.1  | 25.7 | 0  | 0.52 | 0.72 |
| NSCAC_0847 |      | conserved protein of unknown function                                 | 39.7 | 71.6  | 11.2 | 37.5 | 0  | 0.34 | 0.57 |
| NSCAC_0306 |      | Phosphate-selective porin O and P                                     | 39.7 | 104.7 | 9.7  | 10   | 1  | 0    | 0.02 |
| NSCAC_0832 | rsxG | putative oxidoreductase                                               | 39.6 | 17.7  | 17.5 | 13.3 | -2 | 0.02 | 0.07 |
| NSCAC_0505 |      | ABC transporter                                                       | 39.3 | 53.9  | 8.8  | 19.6 | 0  | 0.99 | 0.99 |
| NSCAC_1112 | tyrS | Tyrosine--tRNA ligase                                                 | 39.1 | 58.8  | 10.9 | 21.4 | 0  | 0.76 | 0.87 |
| NSCAC_0122 |      | Transferase hexapeptide repeat containing protein                     | 39.1 | 47.2  | 23.8 | 13   | 0  | 0.7  | 0.84 |
| NSCAC_1674 |      | Cell division and transport-associated protein TolA                   | 39   | 93.2  | 5.9  | 10.4 | 1  | 0    | 0.02 |
| NSCAC_1623 | miaA | delta(2)-isopentenylpyrophosphate tRNA-adenosine transferase          | 38.7 | 34.3  | 15.7 | 4.4  | -1 | 0.17 | 0.39 |
| NSCAC_0997 |      | conserved protein of unknown function                                 | 38.7 | 64.1  | 14.5 | 2.3  | 0  | 0.53 | 0.73 |
| NSCAC_1236 | yggW | putative oxidoreductase                                               | 38.6 | 79.5  | 18   | 20.7 | 1  | 0.24 | 0.46 |
| NSCAC_1587 | ptsH | Phosphocarrier protein HPr                                            | 38.4 | 66.8  | 19   | 7.9  | 0  | 0.3  | 0.53 |
| NSCAC_0632 | valS | valyl-tRNA synthetase                                                 | 38.4 | 43.5  | 3.5  | 3.5  | 0  | 0.44 | 0.66 |
| NSCAC_0791 | dnaE | DNA polymerase III alpha subunit                                      | 38.3 | 47.3  | 8.7  | 10.1 | 0  | 0.7  | 0.84 |
| NSCAC_1615 | moeB | Molybdopterin-synthase adenylyltransferase                            | 38.3 | 55.2  | 20.1 | 16.6 | 0  | 0.76 | 0.87 |
| NSCAC_0654 |      | conserved membrane protein of unknown function                        | 38.1 | 38.4  | 20.1 | 2.8  | 0  | 0.39 | 0.63 |

|            |            |                                                                                       |      |       |      |      |    |      |      |
|------------|------------|---------------------------------------------------------------------------------------|------|-------|------|------|----|------|------|
| NSCAC_0868 | metR       | HTH-type transcriptional regulator MetR                                               | 37.9 | 42    | 2.4  | 7.1  | 0  | 0.41 | 0.64 |
| NSCAC_1369 | bioA       | Adenosylmethionine-8-amino-7-oxononanoate aminotransferase                            | 37.9 | 108.3 | 15.5 | 11   | 1  | 0    | 0    |
| NSCAC_0062 |            | conserved protein of unknown function                                                 | 37.8 | 55.4  | 25.1 | 5.4  | 0  | 0.93 | 0.97 |
| NSCAC_0660 |            | Oxidoreductase domain protein                                                         | 37.8 | 73.9  | 32.4 | 18.1 | 1  | 0.25 | 0.47 |
| NSCAC_0607 |            | conserved membrane protein of unknown function                                        | 37.5 | 57    | 42.3 | 9.1  | 0  | 0.97 | 0.99 |
| NSCAC_1331 |            | putative Cellulose biosynthesis-like protein                                          | 37.3 | 69.5  | 17.6 | 34   | 0  | 0.38 | 0.61 |
| NSCAC_1608 |            | exported protein of unknown function                                                  | 36.8 | 40.3  | 12.7 | 18.5 | 0  | 0.59 | 0.77 |
| NSCAC_1059 |            | conserved exported protein of unknown function                                        | 36.6 | 48.5  | 21.6 | 16.6 | 0  | 0.84 | 0.92 |
| NSCAC_1393 |            | conserved protein of unknown function                                                 | 36.5 | 34.6  | 14.5 | 17.4 | -1 | 0.37 | 0.6  |
| NSCAC_1237 |            | protein of unknown function                                                           | 36.4 | 31.9  | 39.1 | 28.2 | -1 | 0.6  | 0.77 |
| NSCAC_0121 |            | conserved protein of unknown function                                                 | 36.3 | 54.2  | 9.7  | 28.1 | 0  | 0.74 | 0.86 |
| NSCAC_0262 | ccrMI<br>M | Modification methylase CcrMI                                                          | 36.2 | 72.3  | 3.5  | 10.2 | 1  | 0.08 | 0.22 |
| NSCAC_1032 |            | conserved protein of unknown function                                                 | 36.1 | 169.5 | 14.7 | 28.5 | 2  | 0    | 0    |
| NSCAC_0517 | lspA       | prolipoprotein signal peptidase (signal peptidase II)                                 | 36   | 54.6  | 14.1 | 30   | 0  | 0.74 | 0.86 |
| NSCAC_1366 |            | exported protein of unknown function                                                  | 35.6 | 50.5  | 8.6  | 11   | 0  | 0.82 | 0.91 |
| NSCAC_1312 | rmlD       | dTDP-4-dehydrorhamnose reductase subunit, NAD(P)-binding, of dTDP-L-rhamnose synthase | 35.4 | 65.5  | 7.1  | 11.2 | 0  | 0.15 | 0.35 |
| NSCAC_1016 |            | conserved protein of unknown function                                                 | 35.3 | 36.1  | 9.1  | 27   | 0  | 0.56 | 0.74 |
| NSCAC_0676 |            | protein of unknown function                                                           | 35.2 | 29.8  | 24.4 | 17.7 | -1 | 0.3  | 0.53 |
| NSCAC_1690 | pilT       | twitching motility protein                                                            | 35.2 | 37.3  | 11.6 | 7.7  | 0  | 0.4  | 0.64 |
| NSCAC_0601 |            | conserved membrane protein of unknown function                                        | 35.2 | 63.2  | 8    | 6.7  | 0  | 0.29 | 0.52 |
| NSCAC_1541 |            | Exodeoxyribonuclease III                                                              | 34.7 | 62    | 24.9 | 22.9 | 0  | 0.45 | 0.67 |
| NSCAC_1085 |            | putative [NiFe]-hydrogenase, small subunit HyfI                                       | 34.6 | 77.2  | 24.2 | 24.9 | 1  | 0.11 | 0.28 |
| NSCAC_1656 | uvrD       | DNA-dependent ATPase I and helicase II                                                | 34.5 | 33.9  | 4.9  | 5.3  | 0  | 0.21 | 0.43 |
| NSCAC_1121 |            | Type IV pilus biogenesis/stability protein PilW                                       | 34.5 | 51.6  | 12.2 | 16.2 | 0  | 0.81 | 0.9  |
| NSCAC_1186 | yfjG       | conserved hypothetical protein                                                        | 34.5 | 65.2  | 9.7  | 30   | 0  | 0.27 | 0.5  |
| NSCAC_0011 | priA       | Primosome factor n' (replication factor Y)                                            | 34.4 | 73.9  | 13.7 | 7    | 1  | 0.09 | 0.23 |
| NSCAC_0612 |            | Hemin-degrading family protein                                                        | 34.4 | 49.1  | 11.5 | 24.3 | 0  | 0.89 | 0.95 |
| NSCAC_0534 |            | conserved protein of unknown function                                                 | 34.4 | 50.6  | 21.1 | 23.4 | 0  | 0.99 | 0.99 |
| NSCAC_0802 | nadC       | quinolinate phosphoribosyltransferase                                                 | 34.4 | 55.9  | 7.7  | 11.4 | 0  | 0.43 | 0.66 |
| NSCAC_1447 | bioH       | Pimeloyl-[acyl-carrier protein] methyl ester esterase                                 | 34.2 | 42.3  | 18.4 | 6.5  | 0  | 0.83 | 0.91 |

|            |           |                                                                                    |      |       |      |      |   |      |      |
|------------|-----------|------------------------------------------------------------------------------------|------|-------|------|------|---|------|------|
| NSCAC_1695 |           | Major facilitator superfamily MFS_1                                                | 34.2 | 48.1  | 18   | 3.6  | 0 | 0.97 | 0.99 |
| NSCAC_1451 |           | Micrococcal nuclease (SNase-like)                                                  | 34.2 | 102.8 | 7.7  | 17.5 | 1 | 0    | 0    |
| NSCAC_0415 |           | 6-carboxy-5,6,7,8-tetrahydropterin synthase                                        | 34.2 | 76.3  | 23.4 | 9    | 1 | 0.22 | 0.44 |
| NSCAC_0319 | bsaA      | Glutathione peroxidase homolog BsaA                                                | 34   | 36.6  | 19.8 | 28.1 | 0 | 0.69 | 0.83 |
| NSCAC_1106 | mutS      | methyl-directed mismatch repair protein                                            | 34   | 34.5  | 4.2  | 4.9  | 0 | 0.3  | 0.53 |
| NSCAC_0154 | rlmB      | 23S rRNA (guanosine-2'-O-)-methyltransferase RlmB                                  | 34   | 50.3  | 13.6 | 3.8  | 0 | 0.78 | 0.89 |
| NSCAC_1578 | kdsC      | 3-deoxy-D-manno-octulosonate 8-phosphate phosphatase                               | 33.8 | 107.3 | 11.7 | 79.6 | 1 | 0.02 | 0.09 |
| NSCAC_0656 |           | ABC transporter, ATP-binding protein                                               | 33.6 | 42.6  | 15.4 | 14.8 | 0 | 0.87 | 0.93 |
| NSCAC_1187 | yfjF      | hypothetical protein                                                               | 33.5 | 60.1  | 17.5 | 11.3 | 0 | 0.4  | 0.63 |
| NSCAC_0308 |           | Phosphate ABC transporter substrate-binding protein, PhoT family                   | 33.4 | 58.1  | 18.9 | 14.1 | 0 | 0.38 | 0.62 |
| NSCAC_1526 | lpxK      | lipid A 4'kinase                                                                   | 33.4 | 80.7  | 7.6  | 7.4  | 1 | 0.01 | 0.04 |
| NSCAC_0152 |           | Glutaredoxin 2                                                                     | 33.4 | 124.4 | 15.5 | 20.7 | 1 | 0    | 0.01 |
| NSCAC_0482 | ureG      | Urease accessory protein UreG                                                      | 33.3 | 220.1 | 28.7 | 50.3 | 2 | 0    | 0    |
| NSCAC_0988 |           | Putative di-heme cytochrome c                                                      | 33.2 | 53.4  | 2.6  | 10   | 0 | 0.54 | 0.73 |
| NSCAC_0818 | cbbY<br>P | Protein CbbY, plasmid                                                              | 33.2 | 46.6  | 4.4  | 9.5  | 0 | 0.91 | 0.96 |
| NSCAC_0828 | rlmJ      | Ribosomal RNA large subunit methyltransferase J                                    | 33.1 | 63.6  | 17.3 | 10.7 | 1 | 0.24 | 0.46 |
| NSCAC_1310 |           | Aminoglycoside phosphotransferase                                                  | 33   | 58.1  | 7.5  | 16   | 0 | 0.26 | 0.49 |
| NSCAC_0333 |           | Sterol-binding domain protein                                                      | 32.7 | 103   | 14.3 | 36.4 | 1 | 0    | 0.01 |
| NSCAC_1605 | ssb       | Single-stranded DNA-binding protein                                                | 32.6 | 46.4  | 12.8 | 7.6  | 0 | 0.82 | 0.9  |
| NSCAC_0445 |           | Predicted proline hydroxylase                                                      | 32.5 | 65    | 8.2  | 25.9 | 1 | 0.2  | 0.42 |
| NSCAC_0657 |           | Secretion protein HlyD                                                             | 32.5 | 59.9  | 6.7  | 5.3  | 0 | 0.21 | 0.43 |
| NSCAC_1146 |           | ATP-binding region ATPase domain protein                                           | 32.4 | 73.1  | 2.9  | 7    | 1 | 0.02 | 0.08 |
| NSCAC_0729 |           | conserved membrane protein of unknown function                                     | 32.4 | 141.5 | 5.7  | 14.1 | 2 | 0    | 0    |
| NSCAC_1363 |           | Secretion ATPase, PEP-CTERM locus subfamily                                        | 32.4 | 55.9  | 27.6 | 9.4  | 0 | 0.47 | 0.68 |
| NSCAC_1581 |           | putative lipopolysaccharide transport protein B (ABC superfamily, atp_bind) (LptB) | 32.3 | 102.3 | 9.8  | 20.5 | 1 | 0    | 0.01 |
| NSCAC_0799 | ispF      | 2C-methyl-D-erythritol 2,4-cyclodiphosphate synthase                               | 32.3 | 64.4  | 20.4 | 26.3 | 1 | 0.33 | 0.56 |
| NSCAC_0461 | yheS      | fused putative transporter subunits of ABC superfamily: ATP-binding components     | 32   | 61.4  | 4.9  | 1.4  | 0 | 0.14 | 0.34 |
| NSCAC_1053 | surA      | Chaperone SurA                                                                     | 32   | 51.5  | 13.1 | 31   | 0 | 0.61 | 0.78 |
| NSCAC_0253 | ygiD      | putative enzyme                                                                    | 31.6 | 87.1  | 15.6 | 5.3  | 1 | 0    | 0.01 |

|            |            |                                                                                                               |      |       |      |      |    |      |      |
|------------|------------|---------------------------------------------------------------------------------------------------------------|------|-------|------|------|----|------|------|
| NSCAC_0955 |            | BFD domain protein (2Fe-2S)-binding domain protein                                                            | 31.5 | 48.1  | 28.5 | 25.6 | 0  | 0.95 | 0.98 |
| NSCAC_0742 |            | Smr domain protein                                                                                            | 31.5 | 49.8  | 3.1  | 11.1 | 0  | 0.58 | 0.76 |
| NSCAC_0054 | ybeZ       | putative enzyme with nucleoside triphosphate hydrolase domain                                                 | 31.4 | 105.5 | 7.2  | 13.5 | 1  | 0    | 0    |
| NSCAC_1453 | recG       | ATP-dependent DNA helicase                                                                                    | 31.3 | 48.2  | 9.1  | 10.4 | 0  | 0.58 | 0.76 |
| NSCAC_1042 | mboI<br>AM | Modification methylase MboIA                                                                                  | 31.3 | 49.2  | 8.7  | 14.2 | 0  | 0.66 | 0.81 |
| NSCAC_0953 | yjbQ       | conserved hypothetical protein                                                                                | 31.2 | 33.3  | 22.6 | 24.1 | 0  | 0.66 | 0.81 |
| NSCAC_0967 |            | conserved membrane protein of unknown function                                                                | 31.2 | 49.1  | 4.2  | 15.1 | 0  | 0.59 | 0.77 |
| NSCAC_1700 | dfp        | fused 4'-phosphopantothenoylecysteine decarboxylase ;<br>phosphopantothenoylecysteine synthetase, FMN-binding | 31.1 | 59.9  | 14.8 | 15.4 | 1  | 0.2  | 0.42 |
| NSCAC_0286 |            | Type I restriction modification DNA specificity domain protein<br>(fragment)                                  | 31   | 47    | 27   | 8.6  | 0  | 0.96 | 0.98 |
| NSCAC_1603 | uvrA       | Excinuclease ABC, subunit A                                                                                   | 30.9 | 34.4  | 4.8  | 3.8  | 0  | 0.47 | 0.68 |
| NSCAC_1739 |            | conserved protein of unknown function                                                                         | 30.9 | 82.9  | 16.8 | 29.5 | 1  | 0.06 | 0.18 |
| NSCAC_1091 |            | TonB-dependent receptor                                                                                       | 30.8 | 35.9  | 8.1  | 5.2  | 0  | 0.62 | 0.78 |
| NSCAC_0715 |            | Outer membrane efflux protein                                                                                 | 30.8 | 21.6  | 4.5  | 12   | -1 | 0.08 | 0.23 |
| NSCAC_0527 | ffh        | 4.5S-RNP protein, GTP binding export factor, part of signal recognition<br>particle with 4.5 RNA              | 30.6 | 64.6  | 6.7  | 10.1 | 1  | 0.06 | 0.17 |
| NSCAC_1272 | trpD       | Anthranilate phosphoribosyltransferase                                                                        | 30.4 | 85.6  | 2.6  | 14.3 | 1  | 0    | 0    |
| NSCAC_0130 |            | Glycosyl transferase, group 2 family protein                                                                  | 30.4 | 39.6  | 17.3 | 7.6  | 0  | 0.97 | 0.99 |
| NSCAC_0604 |            | Outer membrane efflux protein                                                                                 | 30.3 | 38.5  | 7.9  | 12.5 | 0  | 0.78 | 0.89 |
| NSCAC_0842 |            | protein of unknown function                                                                                   | 30.3 | 54.7  | 14.5 | 5    | 0  | 0.29 | 0.52 |
| NSCAC_1580 |            | Lipopolysaccharide transport periplasmic protein LptA (modular protein)                                       | 30.2 | 63.9  | 12.4 | 44.3 | 1  | 0.25 | 0.47 |
| NSCAC_1461 |            | Efflux transporter, RND family, MFP subunit                                                                   | 30.1 | 33.9  | 12.7 | 9.1  | 0  | 0.57 | 0.76 |
| NSCAC_0008 |            | Formylmethanofuran dehydrogenase, subunit B                                                                   | 29.8 | 85.1  | 6.1  | 12.3 | 1  | 0    | 0.01 |
| NSCAC_0826 |            | conserved protein of unknown function                                                                         | 29.8 | 16.3  | 32.3 | 4.7  | -1 | 0.25 | 0.48 |
| NSCAC_1641 |            | putative TonB-dependent receptor                                                                              | 29.7 | 65.7  | 8.2  | 1.7  | 1  | 0.06 | 0.18 |
| NSCAC_0954 |            | conserved protein of unknown function                                                                         | 29.5 | 29.3  | 20.2 | 14.6 | 0  | 0.53 | 0.73 |
| NSCAC_0945 |            | putative Phosphate-selective porin O and P                                                                    | 29.4 | 55.1  | 6.8  | 10.8 | 0  | 0.29 | 0.52 |
| NSCAC_0164 |            | Peptidase M48 Ste24p                                                                                          | 29.3 | 79.7  | 9.9  | 24   | 1  | 0.02 | 0.09 |
| NSCAC_0317 |            | Phospholipid/glycerol acyltransferase                                                                         | 29.3 | 38.2  | 5    | 4.7  | 0  | 0.95 | 0.98 |
| NSCAC_0068 |            | Type IV pilus biogenesis protein PilQ                                                                         | 29.1 | 27.3  | 5.8  | 3.6  | -1 | 0.25 | 0.47 |

|            |      |                                                                      |      |       |      |      |    |      |      |
|------------|------|----------------------------------------------------------------------|------|-------|------|------|----|------|------|
| NSCAC_1015 |      | conserved protein of unknown function                                | 28.8 | 44.2  | 10   | 22.8 | 0  | 0.72 | 0.85 |
| NSCAC_1073 |      | conserved protein of unknown function                                | 28.7 | 31.9  | 17.9 | 14.4 | 0  | 0.65 | 0.81 |
| NSCAC_0001 | dnaN | DNA polymerase III subunit beta                                      | 28.6 | 34    | 22.6 | 16   | 0  | 0.84 | 0.92 |
| NSCAC_1357 |      | RimK domain protein ATP-grasp                                        | 28.6 | 55.2  | 8    | 1.1  | 1  | 0.18 | 0.4  |
| NSCAC_0787 |      | conserved protein of unknown function                                | 28.5 | 31.9  | 30.7 | 19.3 | 0  | 0.91 | 0.96 |
| NSCAC_1642 |      | putative TonB-dependent siderophore receptor                         | 28.5 | 59.6  | 1.7  | 6.4  | 1  | 0.07 | 0.2  |
| NSCAC_1301 |      | Periplasmic solute binding protein                                   | 28.5 | 101   | 21.1 | 27.1 | 1  | 0.01 | 0.03 |
| NSCAC_0192 |      | L-lysine 6-oxidase (fragment)                                        | 28.3 | 86    | 11.1 | 25.6 | 1  | 0.01 | 0.05 |
| NSCAC_1760 |      | Transposon Tn7 transposition protein TnsE (fragment)                 | 28.3 | 34    | 15.1 | 10.4 | 0  | 0.73 | 0.86 |
| NSCAC_1104 | ygaD | conserved hypothetical protein                                       | 28.1 | 64.7  | 11.3 | 19.8 | 1  | 0.05 | 0.16 |
| NSCAC_1128 |      | Regulatory protein GntR HTH                                          | 28   | 31.3  | 10.2 | 7.3  | 0  | 0.52 | 0.73 |
| NSCAC_1601 | rsmB | 16S rRNA m5C967 methyltransferase, S-adenosyl-L-methionine-dependent | 28   | 44.8  | 5.6  | 16.9 | 0  | 0.66 | 0.81 |
| NSCAC_1783 | rpmH | 50S ribosomal protein L34                                            | 28   | 31.3  | 48.5 | 23.5 | -1 | NA   | NA   |
| NSCAC_0869 |      | Acid phosphatase                                                     | 27.9 | 61.7  | 2.9  | 17.8 | 1  | 0.08 | 0.22 |
| NSCAC_0193 |      | conserved membrane protein of unknown function                       | 27.9 | 45.6  | 4.4  | 14.2 | 0  | 0.53 | 0.73 |
| NSCAC_0848 |      | conserved protein of unknown function                                | 27.7 | 40.3  | 24.3 | 11.5 | 0  | 0.84 | 0.92 |
| NSCAC_1399 | rluC | 23S rRNA pseudouridylate synthase                                    | 27.6 | 54.1  | 13.6 | 38.6 | 0  | 0.46 | 0.67 |
| NSCAC_0633 |      | conserved membrane protein of unknown function                       | 27.6 | 63.8  | 11.6 | 6.2  | 1  | 0.11 | 0.27 |
| NSCAC_0506 |      | conserved protein of unknown function                                | 27.6 | 46.3  | 2.7  | 9.6  | 0  | 0.45 | 0.67 |
| NSCAC_0015 | grxC | glutaredoxin 3                                                       | 27.3 | 36.6  | 14.1 | 19.9 | 0  | 0.95 | 0.98 |
| NSCAC_0280 |      | protein of unknown function                                          | 27.2 | 14.9  | 25.6 | 16.2 | -1 | 0.44 | 0.67 |
| NSCAC_0550 | hrpA | ATP-dependent RNA helicase HrpA                                      | 27.1 | 28.2  | 2.1  | 6.6  | 0  | 0.39 | 0.62 |
| NSCAC_0830 | nth  | endonuclease III DNA glycosylase/apurimidine (AP) lyase              | 27.1 | 42.3  | 10.7 | 7.1  | 0  | 0.71 | 0.84 |
| NSCAC_0759 |      | protein of unknown function                                          | 27   | 105.2 | 18   | 86.9 | 1  | 0.01 | 0.06 |
| NSCAC_1378 |      | Sel1 repeat family protein (fragment)                                | 26.9 | 44.9  | 18.1 | 5.6  | 0  | 0.51 | 0.71 |
| NSCAC_1320 | coaD | pantetheine-phosphate adenylyltransferase                            | 26.8 | 83.7  | 9.6  | 22.5 | 1  | 0.01 | 0.03 |
| NSCAC_0463 | apbE | Thiamine biosynthesis lipoprotein ApbE                               | 26.8 | 47.8  | 8.9  | 17.5 | 0  | 0.36 | 0.59 |
| NSCAC_0087 |      | Stringent starvation protein B                                       | 26.4 | 54.7  | 2.8  | 10.2 | 1  | 0.12 | 0.29 |
| NSCAC_0800 |      | putative Hydrolase, alpha/beta fold family                           | 26.4 | 64.1  | 9.2  | 21   | 1  | 0.04 | 0.13 |
| NSCAC_0958 | smc  | Chromosome partition protein Smc                                     | 26.3 | 50.8  | 8.9  | 12.8 | 1  | 0.19 | 0.4  |

|            |      |                                                                                    |      |       |      |      |    |      |      |
|------------|------|------------------------------------------------------------------------------------|------|-------|------|------|----|------|------|
| NSCAC_1388 | polA | fused DNA polymerase I 5'->3' exonuclease ; 3'->5' polymerase ; 3'->5' exonuclease | 26.3 | 39.9  | 4    | 7.4  | 0  | 0.7  | 0.84 |
| NSCAC_0420 |      | conserved protein of unknown function                                              | 25.9 | 94.5  | 18.1 | 29.5 | 1  | 0    | 0.01 |
| NSCAC_1013 | uvrB | excinuclease ABC subunit B (ATP-dependent DNA excision repair enzyme UvrAC)        | 25.4 | 45.7  | 9.4  | 1.9  | 0  | 0.26 | 0.49 |
| NSCAC_1230 |      | Guanine-specific ribonuclease N1 and T1                                            | 25.3 | 58.7  | 7.1  | 26.6 | 1  | 0.08 | 0.22 |
| NSCAC_0101 | tapC | Type IV pilus assembly protein TapC                                                | 25.2 | 61.6  | 6.6  | 6.3  | 1  | 0.02 | 0.09 |
| NSCAC_0301 | yidD | hypothetical protein                                                               | 25.2 | 36    | 6.6  | 11.1 | 0  | 0.9  | 0.95 |
| NSCAC_0451 |      | PhoH family protein                                                                | 25.2 | 38.6  | 7.9  | 18.3 | 0  | 0.73 | 0.86 |
| NSCAC_0189 | mutH | DNA mismatch repair protein MutH                                                   | 25.2 | 69.9  | 9.5  | 20.2 | 1  | 0.01 | 0.04 |
| NSCAC_1488 |      | Rare lipoprotein A                                                                 | 25.1 | 42.9  | 21   | 18.6 | 0  | 0.54 | 0.74 |
| NSCAC_0524 | mutY | A/G-specific adenine glycosylase                                                   | 25   | 39    | 3.1  | 7.2  | 0  | 0.57 | 0.75 |
| NSCAC_0623 |      | putative VTC domain-containing protein                                             | 24.9 | 80.8  | 6.3  | 23.1 | 1  | 0    | 0.01 |
| NSCAC_1667 |      | protein of unknown function                                                        | 24.7 | 4.3   | 4.4  | 7.4  | -3 | 0.04 | 0.13 |
| NSCAC_0931 |      | protein of unknown function                                                        | 24.7 | 36.1  | 16.4 | 12.8 | 0  | 0.79 | 0.89 |
| NSCAC_1611 |      | protein of unknown function                                                        | 24.6 | 69.4  | 27.8 | 61.8 | 1  | 0.61 | 0.78 |
| NSCAC_0481 | ureF | Urease accessory protein UreF                                                      | 24.5 | 245.1 | 9.6  | 41.3 | 3  | 0    | 0    |
| NSCAC_0947 |      | conserved membrane protein of unknown function                                     | 24.4 | 43.4  | 9.6  | 10.1 | 0  | 0.48 | 0.69 |
| NSCAC_0078 |      | H4MPT-linked C1 transfer pathway protein                                           | 24.3 | 37.8  | 14.9 | 4.3  | 0  | 0.67 | 0.82 |
| NSCAC_0050 | dfrA | Dihydrofolate reductase                                                            | 24.3 | 93.4  | 19.6 | 23.1 | 1  | 0.01 | 0.06 |
| NSCAC_0038 |      | protein of unknown function                                                        | 24.3 | 5.3   | 21.2 | 9.2  | -3 | 0.44 | 0.66 |
| NSCAC_0005 |      | Formylmethanofuran dehydrogenase, subunit C                                        | 24.3 | 37.5  | 4.2  | 5    | 0  | 0.66 | 0.81 |
| NSCAC_0640 |      | CRISPR-associated helicase Cas3 family                                             | 24.2 | 37.1  | 1.8  | 0.9  | 0  | 0.69 | 0.83 |
| NSCAC_0789 | glcF | glycolate oxidase iron-sulfur subunit                                              | 24.1 | 33.7  | 13.1 | 19.4 | 0  | 0.94 | 0.98 |
| NSCAC_0485 |      | Short chain amide porin                                                            | 24.1 | 24.3  | 7.8  | 1.1  | 0  | 0.39 | 0.62 |
| NSCAC_0255 |      | Exopolysaccharide synthesis, ExoD                                                  | 24   | 26    | 22.5 | 10.3 | 0  | 0.76 | 0.87 |
| NSCAC_0184 |      | Methyltransferase type 11                                                          | 24   | 16.9  | 12.9 | 14   | -1 | 0.27 | 0.5  |
| NSCAC_0153 | nfi  | Endonuclease V                                                                     | 24   | 93.4  | 2    | 19.5 | 2  | 0    | 0    |
| NSCAC_1430 |      | conserved protein of unknown function                                              | 24   | 99.5  | 21.1 | 15.8 | 2  | 0.2  | 0.42 |
| NSCAC_1056 | sbcD | exonuclease, dsDNA, ATP-dependent                                                  | 23.9 | 32.9  | 16.9 | 4.8  | 0  | 0.96 | 0.98 |
| NSCAC_0998 |      | protein of unknown function                                                        | 23.9 | 12.5  | 25.3 | 13.2 | -2 | 0.32 | 0.55 |
| NSCAC_0457 | mbol | Modification methylase MboIB                                                       | 23.9 | 38.1  | 8.8  | 3.7  | 0  | 0.57 | 0.75 |

|            | BM   |                                                               |      |      |      |      |    |      |      |
|------------|------|---------------------------------------------------------------|------|------|------|------|----|------|------|
| NSCAC_1379 |      | Sell repeat protein (modular protein)                         | 23.8 | 24.1 | 1.9  | 13.3 | 0  | 0.51 | 0.71 |
| NSCAC_1558 | scpB | Segregation and condensation protein B homolog                | 23.6 | 75.1 | 18.3 | 16.9 | 1  | 0.03 | 0.11 |
| NSCAC_1669 | queC | 7-cyano-7-deazaguanine synthase                               | 23.6 | 83.1 | 14.3 | 4.9  | 1  | 0.01 | 0.04 |
| NSCAC_1374 |      | putative Glycosyl transferase group 1                         | 23.4 | 45   | 18.2 | 13.8 | 1  | 0.38 | 0.61 |
| NSCAC_0123 |      | Glycosyl transferase family 2 (fragment)                      | 23.1 | 42.1 | 6.2  | 10.1 | 0  | 0.35 | 0.58 |
| NSCAC_0388 |      | Peptidase M23                                                 | 22.9 | 71.9 | 20.9 | 14.1 | 1  | 0.12 | 0.3  |
| NSCAC_0441 |      | conserved protein of unknown function                         | 22.8 | 35.6 | 5.9  | 16.2 | 0  | 0.64 | 0.8  |
| NSCAC_1058 |      | conserved membrane protein of unknown function                | 22.6 | 63.4 | 5.8  | 9.8  | 1  | 0    | 0.02 |
| NSCAC_1055 |      | putative Nuclease SbcCD subunit C                             | 22.6 | 37.1 | 5.9  | 9.8  | 0  | 0.54 | 0.74 |
| NSCAC_0717 |      | Integral membrane sensor signal transduction histidine kinase | 22.5 | 61.2 | 20.5 | 14.5 | 1  | 0.12 | 0.29 |
| NSCAC_0738 |      | Permease YjgP/YjgQ family protein                             | 22.5 | 38.5 | 9.6  | 18   | 0  | 0.51 | 0.72 |
| NSCAC_0514 | sfsA | Sugar fermentation stimulation protein homolog                | 22.5 | 51.4 | 1.8  | 6.7  | 1  | 0.06 | 0.18 |
| NSCAC_1043 |      | protein of unknown function                                   | 22.3 | 15.2 | 20.2 | 15.9 | -1 | 0.52 | 0.72 |
| NSCAC_0132 | yjbN | tRNA-dihydrouridine synthase A                                | 22.1 | 44.2 | 4.1  | 8.3  | 1  | 0.17 | 0.38 |
| NSCAC_0978 |      | conserved protein of unknown function                         | 22.1 | 36.6 | 8.2  | 3    | 0  | 0.64 | 0.8  |
| NSCAC_0263 |      | Carboxymuconolactone decarboxylase family protein             | 21.5 | 47   | 18.7 | 17.3 | 1  | 0.3  | 0.53 |
| NSCAC_1360 | argA | Amino-acid acetyltransferase                                  | 21.5 | 38.9 | 19.4 | 9.4  | 0  | 0.53 | 0.73 |
| NSCAC_1392 |      | protein of unknown function                                   | 21.4 | 16.2 | 37   | 16.7 | -1 | 0.84 | 0.92 |
| NSCAC_0809 |      | membrane protein of unknown function                          | 21.2 | 31   | 14   | 14.9 | 0  | 0.83 | 0.91 |
| NSCAC_1072 |      | conserved protein of unknown function                         | 21.1 | 48.1 | 24.1 | 24.5 | 1  | 0.3  | 0.53 |
| NSCAC_0284 |      | protein of unknown function                                   | 21   | 37.5 | 7.3  | 26.2 | 0  | 0.54 | 0.73 |
| NSCAC_0223 |      | conserved protein of unknown function                         | 20.9 | 65   | 24.6 | 63.1 | 1  | 0.43 | 0.66 |
| NSCAC_0912 |      | Aminodeoxychorismate lyase                                    | 20.8 | 65.1 | 13.2 | 17.2 | 1  | 0.01 | 0.06 |
| NSCAC_1633 | aat  | leucyl/phenylalanyl-tRNA-protein transferase                  | 20.8 | 36.7 | 3.7  | 4.8  | 0  | 0.43 | 0.66 |
| NSCAC_0834 | rnfC | Electron transport complex protein RnfC                       | 20.7 | 55.9 | 2.7  | 9.6  | 1  | 0.01 | 0.06 |
| NSCAC_1174 |      | Acriflavin resistance protein                                 | 20.6 | 33   | 5.9  | 6.3  | 0  | 0.62 | 0.79 |
| NSCAC_1514 | nadD | putative nicotinate-nucleotide adenyltransferase              | 20.1 | 26.6 | 10.8 | 10.2 | 0  | 0.97 | 0.99 |
| NSCAC_0631 |      | Auxin Efflux Carrier                                          | 19.9 | 47.2 | 12.8 | 9    | 1  | 0.13 | 0.32 |
| NSCAC_1446 | bioC | Malonyl-[acyl-carrier protein] O-methyltransferase            | 19.8 | 45.7 | 18.8 | 16.8 | 1  | 0.36 | 0.6  |
| NSCAC_0066 |      | Pilus assembly protein PilO                                   | 19.7 | 20.3 | 9.1  | 7.1  | 0  | 0.59 | 0.77 |



|            |      |                                                        |      |       |      |      |    |      |      |
|------------|------|--------------------------------------------------------|------|-------|------|------|----|------|------|
| NSCAC_0149 |      | General secretion pathway protein H (fragment)         | 19.7 | 53.8  | 5.2  | 23.4 | 1  | 0.04 | 0.13 |
| NSCAC_0655 |      | conserved membrane protein of unknown function         | 19.7 | 47    | 4.7  | 14.4 | 1  | 0.09 | 0.24 |
| NSCAC_0096 |      | conserved protein of unknown function                  | 19.6 | 62    | 20.9 | 23.6 | 1  | 0.15 | 0.35 |
| NSCAC_0487 |      | protein of unknown function                            | 19.6 | 42.4  | 11.5 | 11.6 | 1  | 0.33 | 0.57 |
| NSCAC_0637 |      | Bifunctional deaminase-reductase domain protein        | 19.5 | 53.5  | 23.2 | 6.6  | 1  | 0.12 | 0.3  |
| NSCAC_0112 |      | General secretion pathway protein M                    | 19.4 | 87.4  | 8.9  | 21.3 | 2  | 0    | 0    |
| NSCAC_1098 |      | conserved protein of unknown function                  | 19.4 | 34.9  | 6.5  | 10.8 | 0  | 0.44 | 0.67 |
| NSCAC_1645 |      | protein of unknown function                            | 19.2 | 109.8 | 14.9 | 12.2 | 2  | 0    | 0    |
| NSCAC_1559 | scpA | Segregation and condensation protein A                 | 19.2 | 60    | 17.2 | 6.1  | 1  | 0.03 | 0.1  |
| NSCAC_0521 |      | protein of unknown function                            | 19.1 | 75.9  | 12.3 | 9.8  | 2  | 0    | 0.01 |
| NSCAC_1424 | ftsL | Cell division protein FtsL                             | 18.9 | 11.6  | 19.2 | 6.6  | -1 | 0.36 | 0.6  |
| NSCAC_0641 | cas  | CRISPR-associated endonuclease Cas1                    | 18.9 | 44.3  | 5.3  | 2.8  | 1  | 0.06 | 0.18 |
| NSCAC_0750 | queA | S-adenosylmethionine:tRNA ribosyltransferase-isomerase | 18.9 | 27.3  | 7    | 9.2  | 0  | 0.84 | 0.92 |
| NSCAC_0076 |      | Aspartate/glutamate/uridylate kinase                   | 18.8 | 33.4  | 7.9  | 7.5  | 0  | 0.55 | 0.74 |
| NSCAC_1021 |      | protein of unknown function                            | 18.8 | 8.6   | 16.4 | 7.5  | -2 | 0.33 | 0.56 |
| NSCAC_0512 |      | Glycosyl transferase family 2                          | 18.7 | 35.2  | 5.8  | 11.4 | 0  | 0.37 | 0.61 |
| NSCAC_1362 |      | HAD-superfamily subfamily IB, PSPase-like protein      | 18.6 | 47    | 4.9  | 4.8  | 1  | 0.03 | 0.12 |
| NSCAC_1370 |      | protein of unknown function                            | 18.5 | 78.7  | 16.5 | 41.2 | 2  | 0.04 | 0.13 |
| NSCAC_0835 | rsxB | putative iron-sulfur protein                           | 18.3 | 24.5  | 16   | 20.4 | 0  | 1    | 1    |
| NSCAC_1034 |      | conserved protein of unknown function                  | 18   | 40.4  | 6.1  | 9.7  | 1  | 0.17 | 0.39 |
| NSCAC_0507 |      | conserved protein of unknown function                  | 18   | 20.2  | 24.6 | 10.8 | 0  | 0.89 | 0.95 |
| NSCAC_1375 |      | Glycosyl transferase family 9                          | 17.9 | 42.8  | 10.6 | 16.7 | 1  | 0.15 | 0.34 |
| NSCAC_1396 | kdsB | 3-deoxy-manno-octulosonate cytidyltransferase          | 17.8 | 43.4  | 9.3  | 9.1  | 1  | 0.1  | 0.25 |
| NSCAC_0186 |      | protein of unknown function                            | 17.8 | 44.1  | 16.2 | 26.5 | 1  | 0.44 | 0.66 |
| NSCAC_1475 | bamD | Outer membrane protein assembly factor BamD            | 17.8 | 29.4  | 16.9 | 9.5  | 0  | 0.82 | 0.91 |
| NSCAC_0674 |      | protein of unknown function                            | 17.8 | 18.4  | 19   | 10.9 | 0  | 0.81 | 0.9  |
| NSCAC_0316 | trpH | Protein TrpH                                           | 17.8 | 51.8  | 16.6 | 4.8  | 1  | 0.21 | 0.43 |
| NSCAC_0287 |      | Type I restriction enzyme EcoPrrI M protein (fragment) | 17.6 | 6.8   | 15.4 | 0.8  | -2 | 0.21 | 0.43 |
| NSCAC_0289 |      | protein of unknown function                            | 17.6 | 29.3  | 4.4  | 10.8 | 0  | 0.64 | 0.8  |
| NSCAC_1384 |      | Glycosyl transferase group 1                           | 17.5 | 25.8  | 12.4 | 11.2 | 0  | 0.8  | 0.9  |
| NSCAC_0642 |      | conserved protein of unknown function                  | 17.5 | 19.1  | 3.3  | 7.3  | 0  | 0.61 | 0.78 |

|            |       |                                                                          |      |       |      |      |    |      |      |
|------------|-------|--------------------------------------------------------------------------|------|-------|------|------|----|------|------|
| NSCAC_0986 |       | Peptidase S8 and S53 subtilisin kexin sedolisin                          | 17.4 | 35.5  | 10.3 | 9.5  | 1  | 0.29 | 0.52 |
| NSCAC_0129 |       | 3-beta hydroxysteroid dehydrogenase/isomerase family                     | 17.3 | 33.7  | 16.3 | 8.3  | 1  | 0.53 | 0.73 |
| NSCAC_1353 | yifB  | putative bifunctional enzyme and transcriptional regulator               | 17.2 | 39.3  | 3.2  | 0.3  | 1  | 0.1  | 0.25 |
| NSCAC_1071 |       | membrane protein of unknown function                                     | 17.1 | 23.8  | 3    | 5.4  | 0  | 1    | 1    |
| NSCAC_1133 | folK  | 2-amino-4-hydroxy-6-hydroxymethylidihydropteridine pyrophosphokinase     | 16.8 | 38.9  | 15.8 | 9.5  | 1  | 0.34 | 0.58 |
| NSCAC_1314 | rmlA  | dTDP-glucose pyrophosphorylase (glucose-1-phosphate thymidyltransferase) | 16.8 | 26.9  | 9.1  | 9.8  | 0  | 0.63 | 0.79 |
| NSCAC_1535 |       | conserved protein of unknown function                                    | 16.7 | 87.5  | 29   | 26.5 | 2  | 0.36 | 0.6  |
| NSCAC_0697 |       | conserved protein of unknown function                                    | 16.6 | 76.6  | 4.4  | 32.2 | 2  | 0    | 0    |
| NSCAC_1096 | bepIM | Modification methylase BepI                                              | 16.6 | 26.1  | 7.2  | 10.2 | 0  | 0.7  | 0.84 |
| NSCAC_0080 |       | Histidine biosynthesis protein                                           | 16.6 | 64.7  | 7.6  | 15   | 2  | 0    | 0.01 |
| NSCAC_1041 |       | protein of unknown function                                              | 16.6 | 29.2  | 4.4  | 17.2 | 0  | 0.59 | 0.77 |
| NSCAC_0077 | pabB  | Aminodeoxychorismate synthase component 1                                | 16.4 | 40.2  | 8    | 5.6  | 1  | 0.09 | 0.24 |
| NSCAC_1427 | yraL  | putative methyltransferase                                               | 16.3 | 21    | 2.7  | 6.8  | 0  | 0.88 | 0.94 |
| NSCAC_0890 | fumC  | Fumarate hydratase class II                                              | 16.3 | 28.5  | 7.9  | 7.8  | 0  | 0.54 | 0.73 |
| NSCAC_0483 |       | conserved protein of unknown function                                    | 16.3 | 129.3 | 7.7  | 34.9 | 3  | 0    | 0    |
| NSCAC_1660 |       | protein of unknown function                                              | 16.3 | 33.4  | 10.1 | 10.5 | 1  | 0.29 | 0.52 |
| NSCAC_1031 |       | conserved protein of unknown function                                    | 16.2 | 82.3  | 28   | 18.3 | 2  | 0.37 | 0.6  |
| NSCAC_0987 |       | conserved protein of unknown function                                    | 16.1 | 24.3  | 6.8  | 7.6  | 0  | 0.79 | 0.89 |
| NSCAC_0966 |       | conserved protein of unknown function                                    | 16   | 90.9  | 13.9 | 25.8 | 2  | 0.13 | 0.31 |
| NSCAC_0804 |       | putative membrane protein                                                | 16   | 35.5  | 5    | 5.1  | 1  | 0.19 | 0.4  |
| NSCAC_0102 | pilB  | Type 4 fimbrial assembly protein PilB                                    | 16   | 22.5  | 3.4  | 3.9  | 0  | 0.96 | 0.98 |
| NSCAC_0563 |       | conserved protein of unknown function                                    | 15.9 | 34.9  | 6.7  | 8.1  | 1  | 0.23 | 0.46 |
| NSCAC_0603 |       | Efflux transporter, RND family, MFP subunit                              | 15.9 | 19.6  | 3.5  | 4.5  | 0  | 0.79 | 0.89 |
| NSCAC_1534 |       | exported protein of unknown function                                     | 15.4 | 21.8  | 9.3  | 10.7 | 0  | 0.98 | 0.99 |
| NSCAC_0682 |       | HAD-superfamily hydrolase subfamily IA, variant 3                        | 14.9 | 25.7  | 1.6  | 15.8 | 0  | 0.63 | 0.79 |
| NSCAC_1173 |       | RND efflux system, outer membrane lipoprotein, NodT family               | 14.7 | 18.3  | 5.2  | 4.2  | 0  | 0.85 | 0.92 |
| NSCAC_1062 |       | protein of unknown function                                              | 14.7 | 3.8   | 13.3 | 6.6  | -2 | 0.28 | 0.51 |
| NSCAC_0876 |       | conserved protein of unknown function                                    | 14.6 | 55    | 7.2  | 34.1 | 1  | 0.01 | 0.05 |
| NSCAC_0901 | argS  | Arginyl-tRNA synthetase                                                  | 14.5 | 28.6  | 1.9  | 8.1  | 1  | 0.38 | 0.61 |
| NSCAC_1617 | prmC  | Release factor glutamine methyltransferase                               | 14.5 | 21.9  | 1.9  | 5    | 0  | 0.85 | 0.92 |

|            |       |                                                                                                                                                                                               |      |      |      |      |    |      |      |
|------------|-------|-----------------------------------------------------------------------------------------------------------------------------------------------------------------------------------------------|------|------|------|------|----|------|------|
| NSCAC_0716 | tctD  | Transcriptional regulatory protein tctD                                                                                                                                                       | 14.4 | 33.8 | 9.2  | 16.8 | 1  | 0.35 | 0.58 |
| NSCAC_0867 |       | TonB-dependent heme/hemoglobin receptor family protein/TonB-dependent hemoglobin/transferrin/lactoferrin receptor family protein                                                              | 14.3 | 25.2 | 3.7  | 8.5  | 0  | 0.54 | 0.73 |
| NSCAC_1371 | yfiH  | Laccase domain protein YfiH                                                                                                                                                                   | 14.2 | 32.6 | 13.6 | 1.5  | 1  | 0.44 | 0.66 |
| NSCAC_0559 |       | conserved protein of unknown function                                                                                                                                                         | 14   | 37   | 16.1 | 13.5 | 1  | 0.31 | 0.55 |
| NSCAC_1359 |       | GCN5-related N-acetyltransferase (fragment)                                                                                                                                                   | 13.9 | 32.1 | 3.6  | 12.8 | 1  | 0.19 | 0.41 |
| NSCAC_1027 |       | conserved protein of unknown function                                                                                                                                                         | 13.9 | 10.7 | 12.5 | 9.5  | -1 | 0.63 | 0.79 |
| NSCAC_1607 | sspIM | M.SspI                                                                                                                                                                                        | 13.6 | 16.3 | 3.5  | 1    | 0  | 0.77 | 0.88 |
| NSCAC_0296 | ada   | Bifunctional transcriptional activator/DNA repair enzyme Ada [Includes: Methylphosphotriester-DNA--protein-cysteine S-methyltransferase ; Methylated-DNA--protein-cysteine methyltransferase] | 13.4 | 42.3 | 3.8  | 17.9 | 1  | 0.04 | 0.14 |
| NSCAC_0500 |       | Arginine decarboxylase                                                                                                                                                                        | 13.4 | 44.8 | 23.2 | 22.6 | 1  | 0.56 | 0.75 |
| NSCAC_1432 |       | exported protein of unknown function                                                                                                                                                          | 13   | 19.3 | 15.4 | 13.3 | 0  | 0.87 | 0.93 |
| NSCAC_1683 | glnE  | Glutamate-ammonia-ligase adenyltransferase                                                                                                                                                    | 13   | 22.4 | 5.4  | 2.7  | 0  | 0.58 | 0.76 |
| NSCAC_0638 |       | conserved protein of unknown function                                                                                                                                                         | 13   | 31.6 | 22.4 | 28.7 | 1  | 0.78 | 0.89 |
| NSCAC_0464 |       | conserved protein of unknown function                                                                                                                                                         | 12.9 | 24.3 | 11.3 | 14.4 | 0  | 0.78 | 0.88 |
| NSCAC_1044 |       | protein of unknown function                                                                                                                                                                   | 12.9 | 0    | 22.3 | 0    | -7 | 0.05 | NA   |
| NSCAC_1329 |       | protein of unknown function                                                                                                                                                                   | 12.9 | 10.4 | 22.3 | 18   | -1 | 0.74 | 0.86 |
| NSCAC_0215 |       | protein of unknown function                                                                                                                                                                   | 12.8 | 16.6 | 11.3 | 11.8 | 0  | 0.95 | 0.98 |
| NSCAC_0097 |       | Mutator MutT protein                                                                                                                                                                          | 12.7 | 29.5 | 7.1  | 11   | 1  | 0.24 | 0.46 |
| NSCAC_0003 |       | conserved protein of unknown function                                                                                                                                                         | 12.7 | 9.9  | 11.2 | 11.2 | -1 | 0.61 | 0.78 |
| NSCAC_0433 |       | protein of unknown function                                                                                                                                                                   | 12.7 | 51.1 | 11.1 | 6.4  | 1  | 0.1  | 0.26 |
| NSCAC_1619 | cca   | Multifunctional CCA protein [Includes: CCA-adding enzyme ; 2'-nucleotidase ; 2',3'-cyclic phosphodiesterase ; Phosphatase]                                                                    | 12.6 | 57.7 | 3.6  | 7.7  | 2  | 0    | 0    |
| NSCAC_1668 |       | conserved protein of unknown function                                                                                                                                                         | 12.6 | 19.7 | 5.7  | 9.6  | 0  | 0.83 | 0.91 |
| NSCAC_0740 |       | protein of unknown function                                                                                                                                                                   | 12.4 | 5.1  | 21.5 | 8.8  | -2 | 0.55 | 0.74 |
| NSCAC_0168 | waaA  | 3-deoxy-D-manno-octulosonic acid transferase                                                                                                                                                  | 12.2 | 33.4 | 11.1 | 10.9 | 1  | 0.27 | 0.5  |
| NSCAC_0435 |       | protein of unknown function                                                                                                                                                                   | 12.2 | 0    | 21   | 0    | -6 | 0.1  | NA   |
| NSCAC_1481 | yjeK  | putative lysine aminomutase                                                                                                                                                                   | 11.9 | 31.9 | 7.5  | 4    | 1  | 0.14 | 0.34 |
| NSCAC_0439 |       | protein of unknown function                                                                                                                                                                   | 11.9 | 5.7  | 20.6 | 9.8  | -1 | 0.65 | 0.8  |
| NSCAC_0051 |       | conserved protein of unknown function                                                                                                                                                         | 11.8 | 84   | 4.8  | 6.4  | 2  | 0    | 0    |
| NSCAC_0648 |       | conserved protein of unknown function                                                                                                                                                         | 11.7 | 6.9  | 10.3 | 6.1  | -1 | 0.57 | 0.75 |

|            |      |                                                               |      |      |      |      |    |      |      |
|------------|------|---------------------------------------------------------------|------|------|------|------|----|------|------|
| NSCAC_0281 | rbcR | RuBisCO operon transcriptional regulator                      | 11.4 | 31.1 | 13.1 | 11.1 | 1  | 0.33 | 0.56 |
| NSCAC_0909 |      | DNA-directed DNA polymerase                                   | 11.2 | 24   | 6.1  | 7.1  | 1  | 0.42 | 0.65 |
| NSCAC_0810 |      | membrane protein of unknown function                          | 11.2 | 34.5 | 10.5 | 4    | 1  | 0.19 | 0.4  |
| NSCAC_0134 | DDC  | Aromatic-L-amino-acid decarboxylase                           | 11   | 20.3 | 0.9  | 3.7  | 0  | 0.53 | 0.73 |
| NSCAC_0290 |      | N-acetylmuramoyl-L-alanine amidase                            | 10.9 | 17.4 | 3.4  | 3.3  | 0  | 0.76 | 0.87 |
| NSCAC_0513 |      | Glycosyl transferase group 1                                  | 10.6 | 35.6 | 8.6  | 17.1 | 1  | 0.14 | 0.33 |
| NSCAC_0462 | msrB | methionine sulfoxide reductase B                              | 10.6 | 21.2 | 9.9  | 14.1 | 1  | 0.59 | 0.77 |
| NSCAC_1450 |      | Competence protein F                                          | 10.4 | 26.1 | 10   | 3.7  | 1  | 0.35 | 0.58 |
| NSCAC_0067 |      | putative Pilus assembly protein PilP                          | 10.3 | 43   | 10.5 | 13.2 | 2  | 0.08 | 0.23 |
| NSCAC_0647 |      | protein of unknown function                                   | 10.3 | 4.2  | 17.8 | 7.3  | -2 | 0.59 | NA   |
| NSCAC_0006 | ffsA | Formylmethanofuran--tetrahydromethanopterin formyltransferase | 9.9  | 22   | 9.5  | 5.3  | 1  | 0.61 | 0.78 |
| NSCAC_1478 |      | protein of unknown function                                   | 9.6  | 5.5  | 16.6 | 9.6  | -1 | 0.77 | NA   |
| NSCAC_1394 |      | protein of unknown function                                   | 9.5  | 7.5  | 16.5 | 6.7  | -1 | 0.68 | 0.83 |
| NSCAC_0645 |      | CRISPR-associated protein, Csy3 family                        | 9.5  | 18.9 | 7.9  | 7    | 1  | 0.52 | 0.72 |
| NSCAC_0007 | fhcA | Formyltransferase/hydrolase complex Fhc subunit A             | 9.5  | 34.7 | 2.4  | 5.4  | 1  | 0.02 | 0.07 |
| NSCAC_0099 | coaE | dephospho-CoA kinase                                          | 9.4  | 24.1 | 2.5  | 2.8  | 1  | 0.16 | 0.37 |
| NSCAC_0892 |      | Heptaprenyl diphosphate synthase component I (fragment)       | 9.4  | 18.1 | 16.2 | 9.7  | 1  | 0.74 | 0.86 |
| NSCAC_0744 |      | protein of unknown function                                   | 9.4  | 5.4  | 16.2 | 9.4  | -1 | 0.76 | NA   |
| NSCAC_1046 |      | Amidophosphoribosyltransferase (modular protein)              | 8.8  | 22.9 | 8.3  | 19.2 | 1  | 0.43 | 0.66 |
| NSCAC_1438 |      | protein of unknown function                                   | 8.8  | 30.5 | 15.2 | 17.8 | 2  | 0.32 | 0.55 |
| NSCAC_1367 | rsmE | Ribosomal RNA small subunit methyltransferase E               | 8.7  | 11.2 | 4    | 7.2  | 0  | 0.91 | 0.97 |
| NSCAC_0081 | mptN | Alpha-L-glutamate ligase                                      | 8.7  | 17.6 | 2.2  | 9.7  | 1  | 0.51 | 0.71 |
| NSCAC_0756 |      | protein of unknown function                                   | 8.6  | 0    | 15   | 0    | -6 | 0.14 | NA   |
| NSCAC_0644 |      | protein of unknown function                                   | 8.6  | 0    | 14.9 | 0    | -6 | 0.11 | NA   |
| NSCAC_0493 |      | conserved exported protein of unknown function                | 8.5  | 10.5 | 14.7 | 10.6 | 0  | 0.98 | 0.99 |
| NSCAC_1509 |      | Aminoglycoside N(6')-acetyltransferase type 1 (fragment)      | 8.5  | 0    | 14.7 | 0    | -6 | 0.14 | NA   |
| NSCAC_0092 |      | putative regulatory protein, FmdB family                      | 8.2  | 33.8 | 14.1 | 17.8 | 2  | 0.23 | 0.46 |
| NSCAC_1255 |      | conserved protein of unknown function                         | 8.1  | 17.3 | 7.1  | 15.3 | 1  | 0.75 | 0.87 |
| NSCAC_1506 | tusA | Sulfurtransferase TusA homolog                                | 8.1  | 25   | 14   | 14.2 | 1  | 0.54 | 0.73 |
| NSCAC_0605 |      | conserved protein of unknown function                         | 7.8  | 23.5 | 13.5 | 5.7  | 1  | 0.41 | 0.64 |
| NSCAC_0165 | tusA | Sulfurtransferase TusA homolog                                | 7.6  | 38.6 | 13.1 | 8    | 2  | 0.23 | 0.46 |

|            |      |                                                                                                                          |     |      |      |      |    |      |      |
|------------|------|--------------------------------------------------------------------------------------------------------------------------|-----|------|------|------|----|------|------|
| NSCAC_0458 |      | protein of unknown function                                                                                              | 7.6 | 19.2 | 6.7  | 2.5  | 1  | 0.39 | 0.62 |
| NSCAC_0214 |      | membrane protein of unknown function                                                                                     | 7.4 | 34.5 | 6.5  | 24.5 | 2  | 0.13 | 0.31 |
| NSCAC_1527 | ycaR | conserved hypothetical protein                                                                                           | 7.3 | 33.7 | 12.7 | 21.4 | 2  | 0.2  | 0.41 |
| NSCAC_0518 |      | Pilus assembly protein                                                                                                   | 7.2 | 19.7 | 6.3  | 9    | 1  | 0.39 | 0.62 |
| NSCAC_0643 |      | conserved protein of unknown function                                                                                    | 7.1 | 13.9 | 3.2  | 3.4  | 1  | 0.58 | 0.76 |
| NSCAC_1093 |      | protein of unknown function                                                                                              | 7   | 3.3  | 12.2 | 5.8  | -1 | 0.71 | NA   |
| NSCAC_0260 |      | conserved protein of unknown function                                                                                    | 7   | 23   | 6.1  | 1.1  | 1  | 0.19 | 0.41 |
| NSCAC_1761 |      | protein of unknown function                                                                                              | 6.6 | 10.5 | 11.4 | 4.8  | 0  | 0.97 | 0.99 |
| NSCAC_0976 |      | conserved protein of unknown function                                                                                    | 6.5 | 25.7 | 11.2 | 13.1 | 2  | 0.28 | 0.51 |
| NSCAC_0897 |      | protein of unknown function                                                                                              | 5.9 | 21.9 | 10.2 | 19.1 | 2  | 0.47 | 0.69 |
| NSCAC_1405 |      | conserved protein of unknown function                                                                                    | 5.6 | 62.9 | 9.7  | 13.2 | 3  | 0.1  | 0.25 |
| NSCAC_0079 |      | conserved protein of unknown function                                                                                    | 5.6 | 14.9 | 5.6  | 5.4  | 1  | 0.44 | 0.66 |
| NSCAC_0520 |      | putative Fimbrial biogenesis protein                                                                                     | 5.4 | 39   | 4.7  | 20.9 | 2  | 0.02 | 0.08 |
| NSCAC_0636 |      | conserved exported protein of unknown function                                                                           | 5.4 | 42   | 4.7  | 22   | 2  | 0.01 | 0.05 |
| NSCAC_1084 |      | Cytochrome c class I (fragment)                                                                                          | 5.1 | 41.9 | 8.9  | 17.7 | 3  | 0.04 | 0.14 |
| NSCAC_1229 |      | conserved protein of unknown function                                                                                    | 5   | 26.2 | 8.7  | 19.6 | 2  | 0.19 | 0.41 |
| NSCAC_1684 |      | protein of unknown function                                                                                              | 4.9 | 15.9 | 8.5  | 14.8 | 1  | 0.58 | 0.76 |
| NSCAC_0082 |      | conserved protein of unknown function                                                                                    | 4.9 | 14.2 | 5.2  | 10.2 | 1  | 0.47 | NA   |
| NSCAC_0634 |      | HAD-superfamily hydrolase, subfamily IA, variant 3                                                                       | 4.9 | 30.9 | 4.4  | 15.7 | 2  | 0.05 | 0.16 |
| NSCAC_1462 | macB | fragment of fused macrolide transporter subunits of ABC superfamily: ATP-binding component ; membrane component (part 1) | 4.6 | 32.3 | 4.1  | 7.2  | 2  | 0.02 | 0.08 |
| NSCAC_0065 |      | Type 4 fimbrial biogenesis protein PilN                                                                                  | 3.2 | 15.4 | 5.6  | 13.4 | 2  | 0.45 | NA   |
| NSCAC_0041 |      | HlyD family multidrug efflux protein                                                                                     | 1.9 | 22.8 | 3.2  | 5.6  | 3  | 0.04 | 0.13 |
| NSCAC_0023 |      | protein of unknown function                                                                                              | 0   | 0    | 0    | 0    | NA | NA   | NA   |
| NSCAC_0053 |      | protein of unknown function                                                                                              | 0   | 0    | 0    | 0    | NA | NA   | NA   |
| NSCAC_0071 |      | Nucleic acid-binding domain protein (fragment)                                                                           | 0   | 12.4 | 0    | 6.7  | 6  | 0.03 | NA   |
| NSCAC_0072 |      | protein of unknown function                                                                                              | 0   | 0    | 0    | 0    | NA | NA   | NA   |
| NSCAC_0073 |      | protein of unknown function                                                                                              | 0   | 0    | 0    | 0    | NA | NA   | NA   |
| NSCAC_0135 |      | protein of unknown function                                                                                              | 0   | 0    | 0    | 0    | NA | NA   | NA   |
| NSCAC_0176 |      | protein of unknown function                                                                                              | 0   | 0    | 0    | 0    | NA | NA   | NA   |
| NSCAC_0180 |      | protein of unknown function                                                                                              | 0   | 0    | 0    | 0    | NA | NA   | NA   |

|            |  |                                                 |   |      |   |      |    |      |      |
|------------|--|-------------------------------------------------|---|------|---|------|----|------|------|
| NSCAC_0181 |  | protein of unknown function                     | 0 | 0    | 0 | 0    | NA | NA   | NA   |
| NSCAC_0182 |  | protein of unknown function                     | 0 | 25.3 | 0 | 29.8 | 7  | 0    | 0.02 |
| NSCAC_0183 |  | protein of unknown function                     | 0 | 0    | 0 | 0    | NA | NA   | NA   |
| NSCAC_0185 |  | protein of unknown function                     | 0 | 0    | 0 | 0    | NA | NA   | NA   |
| NSCAC_0216 |  | protein of unknown function                     | 0 | 0    | 0 | 0    | NA | NA   | NA   |
| NSCAC_0217 |  | protein of unknown function                     | 0 | 0    | 0 | 0    | NA | NA   | NA   |
| NSCAC_0218 |  | membrane protein of unknown function            | 0 | 3.9  | 0 | 6.8  | 4  | 0.3  | NA   |
| NSCAC_0285 |  | protein of unknown function                     | 0 | 5.3  | 0 | 9.2  | 4  | 0.25 | NA   |
| NSCAC_0393 |  | protein of unknown function                     | 0 | 19.1 | 0 | 17   | 6  | 0.02 | NA   |
| NSCAC_0394 |  | Holo-[acyl-carrier-protein] synthase (fragment) | 0 | 5.2  | 0 | 9    | 4  | 0.28 | NA   |
| NSCAC_0428 |  | protein of unknown function                     | 0 | 0    | 0 | 0    | NA | NA   | NA   |
| NSCAC_0430 |  | protein of unknown function                     | 0 | 0    | 0 | 0    | NA | NA   | NA   |
| NSCAC_0434 |  | protein of unknown function                     | 0 | 11.3 | 0 | 10   | 5  | 0.14 | NA   |
| NSCAC_0436 |  | protein of unknown function                     | 0 | 9.1  | 0 | 15.8 | 5  | 0.2  | NA   |
| NSCAC_0465 |  | protein of unknown function                     | 0 | 0    | 0 | 0    | NA | NA   | NA   |
| NSCAC_0474 |  | conserved protein of unknown function           | 0 | 31.3 | 0 | 9.7  | 7  | 0    | 0    |
| NSCAC_0492 |  | protein of unknown function                     | 0 | 0    | 0 | 0    | NA | NA   | NA   |
| NSCAC_0495 |  | protein of unknown function                     | 0 | 0    | 0 | 0    | NA | NA   | NA   |
| NSCAC_0519 |  | putative Fimbrial protein pilin                 | 0 | 43.8 | 0 | 26.3 | 7  | 0    | 0    |
| NSCAC_0649 |  | conserved protein of unknown function           | 0 | 0    | 0 | 0    | NA | NA   | NA   |
| NSCAC_0650 |  | protein of unknown function                     | 0 | 0    | 0 | 0    | NA | NA   | NA   |
| NSCAC_0651 |  | conserved protein of unknown function           | 0 | 3.7  | 0 | 6.4  | 4  | 0.34 | NA   |
| NSCAC_0652 |  | protein of unknown function                     | 0 | 0    | 0 | 0    | NA | NA   | NA   |
| NSCAC_0672 |  | protein of unknown function                     | 0 | 0    | 0 | 0    | NA | NA   | NA   |
| NSCAC_0675 |  | protein of unknown function                     | 0 | 0    | 0 | 0    | NA | NA   | NA   |
| NSCAC_0684 |  | protein of unknown function                     | 0 | 0    | 0 | 0    | NA | NA   | NA   |
| NSCAC_0687 |  | protein of unknown function                     | 0 | 0    | 0 | 0    | NA | NA   | NA   |
| NSCAC_0689 |  | protein of unknown function                     | 0 | 19.3 | 0 | 23.1 | 6  | 0.02 | NA   |
| NSCAC_0690 |  | protein of unknown function                     | 0 | 8.7  | 0 | 7.7  | 5  | 0.19 | NA   |
| NSCAC_0692 |  | conserved protein of unknown function           | 0 | 0    | 0 | 0    | NA | NA   | NA   |
| NSCAC_0694 |  | protein of unknown function                     | 0 | 0    | 0 | 0    | NA | NA   | NA   |

|            |  |                                                |   |       |   |      |    |      |      |
|------------|--|------------------------------------------------|---|-------|---|------|----|------|------|
| NSCAC_0698 |  | protein of unknown function                    | 0 | 4.2   | 0 | 7.3  | 4  | 0.31 | NA   |
| NSCAC_0699 |  | protein of unknown function                    | 0 | 40    | 0 | 51.8 | 7  | 0    | 0    |
| NSCAC_0700 |  | protein of unknown function                    | 0 | 0     | 0 | 0    | NA | NA   | NA   |
| NSCAC_0748 |  | Putative cytochrome c, class I                 | 0 | 0     | 0 | 0    | NA | NA   | NA   |
| NSCAC_0820 |  | conserved exported protein of unknown function | 0 | 753.1 | 0 | 47.6 | 1  | 0    | 0    |
| NSCAC_0823 |  | protein of unknown function                    | 0 | 0     | 0 | 0    | NA | NA   | NA   |
| NSCAC_0824 |  | protein of unknown function                    | 0 | 9.1   | 0 | 8    | 5  | 0.18 | NA   |
| NSCAC_0827 |  | conserved protein of unknown function          | 0 | 0     | 0 | 0    | NA | NA   | NA   |
| NSCAC_0845 |  | protein of unknown function                    | 0 | 0     | 0 | 0    | NA | NA   | NA   |
| NSCAC_0850 |  | conserved protein of unknown function          | 0 | 0     | 0 | 0    | NA | NA   | NA   |
| NSCAC_0851 |  | protein of unknown function                    | 0 | 0     | 0 | 0    | NA | NA   | NA   |
| NSCAC_0899 |  | protein of unknown function                    | 0 | 0     | 0 | 0    | NA | NA   | NA   |
| NSCAC_0902 |  | protein of unknown function                    | 0 | 0     | 0 | 0    | NA | NA   | NA   |
| NSCAC_0932 |  | protein of unknown function                    | 0 | 0     | 0 | 0    | NA | NA   | NA   |
| NSCAC_0946 |  | protein of unknown function                    | 0 | 0     | 0 | 0    | NA | NA   | NA   |
| NSCAC_0991 |  | protein of unknown function                    | 0 | 0     | 0 | 0    | NA | NA   | NA   |
| NSCAC_1001 |  | protein of unknown function                    | 0 | 0     | 0 | 0    | NA | NA   | NA   |
| NSCAC_1019 |  | protein of unknown function                    | 0 | 448.7 | 0 | 33.3 | 0  | 0.06 | 0.18 |
| NSCAC_1022 |  | protein of unknown function                    | 0 | 0     | 0 | 0    | NA | NA   | NA   |
| NSCAC_1040 |  | protein of unknown function                    | 0 | 0     | 0 | 0    | NA | NA   | NA   |
| NSCAC_1048 |  | protein of unknown function                    | 0 | 22.9  | 0 | 28.2 | 7  | 0.01 | 0.05 |
| NSCAC_1057 |  | protein of unknown function                    | 0 | 0     | 0 | 0    | NA | NA   | NA   |
| NSCAC_1099 |  | protein of unknown function                    | 0 | 8.4   | 0 | 4.8  | 5  | 0.15 | NA   |
| NSCAC_1139 |  | protein of unknown function                    | 0 | 0     | 0 | 0    | NA | NA   | NA   |
| NSCAC_1140 |  | protein of unknown function                    | 0 | 0     | 0 | 0    | NA | NA   | NA   |
| NSCAC_1150 |  | protein of unknown function                    | 0 | 0     | 0 | 0    | NA | NA   | NA   |
| NSCAC_1180 |  | protein of unknown function                    | 0 | 0     | 0 | 0    | NA | NA   | NA   |
| NSCAC_1183 |  | protein of unknown function                    | 0 | 0     | 0 | 0    | NA | NA   | NA   |
| NSCAC_1184 |  | conserved protein of unknown function          | 0 | 3.4   | 0 | 6    | 4  | 0.33 | NA   |
| NSCAC_1225 |  | protein of unknown function                    | 0 | 0     | 0 | 0    | NA | NA   | NA   |
| NSCAC_1249 |  | protein of unknown function                    | 0 | 0     | 0 | 0    | NA | NA   | NA   |

|            |      |                                                      |   |      |   |      |    |      |      |
|------------|------|------------------------------------------------------|---|------|---|------|----|------|------|
| NSCAC_1380 |      | protein of unknown function                          | 0 | 0    | 0 | 0    | NA | NA   | NA   |
| NSCAC_1395 |      | protein of unknown function                          | 0 | 9.8  | 0 | 16.9 | 5  | 0.17 | NA   |
| NSCAC_1426 |      | conserved protein of unknown function                | 0 | 0    | 0 | 0    | NA | NA   | NA   |
| NSCAC_1428 |      | protein of unknown function                          | 0 | 0    | 0 | 0    | NA | NA   | NA   |
| NSCAC_1441 |      | protein of unknown function                          | 0 | 12.3 | 0 | 3.8  | 6  | 0.03 | NA   |
| NSCAC_1442 |      | protein of unknown function                          | 0 | 4.3  | 0 | 7.5  | 4  | 0.28 | NA   |
| NSCAC_1460 |      | protein of unknown function                          | 0 | 0    | 0 | 0    | NA | NA   | NA   |
| NSCAC_1498 |      | protein of unknown function                          | 0 | 0    | 0 | 0    | NA | NA   | NA   |
| NSCAC_1510 |      | GCN5-related N-acetyltransferase (fragment)          | 0 | 0    | 0 | 0    | NA | NA   | NA   |
| NSCAC_1532 |      | protein of unknown function                          | 0 | 0    | 0 | 0    | NA | NA   | NA   |
| NSCAC_1533 |      | protein of unknown function                          | 0 | 4    | 0 | 6.9  | 4  | 0.33 | NA   |
| NSCAC_1566 |      | protein of unknown function                          | 0 | 4.3  | 0 | 7.4  | 4  | 0.31 | NA   |
| NSCAC_1616 |      | protein of unknown function                          | 0 | 0    | 0 | 0    | NA | NA   | NA   |
| NSCAC_1621 |      | protein of unknown function                          | 0 | 5.9  | 0 | 10.2 | 5  | 0.24 | NA   |
| NSCAC_1640 |      | protein of unknown function                          | 0 | 43.4 | 0 | 47.4 | 7  | 0.06 | 0.18 |
| NSCAC_1694 | yggU | conserved hypothetical protein                       | 0 | 14.3 | 0 | 5.7  | 6  | 0.01 | NA   |
| NSCAC_1705 |      | protein of unknown function                          | 0 | 0    | 0 | 0    | NA | NA   | NA   |
| NSCAC_1762 |      | protein of unknown function                          | 0 | 0    | 0 | 0    | NA | NA   | NA   |
| NSCAC_1763 |      | Transposon Tn7 transposition protein TnsA (fragment) | 0 | 6.9  | 0 | 6.6  | 5  | 0.22 | NA   |
| NSCAC_1764 |      | protein of unknown function                          | 0 | 18   | 0 | 15.7 | 6  | 0.02 | NA   |
